# 1 Highly scaled measurements of *C. elegans* development suggest that physical 2 constraints guide growth trajectories and animal shape

3 Joy Nyaanga<sup>1,2</sup>, Christina Goss<sup>3</sup>, Gaotian Zhang<sup>1</sup>, Hannah N. Ahmed<sup>1</sup>, Elliot J. Andersen<sup>1</sup>, Isabella R.  
4 Miller<sup>1</sup>, Justine K. Rozenich<sup>1</sup>, Iris L. Swarthout<sup>1</sup>, Jordan A. Vaughn<sup>1</sup>, Erik C. Andersen<sup>1</sup>, Niall M.  
5 Mangan<sup>3</sup>, and Sasha Shirman<sup>3</sup>

6 1. Department of Molecular Biosciences, Northwestern University, Evanston, IL 60208, USA

7 2. Interdisciplinary Biological Sciences Program, Northwestern University, Evanston, IL 60208, USA

8 3. Department of Engineering Sciences and Applied Mathematics, Northwestern University, Evanston, IL  
9 60208, USA

10 **Keywords:** Developmental growth; growth control; *C. elegans*; feeding dynamics; growth dynamics; stretcher  
11 model

## 12 **Emails and ORCIDs:**

13 JN: [JoyNyaanga2024@u.northwestern.edu](mailto:JoyNyaanga2024@u.northwestern.edu), 0000-0002-1402-9213

14 CG: [christinagoss2021@u.northwestern.edu](mailto:christinagoss2021@u.northwestern.edu), 0000-0002-5715-3337

15 GZ: [gaotian.zhang@northwestern.edu](mailto:gaotian.zhang@northwestern.edu), 0000-0001-6468-1341

16 HNA: [hannahahmed02@gmail.com](mailto:hannahahmed02@gmail.com)

17 EJA: [elliottjandersen@gmail.com](mailto:elliottjandersen@gmail.com)

18 IRM: [miller.ir18@gmail.com](mailto:miller.ir18@gmail.com)

19 JKR: [justine.rozenich@icloud.com](mailto:justine.rozenich@icloud.com)

20 ILS: [IrisSwarthout2023@u.northwestern.edu](mailto:IrisSwarthout2023@u.northwestern.edu)

21 JAV: [JordanVaughn2023@u.northwestern.edu](mailto:JordanVaughn2023@u.northwestern.edu)

22 ECA: [erik.andersen@gmail.com](mailto:erik.andersen@gmail.com), 0000-0003-0229-9651

23 NMM: [niallmm@gmail.com](mailto:niallmm@gmail.com), 0000-0002-3491-8341

24 SS: [shirman.sasha@gmail.com](mailto:shirman.sasha@gmail.com), 0000-0001-5855-9470

## 25 **Abstract**

26 Growth control establishes organism size, requiring mechanisms to sense and adjust growth. Studies of single  
27 cells revealed that size homeostasis uses distinct control methods: Size, Timer, and Adder. In multicellular  
28 organisms, mechanisms that regulate single cell growth must integrate control across organs and tissues  
29 during development to generate adult size and shape. We leveraged the roundworm *Caenorhabditis elegans*  
30 as a scalable and tractable model to collect precise growth measurements of thousands of individuals,  
31 measure feeding behavior, and quantify changes in animal size and shape. Using quantitative measurements  
32 and mathematical modeling, we propose two models of physical mechanisms by which *C. elegans* can control  
33 growth. First, constraints on cuticle stretch generate mechanical signals through which animals sense body  
34 size and initiate larval-stage transitions. Second, mechanical control of food intake drives growth rate within  
35 larval stages. These results suggest how physical constraints control developmental timing and growth rate in  
36 *C. elegans*.

## 37 Introduction

38 Growth is a complex process fundamental to development. Individual cells and whole animals must reach an  
39 appropriate size to remain competitive in their environment. A larger body size conveys many selective  
40 advantages to an organism, including increased predation success or defense against predation, increased  
41 success in mating, and increased success in intraspecific as well as interspecific competition. Offsetting these  
42 advantages, larger organisms require more food resources to grow, take longer to develop, and produce fewer  
43 offspring (Hone and Benton, 2005). Therefore, it is critical for multicellular organisms to effectively coordinate  
44 the growth of both individual cells and the whole body. Additionally, growth at both of these scales must be  
45 coupled with developmental progression to ensure the proper timing of irreversible developmental events.

46 In recent years, efforts have focused on understanding how organisms control growth to achieve size  
47 homeostasis (Björklund, 2019; Turner et al., 2012; Willis and Huang, 2017). Many of these studies are  
48 motivated by the decades-long debate about whether growth is linear or exponential; two separate models  
49 each having unique implications for size regulation. In a linear model with constant growth rate, smaller  
50 organisms must grow proportionally more than larger organisms to maintain size homeostasis. In this  
51 paradigm, organism size can be controlled simply by specifying growth duration. Subsequently, this method of  
52 growth control was named the 'Timer' model (Donnan and John, 1983; Wang et al., 2000). Instead of  
53 regulating growth duration, organisms can monitor size and adjust duration of growth to reach an optimal size,  
54 often named the 'Sizer' model (Pavelescu et al., 2018; Svecizer et al., 1996; Tzur et al., 2009). In an  
55 exponential model, growth rate is proportional to size. Here, a time-based control mechanism alone would fail  
56 to maintain size homeostasis because larger organisms would grow proportionally more during a specified  
57 period of time. This difference in growth requires a size-based control mechanism to ensure that growth is  
58 halted once a maximum size is reached. Although 'Timer' and 'Sizer' are the most often proposed size-control  
59 models, other models have been suggested, including 'Adder' in which a fixed volume is added to a cell or  
60 organism during growth (Campos et al., 2014; Taheri-Araghi et al., 2015), and 'Folder' in which the organism  
61 increases in volume by a fixed proportion (Towbin and Grosshans, 2021). It is not trivial to determine which

62 model most accurately describes growth of individual cells or whole organisms because quantitative  
63 measurements of growth must be collected at high precision and throughput under tightly controlled  
64 experimental conditions. In unicellular organisms, the development of high-throughput experimental techniques  
65 in combination with theoretical models have advanced the understanding of size control (Cadart et al., 2018;  
66 Jorgensen and Tyers, 2004; Osella et al., 2014; Soifer et al., 2016; Wang et al., 2010). Progress has been  
67 slower for multicellular organisms because cell growth within tissues and tissue growth within organisms often  
68 progress at different rates, suggesting that they are likely not regulated in the same ways (Moss-Taylor et al.,  
69 2019; Spence, 2009; Uppaluri et al., 2016).

70 The nematode *Caenorhabditis elegans* presents both a scalable and tractable multicellular animal model to  
71 study growth control. With an adult body length of approximately 1 mm, hundreds of thousands of individuals  
72 are easily cultured in controlled laboratory conditions (Wood, 1988). Moreover, *C. elegans* post-embryonic  
73 development is marked by several molts that provide clear developmental milestones (Page and Johnstone,  
74 2007a). Each molt is initiated by a period of inactivity (lethargus) and terminated once the animal successfully  
75 sheds its collagen-rich outer cuticle (ecdysis) (Singh and Sulston, 1978). Four molts separate the *C. elegans*  
76 life cycle into five distinct stages: four larval stages (L1-L4) and adult. The timing of these molts determines the  
77 completion of stage-specific development (Monsalve et al., 2011; Zaidel-Bar et al., 2010) and underscores the  
78 importance of growth regulation during *C. elegans* larval development.

79 A full description of an organism's development includes the assessment of how growth and body size are  
80 regulated. Initial studies of *C. elegans* development described whole-organism growth as a sigmoidal curve  
81 characterized by continuous larval growth in length that reaches saturation in adulthood (Byerly et al., 1976).  
82 These early studies hypothesized that molt events had little effect on continuous growth as the *C. elegans*  
83 cuticle allowed for stretch during larval stages. Later work determined that larval progression was not  
84 continuous but rather piecewise in nature (Knight et al., 2002). This study showed that *C. elegans* volumetric  
85 growth rate increased from stage to stage such that L1 animals had the slowest rate of growth and L4 animals



86 had the fastest. This finding suggests that *C. elegans* have a mechanism for regulating growth rate, potentially  
87 at each molt. Next, researchers using single-animal imaging strategies observed that animals did not advance  
88 to the next developmental stage until a critical volume was reached (Uppaluri and Brangwynne, 2015). This  
89 finding suggests that *C. elegans* growth follows a 'Sizer' model with each molt decision controlled by a volume  
90 threshold and further implies that individual cells are able to communicate information about body size to  
91 precisely regulate growth. Most recently, live imaging and characterization of body volume heterogeneity  
92 revealed that with respect to the start of a larval stage, *C. elegans* volume fold change within a stage is nearly  
93 invariant thereby preventing rapid divergence in volume between fast and slow growing animals (Towbin and  
94 Grosshans, 2021).

95 Extensive characterization of *C. elegans* body size mutants has revealed several processes that influence  
96 growth rate and body size (Tuck, 2014). A number of genes act through signaling pathways to influence growth  
97 and body size (McKeown et al., 1998; Patterson and Padgett, 2000). Some of these pathways contribute to  
98 body size control by regulating cuticle collagen genes (Madaan et al., 2018). Alternatively, mutations in some  
99 cuticle collagen genes directly disrupt the physical structure of the cuticle (Page and Johnstone, 2007b). These  
100 structural changes act as physical constraints on growth as opposed to regulatory mechanisms of growth  
101 control. Environmental factors also play a significant role in *C. elegans* growth control. Food restriction is  
102 known to decrease growth rate or, when extreme, induce complete developmental arrest (Baugh, 2013; Hu,  
103 2018; Uppaluri and Brangwynne, 2015). In *C. elegans*, mutations that disrupt the ability to properly consume  
104 food also cause individuals to be small and thin, indicating that food intake can act as a physical constraint on  
105 growth and body shape (Mörck and Pilon, 2006).

106 To understand *C. elegans* growth control at the whole-organism level, precise measurements of body size and  
107 shape for large numbers of individuals are required. Using a combination of quantitative growth measurements  
108 and mathematical modeling, we performed a high-resolution longitudinal study of *C. elegans* larval progression  
109 and captured high-precision details about animal length, width, volume, and feeding dynamics. By investigating

110 *C. elegans* feeding and growth in tandem for thousands of individual animals, we found decreases in feeding  
111 behavior associated with each larval transition that were also correlated in time with changes in growth. We  
112 used our large-scale measurements of body size to further analyze the periods of time surrounding each larval  
113 transition. At each molt, we observed simultaneous increases in length, decreases in width, and maintenance  
114 of volume, suggesting that body shape in addition to size plays a role in the control of *C. elegans* growth.  
115 Given these data, we propose a “Stretcher” mechanism for growth control whereby *C. elegans* senses body  
116 size through physical constraints on cuticle stretch and undergoes larval-stage transitions when the cuticle  
117 reaches its maximum capacity for stretch. Additionally, we propose that *C. elegans* are able to physically  
118 constrain growth rate by modulating food intake. We used quantitative models of eating and growth to evaluate  
119 our data and predicted that the rate of volumetric growth is controlled by animal feeding rate and metabolic  
120 regulation. Food allocated toward growth reached maxima and minima at larval transitions, indicating  
121 increased metabolic control at these points in development.

## 122 **Results**

### 123 **Quantitative measurements of *C. elegans* growth**

124 We have optimized a quantitative growth assay that reliably measures small changes in *C. elegans* body size  
125 throughout development (Fig 1). Our method provides both high-throughput and high-precision assessment of  
126 developmental growth. In brief, populations of 100,000 animals were cultured in flasks. We cultured six  
127 replicate populations of *C. elegans* for a total of 600,000 synchronized and growing animals. Every hour after  
128 feeding, a sample of the population from each flask (~300 animals/flask) was collected to measure animal  
129 length, width, and feeding rate. Feeding rate, examined using fluorescent microspheres, and body size were  
130 measured using the COPAS BIOSORT (Union Biometrica). Then, the ImageXpress system (Molecular  
131 Devices) was used to collect images of sampled animals. This platform allowed for the further analysis of life  
132 stage and body size, contributing added precision to our measurements.

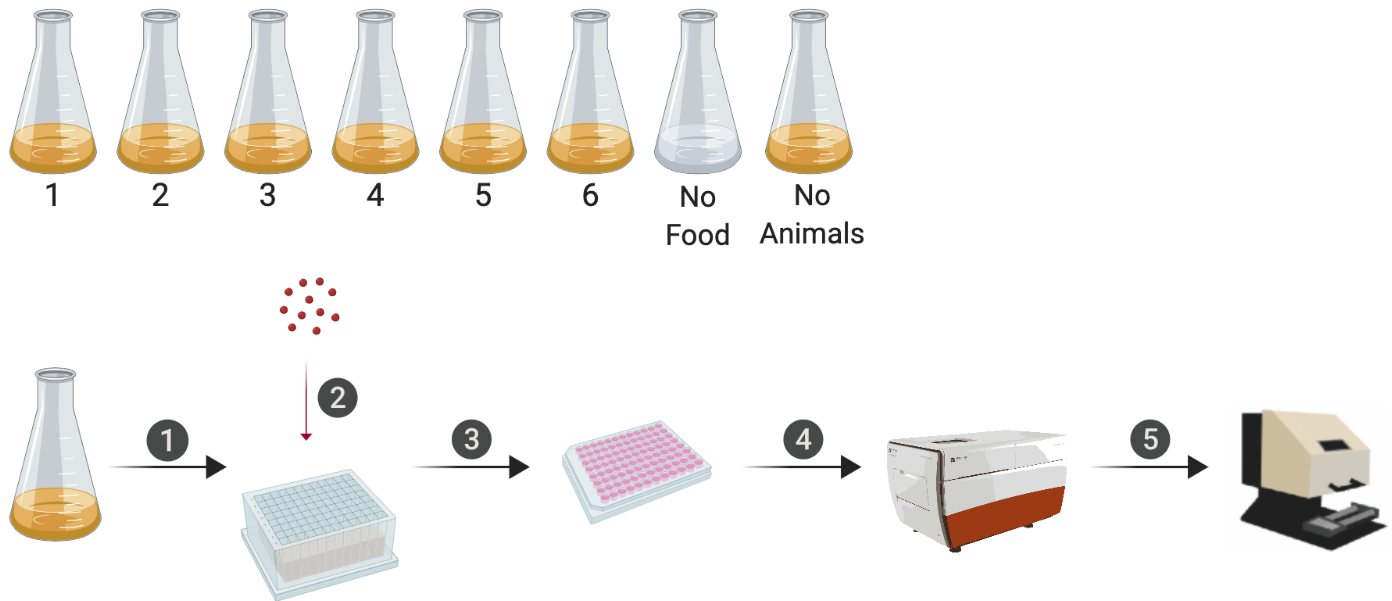

133 **Fig 1. An overview of the quantitative growth assay.**

134 Schematic of the experimental workflow was created with BioRender.com. Synchronized animals were cultured  
135 in flasks where six flasks contained replicate populations of nematodes, one flask had a population of unfed  
136 animals, and one flask only contained bacterial food. At each hour of the experiment, all eight flasks were  
137 sampled. In step 1, animals were transferred from each flask to a single well of a 96-well microtiter plate. In  
138 step 2, fluorescent beads were added to each well. Following a 10-minute incubation period, animals from  
139 each well of the deep-well plate were transferred to several wells of a 96-well microtiter plate for step 3. In step  
140 4, animals in each well of the microtiter plate were imaged. In step 5, the same animals were measured using  
141 the COPAS BIOSORT. This process was repeated every hour after feeding for 72 consecutive hours (see  
142 Methods).

143 The raw data from the quantitative growth assay provides measurements of body size and feeding behavior,  
144 which are traits related to animal growth. Two measurements of body size were collected from raw data taken  
145 from the COPAS BIOSORT: time of flight (TOF) and optical extinction (EXT) (S1 Fig). Time of flight is a  
146 measurement of body length, and optical extinction corresponds to optical density, a measurement influenced  
147 by body length, thickness, and composition (Andersen et al., 2015; Pulak, 2006). We investigated whether  
148 optical extinction could be correlated to a different measure of body size using the collection of manual size  
149 measurements from images (see Methods). We calculated the median length, width, area, and volume of  
150 animals in a subset of imaged wells from each hour of the experiment. We then compared these values to well  
151 median statistics from the processed COPAS BIOSORT data. We found a strong correlation between manual  
152 measurements of animal length from the image analysis and TOF measurements from the COPAS BIOSORT

153 (S2 Fig). We also observed an equally strong correlation between manual measurements of animal area and  
154 EXT as well as animal width and EXT normalized by body length (norm.EXT). We then approximated animal  
155 volume using measurements from the COPAS BIOSORT by using a cylindrical approximation for *C. elegans*  
156 shape (see Methods). This result expanded the number of body size parameters that we were able to assess  
157 using the COPAS BIOSORT data, allowing us to investigate growth dynamics in length, width, and volume (Fig  
158 2A-C). To disentangle nematode objects from non-animal objects (bacteria clumps, detritus, shed cuticles), we  
159 employed model-based clustering to remove unwanted objects and better examine growth of animals (S3 Fig).  
160 Lastly, we converted COPAS BIOSORT measurements into microns (see Methods).

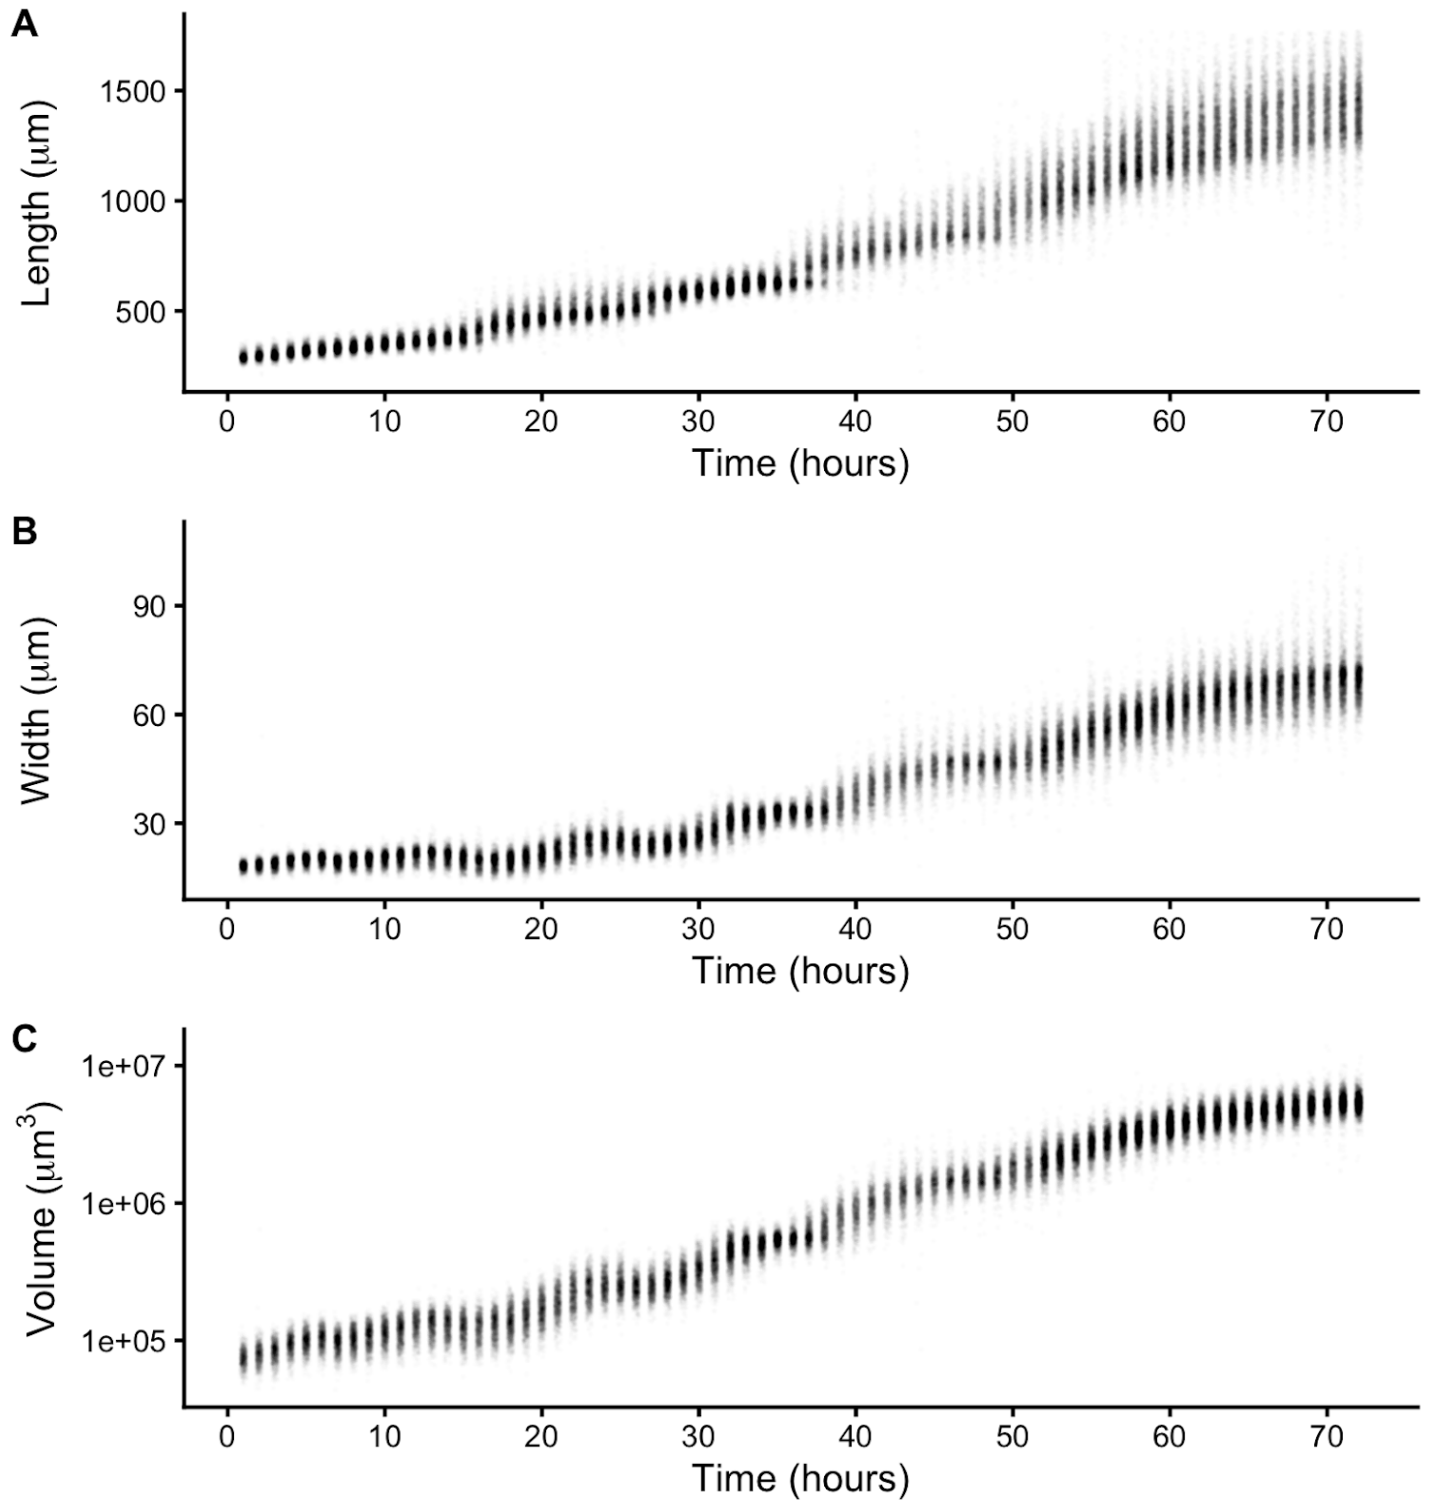

161 **Fig 2. Quantitative measurements of animal size.**

162 COPAS BIOSORT data of animal length (A), width (B), and volume (C) after the removal of non-animal objects  
163 using model-based clustering methods (see Methods).

164 We report body length, width, and volume of animals at each hour of development from L1 to adult (S1 Fig and  
165 Fig 2). Historically, growth of *C. elegans* has been shown as a sigmoidal curve where exponential growth  
166 during larval stages reaches a maximum rate in adulthood (Byerly et al., 1976). More recently, researchers  
167 have identified that growth curves are discontinuous during development punctuated by larval transitions  
168 (Knight et al., 2002; Uppaluri and Brangwynne, 2015). Using our quantitative growth assay, we captured these  
169 small-scale discontinuities in larval growth as well as an apparent growth maximum during early adulthood. We  
170 noticed that all size variables (length, width, and volume) displayed these dynamics. Objects identified as  
171 animals appear to grow in size. However, in particular time windows during development, growth dynamics  
172 visibly shift, producing discontinuities in animal growth rate. With these data, we were able to further  
173 investigate *C. elegans* growth and size control.

## 174 **Fluorescence provides a quantitative measurement of animal feeding behavior and** 175 **developmental progression**

176 In addition to body size and shape, the raw data from the quantitative growth assay described above measured  
177 fluorescence of each animal object. To readily assess the thousands of measurements acquired at each hour,  
178 we generated summary statistics of median well measurements (S1 Table). With these summarized data, we  
179 investigated the relationship between feeding behavior and developmental stage. It is well established that  
180 temporary suspensions of *C. elegans* feeding occur during each molt (Byerly et al., 1976; Cassada and  
181 Russell, 1975). As such, active feeding is frequently used to distinguish growing animals from individuals in a  
182 molt. We quantified feeding behavior by exposing animals to fluorescent beads the approximate size of  
183 bacteria and measuring fluorescence of animals (Nika et al., 2016). Because larger animals are able to  
184 consume more food and therefore contain more ingested food, we normalized fluorescence by animal area to  
185 account for increases in body size (S4 Fig). The resulting fluorescence data showed a dynamic pattern (Fig  
186 3A). At approximately 15 hours, fluorescence steadily increased to a peak before decreasing back to initial  
187 levels at approximately hour 27. This pattern, repeated three additional times, established clear time windows  
188 of local minimal fluorescence. These local minima represent periods of time where a large proportion of the

189 population had reduced or ceased feeding and therefore suggests time windows where a majority of animals  
190 were likely not feeding because they were in a molt. We used a local kernel regression method to estimate a  
191 smooth curve and calculate the derivative to identify the time associated with each local minimum (see  
192 Methods). We then assessed images collected from the growth assay and demonstrated that periods of  
193 decreased feeding are concurrent with the presence of shed cuticles, supporting that animals are undergoing a  
194 molt during these periods of time (S5 Fig). When we overlaid the timing of each local minimum on the  
195 population size data, we were able to outline the start and end of each larval stage (Fig 3B-D). Notably, local  
196 minima occurred approximately every ten hours, consistent with well established observations of molt timing  
197 (Byerly et al., 1976). Furthermore, we observed a clear relationship between changes in feeding behavior and  
198 growth dynamics where decreases in feeding occurred simultaneously with discontinuous growth in length,  
199 width, and volume.

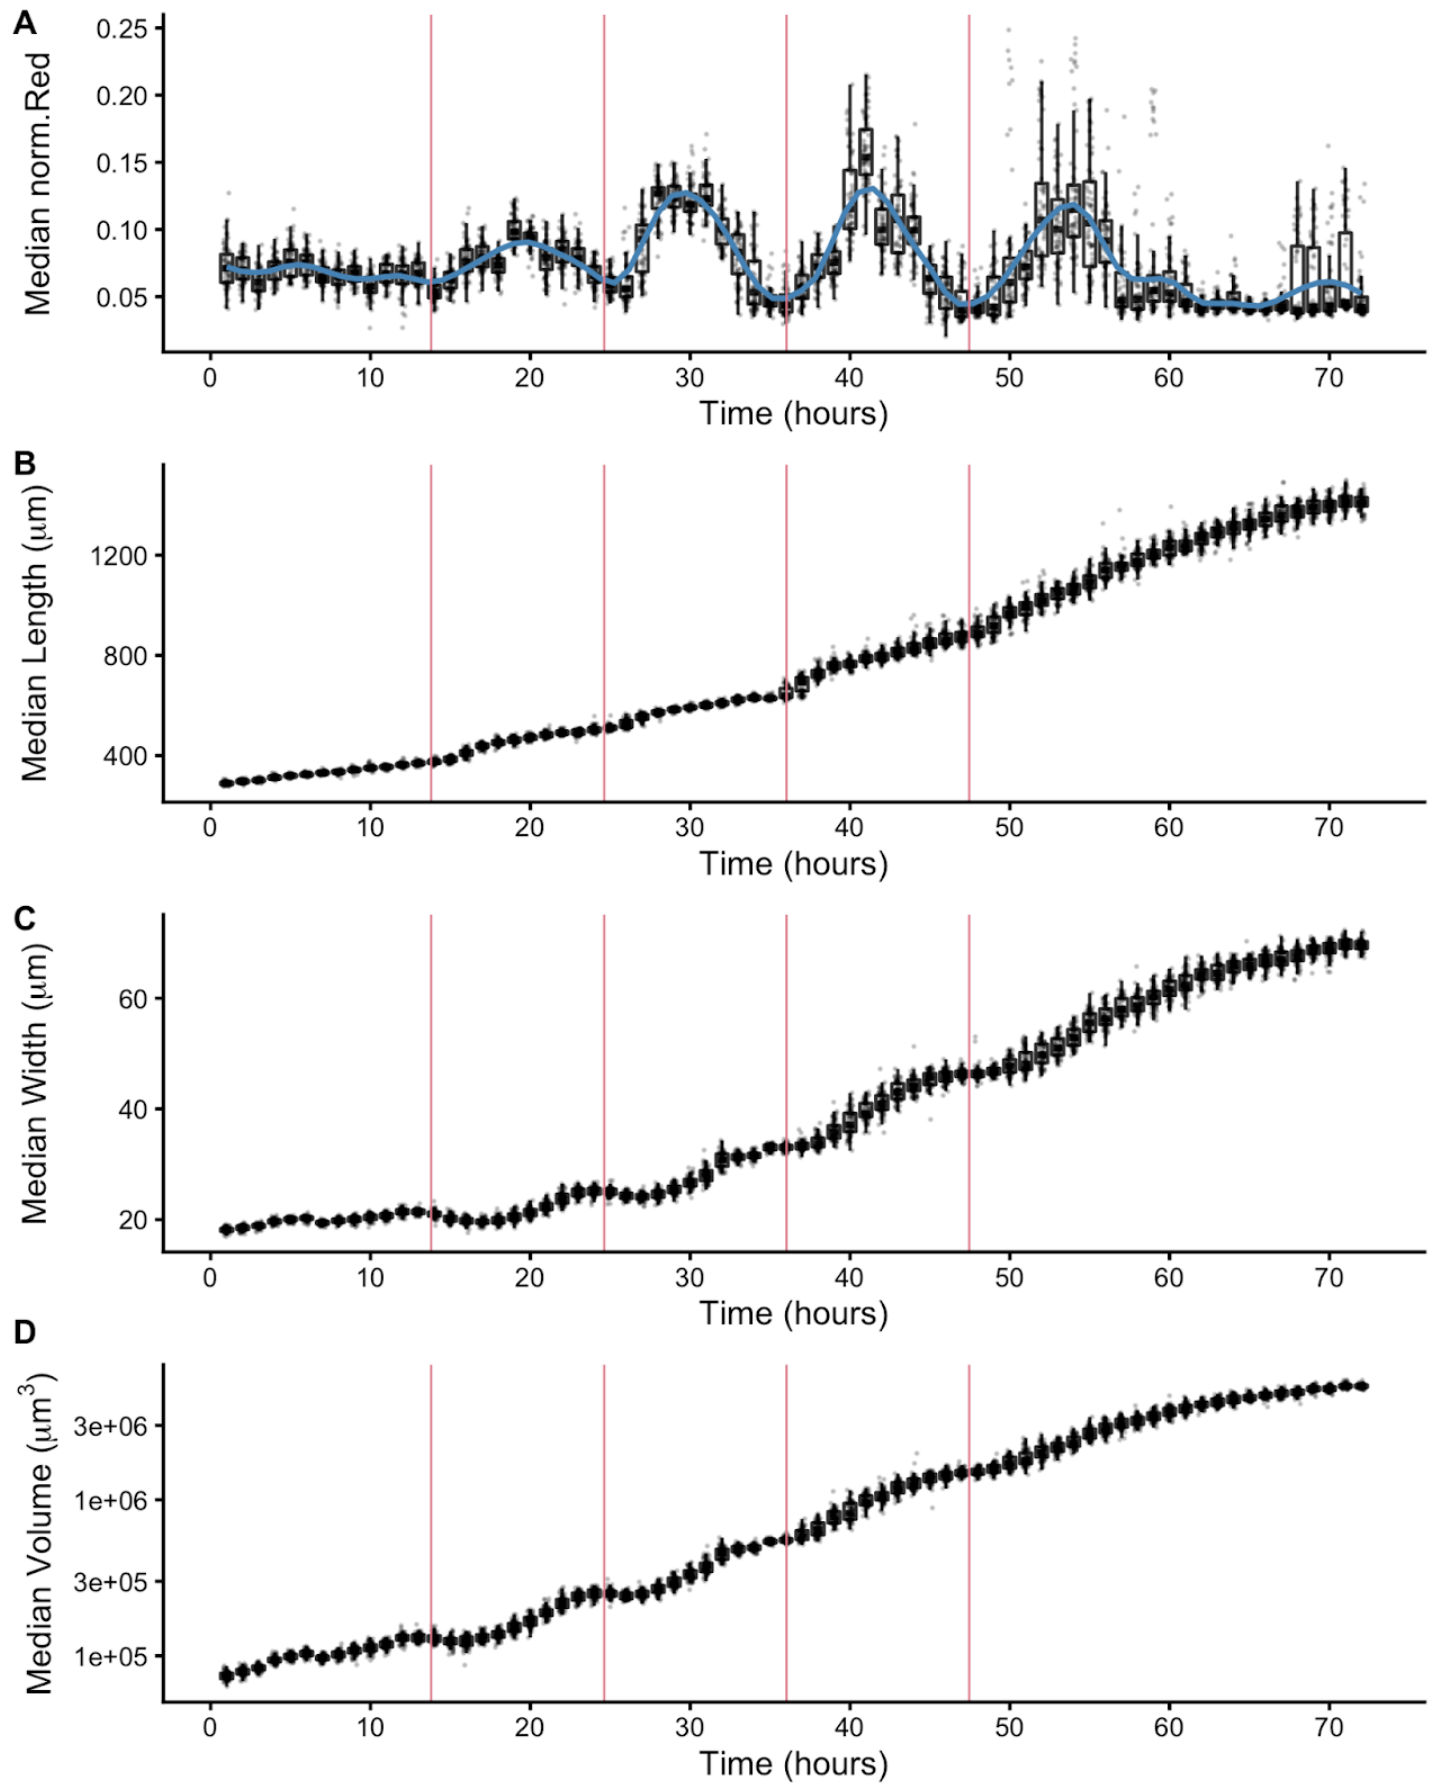



200 **Fig 3. Fluorescence dynamics outline larval stages.**

201 (A) Median normalized red fluorescence (y-axis) over time (x-axis) is shown. The blue line represents the  
202 kernel regression fit to the data. The red vertical lines correspond to the local minima of the regression and  
203 represent the transition between larval stages. Median length (B), median width (C), and median log volume  
204 (D) are shown with larval-stage transitions as well. Upper and lower bounds of the box plots correspond to the  
205 first and third quartiles. The upper and lower whiskers extend to 1.5 times the value of the interquartile range.

206 **Changes in *C. elegans* body shape occur at larval-stage transitions**

207 Adult body size is ultimately determined by the coordination of developmental progression and rate of growth.  
208 To understand how *C. elegans* achieve final size, we must first examine how *C. elegans* grow. Quantitative  
209 studies of *C. elegans* growth frequently assess changes in length or volume over time; however, to fully  
210 characterize changes associated with growth, it is also important to consider the dynamics of width. Two  
211 general models were proposed for *C. elegans* growth in volume: linear and exponential (Byerly et al., 1976;  
212 Knight et al., 2002; Uppaluri and Brangwynne, 2015). Notably, these volume growth models require different  
213 dynamics in length and width. To achieve linear volume growth, length and width must increase at precise  
214 sublinear rates that together result in a linear increase in volume. If animal length and width increased at a  
215 constant linear rate, then volume would increase at a cubic rate. Alternatively, if both length and width grew  
216 exponentially, then volume would fit an exponential model. We sought to identify which model best described  
217 *C. elegans* growth behavior but were unable to consistently distinguish between linear, exponential, and cubic  
218 models using statistical information criterion because of the similarity in the shapes of the growth curves (S6  
219 Fig and S2 Table). This result is not surprising because computational simulations have shown that increases  
220 in experimental noise, above 2% added noise, limit the correct identification of growth models (Vuaridel-Thurre  
221 et al., 2020).

222 Growth has important implications for how animals regulate size. Size homeostasis requires that growth rate  
223 and developmental rate are coordinated. *C. elegans* reach a similar volume at each larval transition despite  
224 significant variation in individual growth rates (Uppaluri and Brangwynne, 2015). Because individuals in a  
225 population maintain similar sizes despite differences in growth rate, a control mechanism to regulate  
226 developmental progression must exist. Early work proposed a size-based growth control model in *C. elegans*

227 (*Uppaluri and Brangwynne, 2015*), while recent work suggests that size homeostasis is achieved through a  
228 folder mechanism where growth rate and development are coupled (Towbin and Grosshans, 2021). To assess  
229 changes in body size and shape during a larval transition, we examined the dynamics of animal length, width,  
230 and volume in the hours before, during, and after each molt. We find that for each shape variable, larger  
231 animals enter molt first (Fig 4). We also observe differences in the distributions of lengths during a larval  
232 transition compared to widths and volumes. Measurements of animal width and volume remain unimodal  
233 throughout a molt, but length does not. As larger animals begin to exit the molt, an increase in body length  
234 occurs that leads to the appearance of bimodality of lengths across the population. This length increase occurs  
235 simultaneously with a decrease in widths across the population. Importantly, volume remains constant while  
236 length increases and width decreases, indicating a change in body geometry not size (Fig 3 and Fig 4). These  
237 changes in the physical dimensions at each larval transition suggests that body shape, in addition to size, is  
238 involved in the control of *C. elegans* growth.

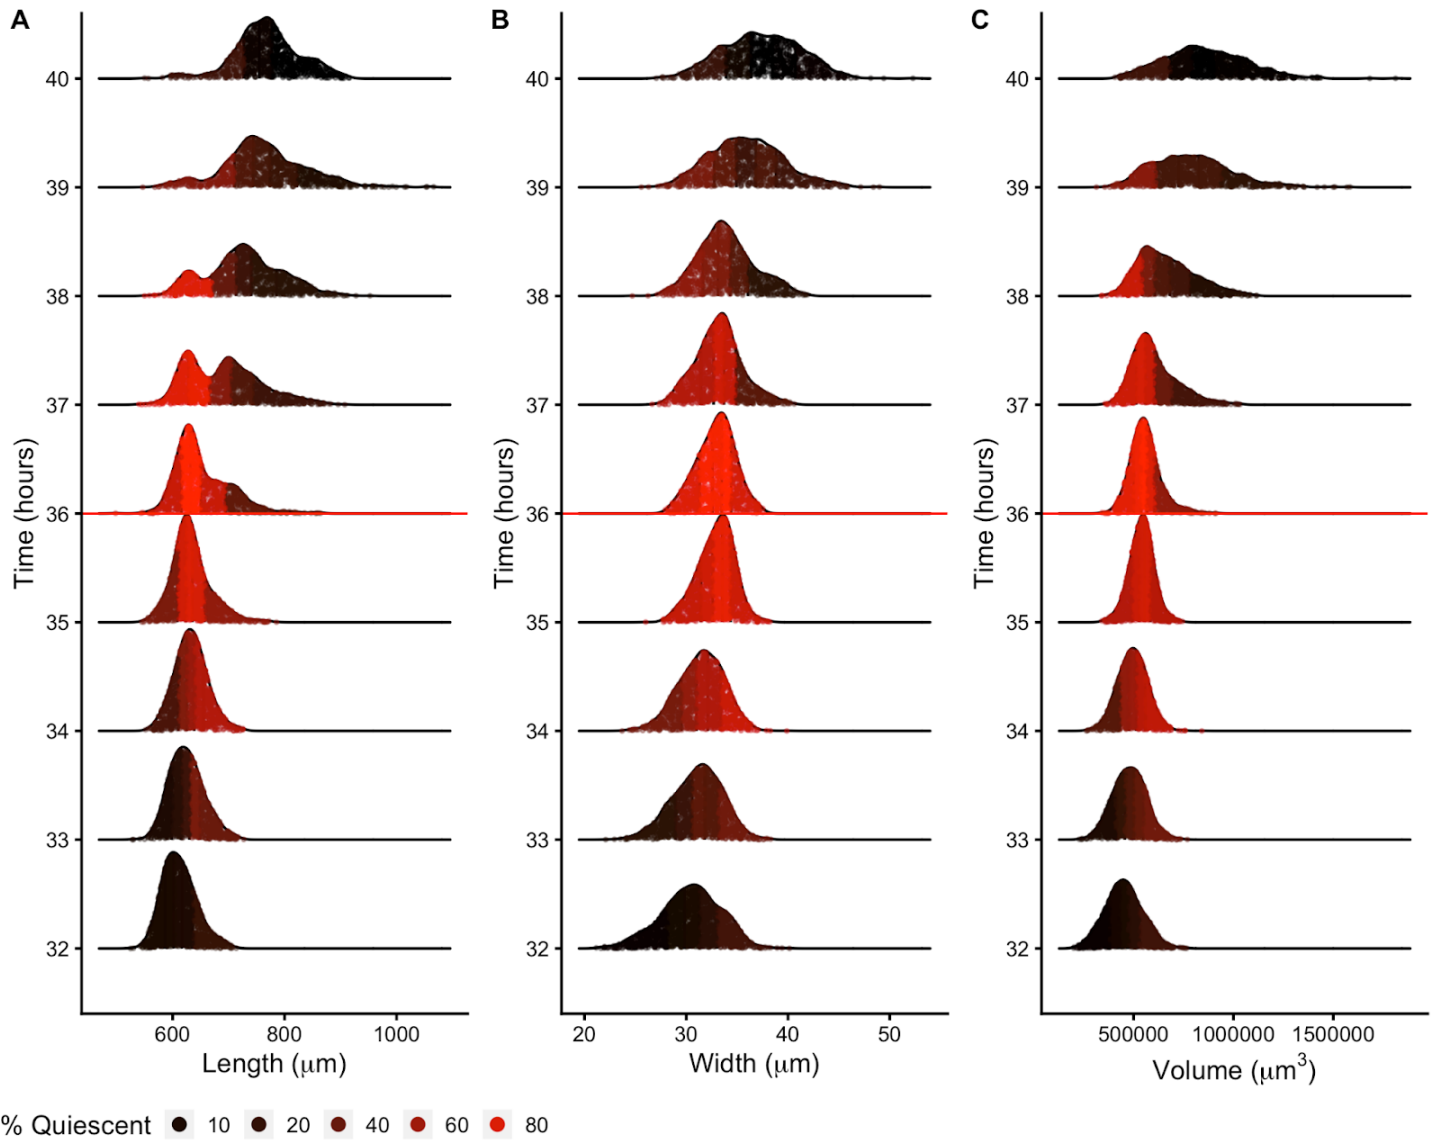

239 **Fig 4. Density plots of population size dynamics during a single larval transition.**

240 Population density curves of length (A), width (B) and volume (C) for the hours surrounding the L3 - L4 larval  
241 transition (red horizontal line at 36 hours corresponds to the molt). Each distribution was divided into five  
242 quantiles. The percentage of quiescent animals present within each quantile was calculated (see Methods),  
243 and each quantile was colored to reflect this percentage. In all shape variables, quantiles that contain the  
244 largest animals displayed an increase in quiescence earlier than quantiles that contain the smallest animals.  
245 These dynamics were consistent across all larval-stage transitions (S7 Fig).

246 **Measurements of body shape suggest that cuticle stretch determines the timing of**  
247 **larval-stage transitions**

248 Previous studies theorized that the internal mechanism for sensing body size and triggering molts in *C.*  
249 *elegans* is driven, in part, by the properties of the collagen-rich cuticle (Towbin and Grosshans, 2021; Uppaluri

250 and Brangwynne, 2015). Many cuticle collagen mutations cause morphological defects in nematode shape  
251 some of which cause animals to be shorter but do not impact animal width, implying that the cuticle affects  
252 length and width independently (Brenner, 1974). The *C. elegans* cuticle does not grow through the addition of  
253 new material, but rather stretches to accommodate increases in animal body size. Cuticle stretch is likely  
254 limited by the material properties of the cuticle. The *C. elegans* cuticle is primarily made of cross-linked  
255 collagens organized into lateral ridges and circumferential bands (Page and Johnstone, 2007b). Commonly  
256 found in many biological systems, collagen-based materials are fairly flexible under low stress conditions.  
257 However, as stress increases, collagen fibrils may become elongated and orient in the load bearing direction  
258 leading to a decrease in elasticity (Holzapfel, 2017). Previous work using atomic force microscopy revealed a  
259 high level of biomechanical stiffness at the circumferential bands (Essmann et al., 2017), leading others to  
260 speculate that mechanical strain on these structures is likely adjusted as internal body pressure changes  
261 (Dodd et al., 2018). Additionally, in *nekl-3(sv3)* molting mutants, the cuticle is not properly removed from the  
262 middle part of their body, leaving the free head and tail to grow normally while the encased middle is  
263 constricted by the old cuticle to pre-molt dimensions (Yochem et al., 2015). Given this body restriction, we  
264 speculate that the old cuticle stretches beyond its tolerance, becomes stiff, and constricts the center of the  
265 nematode relative to the growing head and tail size. We hypothesize that *C. elegans* sense when the cuticle  
266 becomes restrictive and use a threshold in the reduction of elasticity or “stretchiness” of the cuticle to  
267 determine when to initiate a molt.

268 To explain the initialization of molt behavior, we developed a “Stretcher” model for a cuticle-stretch-based  
269 threshold that triggers *C. elegans* larval-stage transitions. We propose that the nematode passes through three  
270 distinct regimes related to cuticle stretch: linear stretch dynamics, non-linear stretch dynamics, and larval stage  
271 transition (Fig 5). The cuticle structure is anisotropic, possibly leading to distinct properties in the length and  
272 width directions (Cox et al., 1981; Petzold et al., 2011). We approximated the cuticle as a hollow cylinder of  
273 negligible thickness filled by the body of the nematode. Growth was modelled as internal pressure evenly

274 applied to the cuticle in all directions. We hypothesized that the cuticle responds differently during linear  
 275 stretch, nonlinear stretch, and post-molt relaxation.

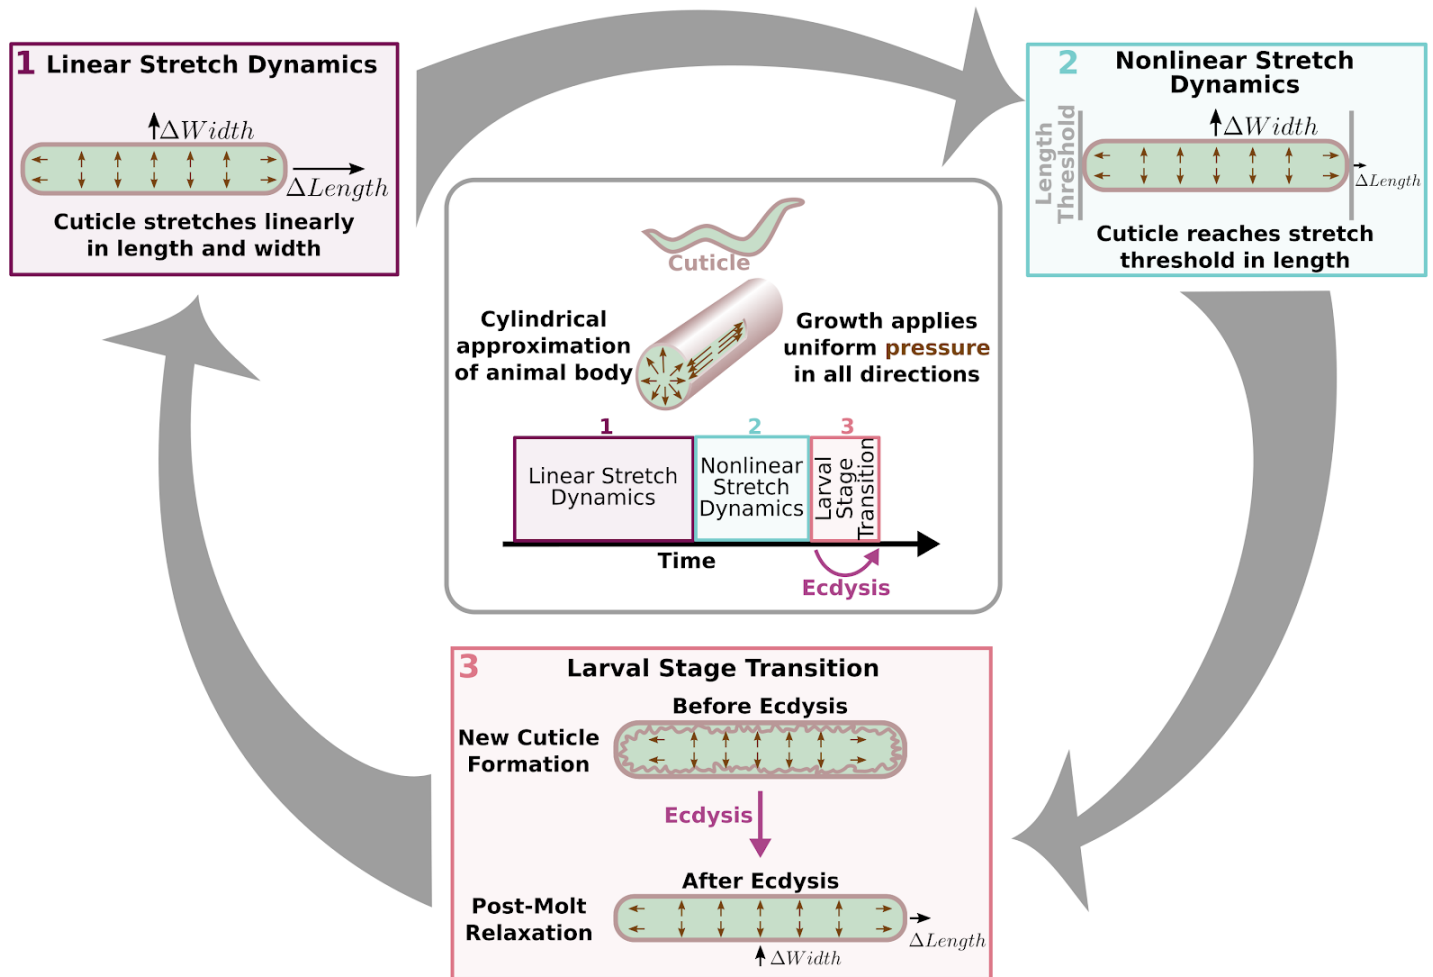

276 **Fig 5. Cuticle stretch determines larval-stage transitions**

277 The “Stretcher” model describes each larval stage as a cycle. Nematodes are modeled as a cylindrical object  
 278 with a thin cuticle epidermis. (Box 1) Linear Stretch Dynamics: uniform growth pressure stretches the cuticle  
 279 linearly in both length and width. (Box 2) Nonlinear Stretch Dynamics: the cuticle has reached a stretch  
 280 threshold in length, and under uniform growth pressure the length stretches less (sub-linear) and width  
 281 stretches linearly. (Box 3) Larval Stage Transition: a new cuticle is formed and the old cuticle is shed (ecdysis),  
 282 removing constraints in length. The nematode body “relaxes” in length, causing an increase in length, a  
 283 decrease in width, and constant volume.

284 In the linear stretch regime (Fig 5), the cuticle would be linearly elastic in both the length and width directions,  
 285 stretching proportionally to the pressure exerted on the cuticle. Previous work found evidence for a linearly

286 elastic cuticle (Gilpin et al., 2015; Park et al., 2007) in animals expanded in a negative external pressure  
287 environment or after positive force was applied to the cuticle. Gilpin *et al.* have found evidence of linear  
288 elasticity in the nematode body. We conjecture that this linear elasticity is caused by the constraints applied by  
289 the cuticle ((Gilpin et al., 2015; Park et al., 2007). A linearly elastic cuticle will have  $\Delta L$  stretch in the length  
290 direction and  $\Delta W$  stretch in the width direction, each related to growth-applied pressure  $\Delta p$  by

291 
$$\Delta L = a_L \Delta p \quad (1)$$

292 
$$\Delta W = a_W \Delta p. \quad (2)$$

293 The “stretch coefficients” in length,  $a_L$ , and width,  $a_W$ , measure the stiffness of the cuticle (S5 File, Eq.  
294 S14-S23). Smaller values correspond to a stiffer material, which is less able to stretch in response to pressure.  
295 The stretch coefficients are constant in the linearly elastic regime and are determined by geometric constants  
296 and material properties. The ratio of the change in length (Eq. 1) and width (Eq. 2) produces a  
297 pressure-independent relationship that depends only on the ratio of the geometric and material properties,  
298 which can be verified using measurements of length and width (Fig. 3). During the linearly elastic regime, the  
299 ratio of growth in width to growth in length is constant throughout a larval stage where the cuticle properties are  
300 fixed as in

301 
$$\frac{\Delta W}{\Delta L} = \frac{a_W}{a_L} = \text{constant}. \quad (3)$$

302 In the non-linear stretch regime (Fig 5), growth continues to apply pressure to the cuticle uniformly in all  
303 directions. As observed in *nekl-3(sv3)* mutants, the cuticle can restrict body growth (Yochem et al., 2015).  
304 Once outside of the linearly elastic regime, the cuticle would hardly stretch, even under large forces. We  
305 hypothesized that this shift from linear to nonlinear regimes provides a mechanism for size-sensing and cues  
306 the larval-stage transition (Fig 5). In principle, this transition could occur in either the width or length directions.  
307 For ease of presentation, we assume a transition from linear to non-linear stretch in the length direction and

308 maintains linear stretch in the width direction. In the nonlinear regime, the stretch in the length direction in  
309 response to pressure becomes

310 
$$\Delta L \approx \tilde{a}_L(p) \Delta p. \quad (4)$$

311 The nonlinear “stretch coefficient,”  $\tilde{a}_L(p)$ , is no longer constant and decreases with increasing pressure. It is  
312 smaller than  $a_L$  because the cuticle has become less elastic than in the linear regime. If the length-direction  
313 enters the nonlinear regime and has reduced stretch response, while width has the same constant stretch  
314 response then, we expect the  $\frac{\Delta W}{\Delta L}$  ratio to increase

315 
$$\frac{\Delta W}{\Delta L} |_{non-linear} = \frac{a_w}{\tilde{a}_L(p)} > \frac{a_w}{a_L} = \frac{\Delta W}{\Delta L} |_{linear}. \quad (5)$$

316 During the larval-stage transition (Fig 5), a new, larger cuticle is formed beneath the old cuticle that is shed  
317 during ecdysis. Because the old cuticle constrained growth in length, we predict a rapid increase in the length  
318 direction when the constraint is removed. Nematode volume is conserved as growth does not occur during this  
319 process. Therefore, the relaxation in length is accompanied by a corresponding decrease in width.

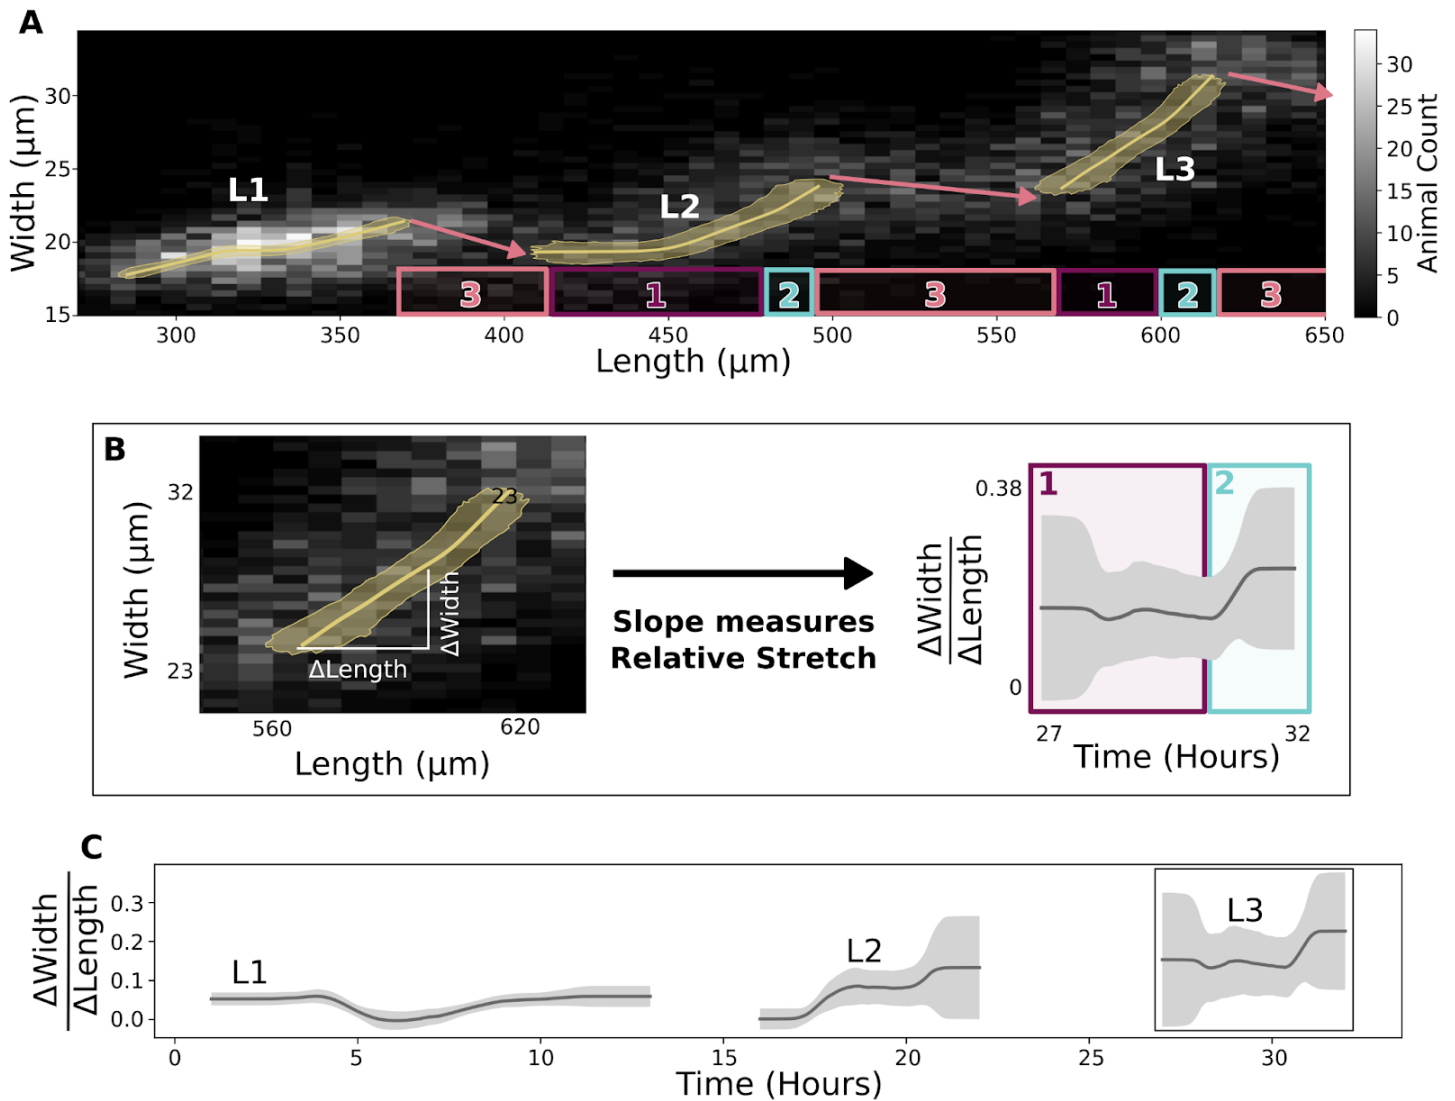

320 **Fig 6. Stretcher model analysis of replicate 2 COPAS BIOSORT data consistent with a length trigger for**  
 321 **molting**

322 (A) A grayscale histogram of the width (y-axis) vs length (x-axis) of all sampled animals in replicate 2. The  
 323 range of all bootstrap regressions is in gold. (B) Demonstration of calculating the ratio of width-to-length stretch  
 324 as the local slope using L3. Left panel is a repetition of L3 data from Fig 6A. Right panel is a repetition of  
 325 results from Fig 6C. (C) Within a larval stage, the ratio of width to length stretch varies over time. The standard  
 326 deviation captures population variation (grey) (S5 File, Eq. S26, S28).

327 To verify the shape dynamics predicted by the Stretcher model, we analyzed the relationship between  
 328 nematode length and width over developmental time. All three regimes, linear stretch, non-linear stretch, and  
 329 relaxation, predicted by the Stretcher model are detectable in the COPAS BIOSORT data (Fig 6). In all larval  
 330 stages, the instantaneous ratio  $\frac{\Delta W}{\Delta L}$  was approximately constant for the majority of the time, consistent with a  
 331 linear stretch regime (Fig 6C). We observed a large slope decrease during the L1 stage, which could



332 correspond in time to the metabolic decision for entry into the dauer stage (Golden and Riddle, 1984) or  
333 divisions of the seam cells (Sulston and Horvitz, 1977). Near the end of L2 and L3 stages, we observed a  
334 sharp slope increase, supporting our predictions of a non-linear stretch regime in length prior to lethargus.  
335 Slope transitions are difficult to detect at all larval stages due to noise amplification present in slope  
336 calculations and population effects, making the larval stage boundaries difficult to define in a consistent  
337 manner. We note that the transitions between larval stages contain the expected increase in length and a  
338 decrease in width (Fig 6A and S8 Fig) consistent with a length threshold in the Stretcher model. Though the  
339 shape relaxation for an individual animal is expected to happen at a much shorter time scale than data  
340 collection (seconds to minutes), the measured shape change within the population occurs on a larger time  
341 scale of several hours. As different individuals reach the transition points at different times, the shape change  
342 is smoothed out and difficult to observe in the time-course data (Fig 3). However, we were able to more readily  
343 observe the sudden shape change at transitions by looking at the width and length because animals of similar  
344 shape are grouped together, regardless of the time they were observed (Fig 6A). These results suggest that  
345 the material properties of the cuticle could generate a mechanical signal for the start of larval transition.  
346 Additionally, sensing when the cuticle reaches a critical stiffness would allow the animal to detect when a  
347 certain fold change occurs.

#### 348 **Mechanical control of feeding and allocation of food energy likely constrain growth dynamics**

349 We have shown that changes in physical properties of the *C. elegans* cuticle precede the decision to initiate  
350 molt and might serve as a cue for developmental timing. *C. elegans* must have mechanisms to control growth  
351 throughout development, particularly in response to these cues. Like most species, *C. elegans* do not increase  
352 their growth rate indefinitely in response to increased food availability (Uppaluri and Brangwynne, 2015). The  
353 animals could control growth entirely using feeding rate, as they actively control the feeding rate (Fang-Yen et  
354 al., 2009) and stop feeding at the initiation of a molt (Singh and Sulston, 1978). In addition to this mechanical  
355 control, they could use metabolic control to preemptively divert ingested resources toward or away from  
356 growth. Metabolic processing of stored resources could be especially useful if animals complete their molt and

357 enter a food-limited environment. For these reasons, we investigated the possible mechanical control of  
358 feeding (Fig 7) and the metabolic control of the allocation of ingested food toward organismal growth and  
359 development (Fig 8). Using a quantitative feeding model, we calculated the rate of mechanical feeding  
360 behavior from animal volume and food intake data. Additionally, we calculated an estimate for allocation of  
361 ingested food toward volumetric growth.

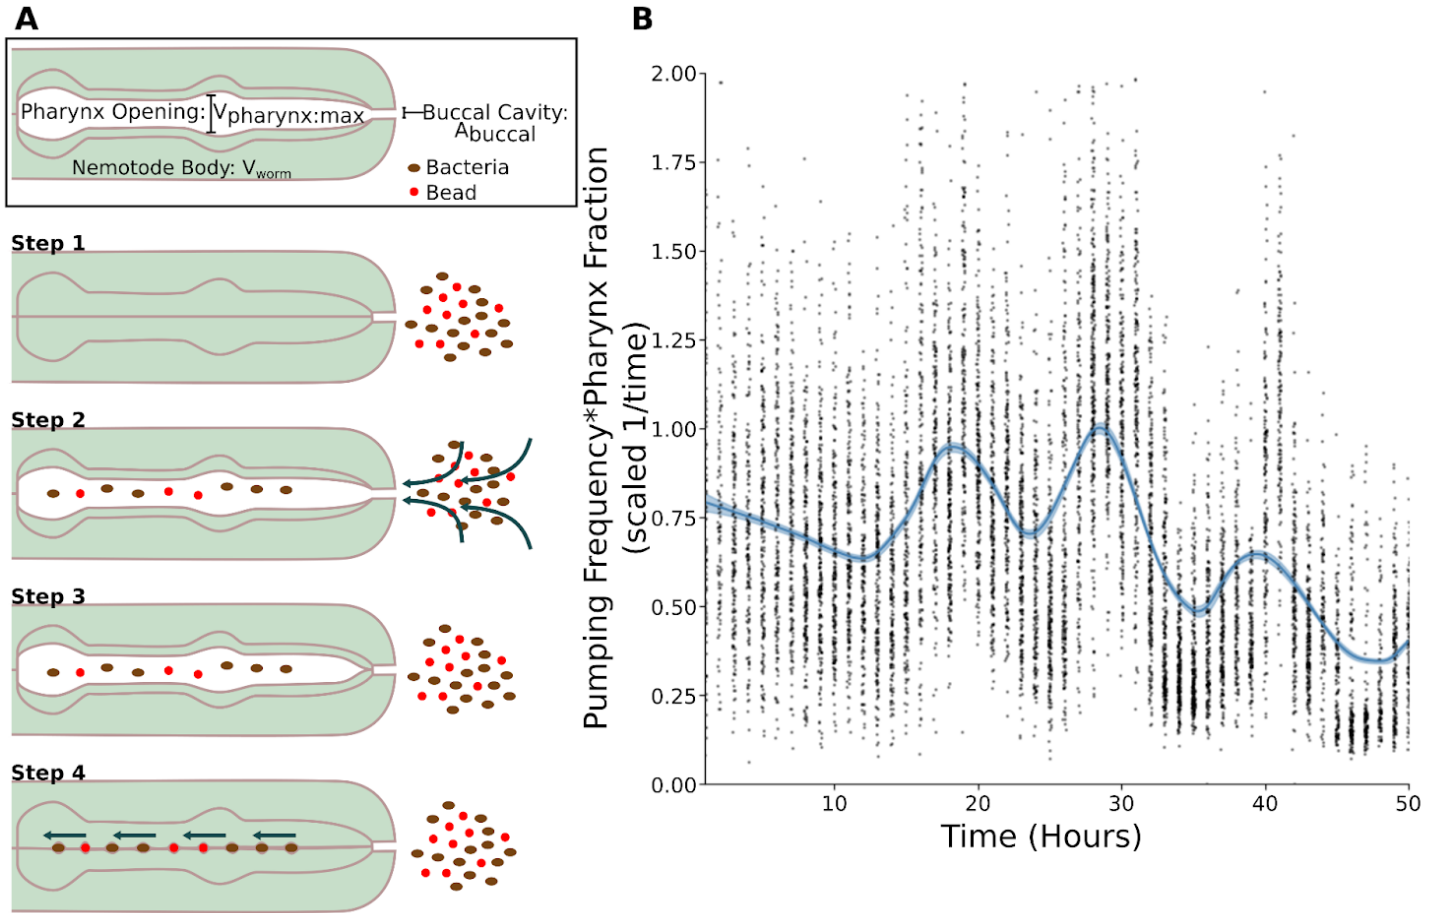

362 **Fig 7. Visualization and analysis of Feeding Model**

363 Schematics for food intake and utilization models are shown. (A) The buccal cavity is the opening through  
364 which food enters. The pharyngeal lumen is the cavity opened and closed by pharyngeal muscles that drives  
365 food intake. (B) Product of pumping frequency and pharyngeal lumen fraction,  $f(t)g(t)$ .

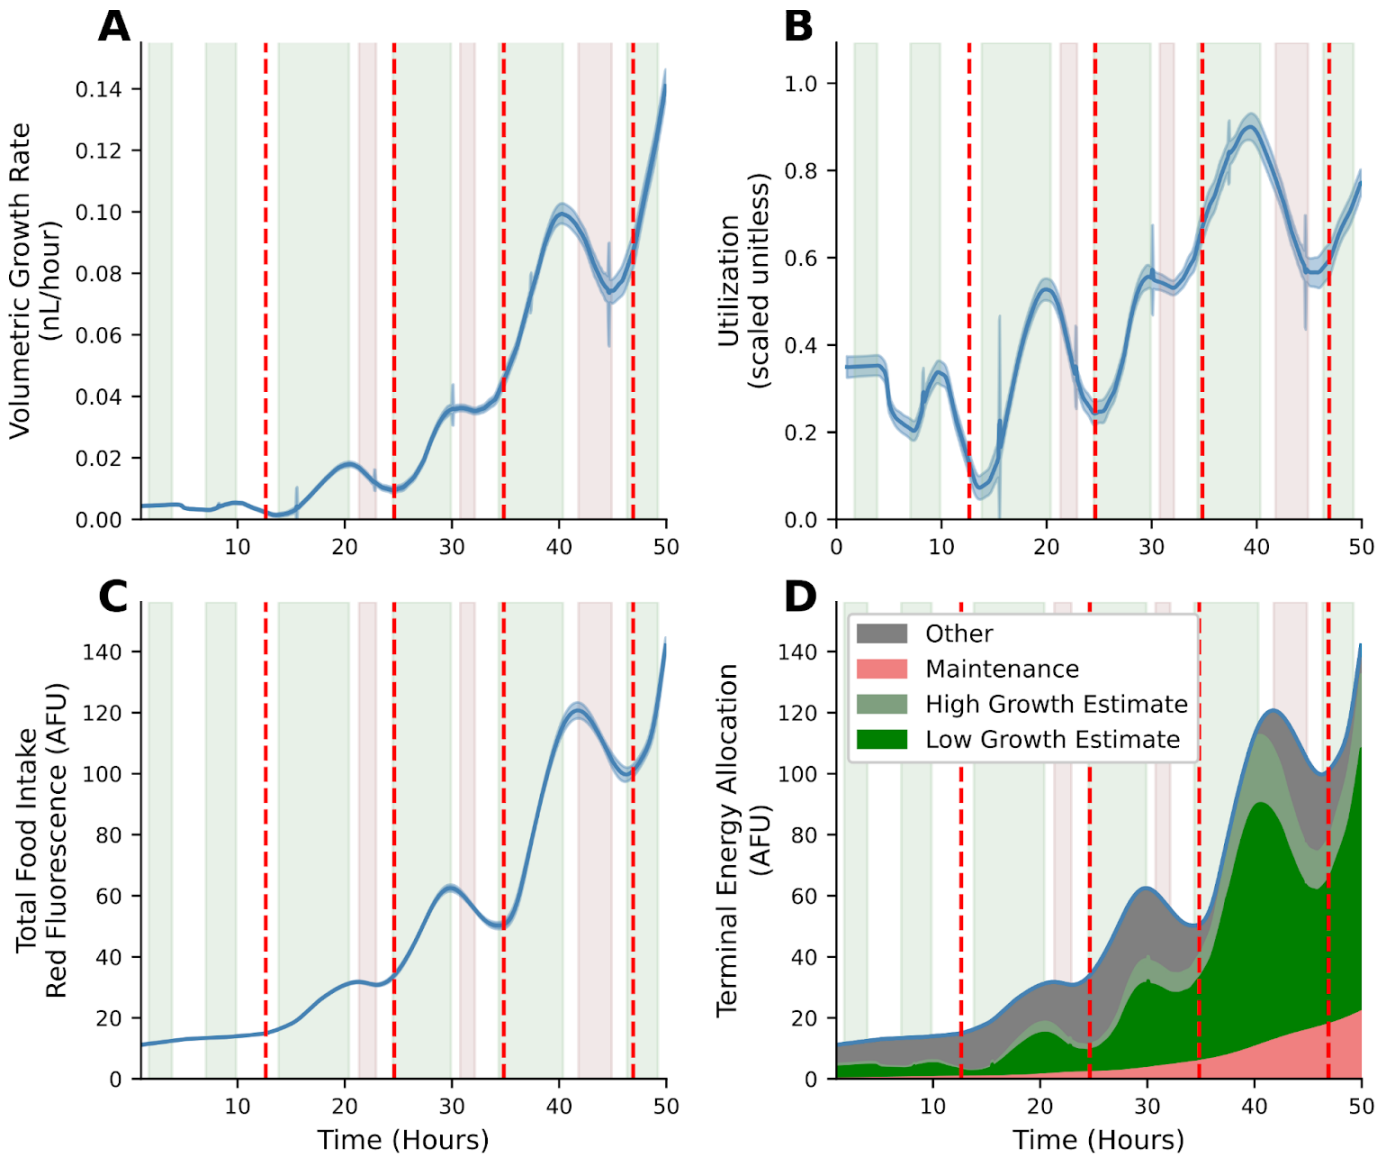

366 **Fig 8. Visualization and analysis of Food Utilization model.**

367 (A) Dynamics of volume growth rate. (B) Dynamics of the estimated food utilization towards growth ( $\alpha(t)$ ). (C)  
368 Dynamics of red fluorescence. (D) Dynamics of food allocation breakdown. Food allocated toward  
369 maintenance is proportional to animal size (pink). Food allocated toward growth is calculated from food intake  
370 (B) and utilization (C) to produce low (dark green) and high (combined green) estimates (S5 File). Food  
371 allocated to other metabolic processes consists of remaining food resources (grey). In panels A-C, the solid  
372 blue line represents the mean bootstrap regression. Standard deviation on the regression is marked by the  
373 shaded blue region. In panels A-D, Vertical red lines mark molt times. Green regions correspond to times  
374 during which volumetric growth rate and red fluorescence are both increasing, red regions correspond to times  
375 during which volumetric growth rate and red fluorescence are both decreasing, and white regions correspond  
376 to times during which volumetric growth rate and red fluorescence do not vary together. Errors on shaded  
377 regions are  $\pm 0.7$  hours. These data are from replicate 2 and are representative of all replicates (S11 Fig).

### 378 **Variation in pumping rate controls food uptake**

379 *C. elegans* is a filter feeder that pumps its food through a cycle of pharyngeal muscle contractions and  
380 relaxations that alternatively open and close the pharyngeal cavity. *C. elegans* are capable of actively  
381 modulating the length of time used to contract or open a subset of the pharyngeal muscles (Fang-Yen et al.,  
382 2009). Our feeding model describes how control of this time length and thus the control of the overall pumping  
383 period, defined as the length of time of one full pumping cycle, translates to changes in the rate of food uptake.

384 A single cycle in which animals take up and transport food to the gut consists of four general steps (Fig 7A).  
385 The cycle begins with relaxed pharyngeal muscles and a closed pharyngeal lumen (step 1). The animal opens  
386 the pharyngeal lumen so that fluid and food flow through the buccal cavity and into the pharyngeal lumen (step  
387 2). The animal cannot create a vacuum, so the volume of the cavity produced must be filled entirely by media  
388 and bacteria at the same concentration as the external environment. The animal relaxes the muscles that  
389 control the opening, stopping the flow of fluid through the buccal cavity and trapping a volume of media  
390 approximately equal to the maximum volume of the pharyngeal lumen (step 3). Finally, the pharynx closes,  
391 extruding excess media and trapping bacteria and beads that are then 'swallowed' (step 4). The period of a  
392 single cycle varies throughout the life cycle of *C. elegans* (Fang-Yen et al., 2009).

393 We find a relationship between eating rate and animal volume. It has previously been suggested that the  
394 cross-sectional area of the buccal cavity is a limiting factor in the rate of food intake (Knight et al., 2002).  
395 However, the volume of the pharyngeal lumen is filled with media each cycle, so the volume of the pharyngeal  
396 lumen, not the cross-sectional area, sets food uptake rate. We express the volume of the pharyngeal lumen as  
397 a fraction,  $g(t)$ , of nematode volume,  $V_{lumen:max}(t) = g(t) \cdot V_{worm}(t)$ . As the pumping period is much faster  
398 (roughly 200 ms in adults) (Fang-Yen et al., 2009) than the rate of measured growth (hours), we averaged the  
399 food intake rate,  $\frac{dV_{food}}{dt}$ , over a single pumping period (S5 File, Eq. S1-S6) to obtain

$$400 \quad \frac{dV_{food}}{dt} = Cf(t)g(t)V_{worm} \cdot \quad (6)$$

401 Here,  $C$  is the concentration of bacteria in the culture where animals are grown and  $f(t)$  is the pumping  
402 frequency and the inverse of the period of a single pump. Both pumping frequency,  $f(t)$ , and the fractional  
403 pharyngeal lumen size,  $g(t)$ , vary over the animal's life cycle. Though any individual bacterium may take  
404 multiple pumps to travel down to the gut, we assume that, once food has entered the pharyngeal lumen, it will  
405 eventually be metabolized. With this assumption, we are only interested in the rate at which food enters so we  
406 do not model the dynamics of food traveling through the gut.

407 We verify that red fluorescence (denoted as “*Red*”) can be treated as a proxy measurement for food intake rate  
408 given defecation rates (S9 Fig, S5 File). We use red fluorescence and calculated volume as the product of  
409 pumping rate and pharyngeal lumen fraction,  $f(t)g(t) \propto \frac{Red}{V_{worm}}$ , over time. The product oscillated within a larval  
410 stage and decreased across larval stages (Fig 7B). The minima of the product of pumping frequency and  
411 pharyngeal lumen fraction occurred during molt times, consistent with prior knowledge (Byerly et al., 1976;  
412 Singh and Sulston, 1978). The relative length of the pharynx to animal length has been shown to decrease  
413 over development (Avery, 2003) and a similar trend in the volume of the pharyngeal lumen could explain the  
414 slow decrease in the product of pumping frequency and pharynx fraction.

#### 415 **Changes in food utilization coincide with molts**

416 To understand whether animals control growth rate primarily using the mechanical feeding process or  
417 metabolic regulation, we describe how food is utilized once it is ingested by *C. elegans*. We assumed three  
418 general categories of food utilization: maintenance, observed volumetric growth, and all other processes. We  
419 assume that resources required for maintenance are proportional to the volume of the animal. Other processes  
420 may include the development of tissues and structures, such as reproductive components, within the worm  
421 which are resource intensive, but are not detected during the measurements of the width, length, or volume.  
422 The rate of food conversion to growth can be described by:

423

$$\frac{dV_{worm}}{dt}(t) = \eta(t)\alpha(t)\frac{dV_{food}}{dt}(t). \quad (7)$$

424 Here,  $\frac{dV_{food}}{dt}$  is the instantaneous rate of food intake (averaged over a single pump),  $\eta(t)$  is the metabolic  
425 efficiency of converting food to growth, and  $\alpha(t)$  is food utilization, meaning the fraction of food used for  
426 volumetric growth as opposed to maintenance or other metabolic processes. If both  $\eta(t)$  and  $\alpha(t)$  are constant,  
427 then Eq. (4) predicts the rate of volumetric growth is directly proportional to the rate of food consumption, which  
428 would be equivalent to controlling growth through feeding with no changes in metabolic regulation (through  
429 enzyme expression or other direction of flux between pathways). Efficiency captures the maximum efficiency of  
430 metabolism, and we assume it does not vary significantly when the food source is constant,  $\eta(t) = \eta$ .  
431 Therefore, utilization captures the dynamics of metabolic regulation. If the fraction of food utilized for growth is  
432 not constant, then volumetric growth rate is no longer proportional to food consumption rate and metabolic  
433 control must play a role in driving the growth rate.

434 We calculate the value of the product of metabolic efficiency and food utilization,  $\alpha(t)\eta$ , from the data by  
435 manipulating Eq. (7):

$$\alpha(t)\eta = \left(\frac{dV_{worm}}{dt}(t)\right) / \left(\frac{dV_{food}}{dt}(t)\right). \quad (8)$$

437 By using the red fluorescence as a proxy for food intake rate in Eq. (8), we can estimate the dynamical  
438 behavior up to scaling factors for the metabolic efficiency times food utilization,  $\alpha(t)\eta \propto \left(\frac{dV_{worm}}{dt}(t)\right) / Red$  (Fig  
439 8B). Because only utilization varies in time, it captures the dynamics of metabolic regulation:

$$\alpha(t) \propto \left(\frac{dV_{worm}}{dt}(t)\right) / Red. \quad (9)$$

441 Feeding rate (using red fluorescence as a proxy) and volume growth rate (numerically differentiated from the  
442 volume regression) follow similar dynamics throughout much of *C. elegans* development (Fig 8A, Fig 8C). The  
443 regressions for volume growth rate and food intake rate (as measured through red fluorescence) demonstrate  
444 a greater than 90% correlation when using synchronized populations (through the end of L4). Each larval stage

445 consists of three types of dynamics: steady growth during which food intake and growth rate are both  
446 increasing (green), preparation for molt during which food intake and growth rate are both decreasing (red),  
447 and transition regions where food intake and growth rate do not vary together (white). To illustrate how the  
448 dynamics of food intake rate and growth rate (Fig. 8A, 8C) correspond to the progression within a larval stage,  
449 consider the L3 larvae in replicate 2. At hour 24.5, both growth rate and food intake rate increased  
450 corresponding to the start of the third larval stage for the population average. Until hour 29.8, the population  
451 grew steadily, and food intake and growth rate both increased (green). Between hour 29.8 and 30.8 (white),  
452 food intake decreased and growth rate increased, marking a transition from the steady growth (green) to the  
453 molt preparation regime (red). Between hours 30.8 and 32.1, the animals prepared to initiate molts, and both  
454 the growth rate and food intake rate decreased (red). Between hours 32.1 and 34.4 (white), the animals'  
455 growth rate increased once again while the food intake rate continued to decrease corresponding to the end of  
456 the molt and start of the L4 larval stage. Similar dynamics occurred in the L2 and L3 larval stages. The L1  
457 larval stage followed different dynamics, likely due to the dauer decision or divisions of the seam cells.

458 During steady growth (green) and molt initiation (red), mechanical food intake rate and allocation of food  
459 resources towards observable growth have similar dynamics. At transition points (white) the allocation of food  
460 resources towards growth,  $\alpha(t)$ , reaches a local minimum or maximum (Fig 8B). These local extrema in  $\alpha(t)$   
461 at transition points likely indicate large changes in metabolic regulation. One might expect growth rate to lag  
462 food intake, but time-lag analysis showed no consistent lag across L1 to L4. During the L1 and L2 stages,  
463 volume growth rate lagged behind food intake rate (with correlation ~86%); during the L3 and L4 stages, food  
464 intake rate lagged behind growth rate (with correlation ~94%) (S14 Fig). The switch to food intake lagging  
465 growth rate at later larval stages might be indicative of increased regulation of resource allocation.

466 One might assume that the high correlation (S15 Fig) between dynamics of growth (Fig. 8A) and food intake  
467 (Fig. 8C) imply that animals control their growth rate entirely through the control of mechanical food intake rate  
468 with no variation in how food resources are allocated. Instead we saw variation in food allocated toward



469 growth,  $\alpha(t)$ , both between larval stages and within individual larval stages. We examined the dynamic range  
470 of total food intake (Fig. 8C) and the dynamic range of food allocated toward growth (combined green Fig. 8D)  
471 to quantify whether control through food intake or control through metabolic regulation play a larger role in  
472 growth regulation. Across a larval stage, both methods of regulation had dynamic ranges of the same order of  
473 magnitude. We also calculated the dynamic range within each period of steady growth (green), molt initiation  
474 (red), and transition (white) (Fig. 8). Within each region, the dynamic range of food intake and food allocated  
475 toward growth differed by a factor of 0.5 to 5, but we found no noticeable trends by region (S3 Table). It is  
476 possible that the interpolation and smoothing required to calculate derivatives necessary to this analysis are  
477 masking some sharper transitions, which could be resolved with higher resolution temporal experiments.  
478 These results suggested that both the total intake rate (governed by mechanical feeding behavior) and  
479 metabolic regulation of food resources are crucial for growth control in all regions of development. Additionally,  
480 we compared the food allocated toward other metabolic processes with food allocated toward growth over the  
481 four larval stages. Using the low growth utilization estimate, food allocated toward growth increases with an  
482 approximately 86-fold increase while the other resource allocation increases with an approximately six-fold  
483 increase. Resource requirements for other metabolic processes such as development of new tissues and  
484 animal mobility might vary much less during development than the resource requirements for volumetric  
485 growth.

486 Feeding rate and volumetric growth rate share a complex relationship with *C. elegans* development; food  
487 intake and growth rate vary together, except at larval stage transitions and possible key developmental  
488 transitions. Notably, the changes in metabolic resource allocation at the transition from increasing to  
489 decreasing growth and food intake rates (Fig 8A, 8C) occurred at approximately the same times as the  
490 increase in slope predicted as a cue for molt initiation by the Stretcher model (Fig 6). This correlation suggests  
491 that the cuticle reaches its maximum stretch in length and a metabolic decision to reallocate food resources  
492 growth occurs at the same time, supporting the hypothesis that a physical threshold in stretch triggers  
493 metabolic decisions to enter a molt (S10 Fig).



## 494 **Discussion**

495 Using an integrated image-based and flow-based phenotyping strategy to precisely evaluate feeding, growth,  
496 and molt dynamics at high replication, we detected oscillations in feeding behavior consistent with larval  
497 progressions and used these dynamics to define larval stages. We observed changes in body shape at each  
498 larval-stage transition that are consistent with differences in physical cuticle properties along length or width  
499 (anisotropy). These results suggest that animals sense their size and control molt timing by detecting the  
500 physical stretch of the cuticle. To understand whether *C. elegans* control growth using the moderation of the  
501 physical uptake of nutrients or through metabolic regulation of the allocation of consumed resources, we  
502 applied mathematical models of feeding-limited growth to our data. We predicted that the volumetric growth  
503 rate was controlled by both *C. elegans* feeding rate and other metabolic regulation and provided a modeling  
504 framework to decouple the relative effects. These results demonstrate two mechanisms by which physical  
505 constraints can influence developmental timing and growth rate.

### 506 **Cuticle stretch controls the timing of larval-stage transitions**

507 Measurement of both animal length and width allowed us to observe changes in body shape as well as body  
508 size. We propose that a stretch threshold along the body length axis acts as a trigger to larval-stage  
509 transitions. Importantly, mechanical stretch sensing could also provide organisms a way to couple the rate of  
510 growth and development to maintain a constant volume fold change within a larval stage and achieve size  
511 homeostasis within a population. In this way, smaller animals would reach a stretch limit at a smaller size as  
512 the cuticle would only stretch a percentage of its original size before reaching a threshold. A folder mechanism  
513 for *C. elegans* growth has been previously suggested (Towbin and Grosshans, 2021). For cuticle stretch to  
514 trigger larval-stage transitions, animals must either have the ability to measure the amount the cuticle has  
515 stretched or the stiffness of the cuticle. Across biological systems, cells can respond to the stiffness of their  
516 environment using mechanosensitive components (Schiller and Fässler, 2013; Wolfenson et al., 2011), but few  
517 examples in tissues or whole-organisms are known. In *C. elegans*, it has been demonstrated that

518 hemidesmosomes, which connect the cuticle and the epidermis, are mechanosensitive during embryogenesis  
519 (Suman et al., 2019; Zhang et al., 2011). Additionally, dense bodies, which connect the epidermis and muscles,  
520 are hypothesized to be mechanosensitive as well (Broday et al., 2007; Costa et al., 1997; Moerman and  
521 Williams, 2006; Zaidel-Bar et al., 2010). Changes in cuticle composition, and presumably stiffness, have been  
522 shown to also affect well known growth controlling pathways such as the BMP signaling pathway (Madaan et  
523 al., 2020). These possible mechanosensitive components could monitor the stiffness of the cuticle and be part  
524 of the signaling pathways that regulate larval-stage transitions. Further experiments are required to explicitly  
525 test whether these components control larval-stage transitions.

526 Our analysis of width-to-length ratio variation over larval stages provides a first approximation of the timing of  
527 larval-stage transition cues and cuticle stretch properties (Fig 8). The sudden increase we observed in the  
528 width-to-length ratio suggests a length stretch threshold. Interestingly, when observing the L4 to adult  
529 transition, others have detected anisotropic constriction on the transverse (width) axis followed by gradual  
530 relaxation driven by rearrangements in cortical actin networks (Katz et al., 2018). Single-worm, high frequency  
531 measurements targeting hours surrounding the sudden width-to-length ratio increase, are needed to better  
532 resolve cuticle shape dynamics. Higher time resolution would also minimize edge effects (S12 Fig), which likely  
533 caused the unpredicted width-to-length ratio increase observed at the start of larval stage L2 (Fig 8C).  
534 Measurements of animal length and width provide a total stiffness estimate but do not allow us to distinguish  
535 the contributions of cuticle stiffness from other tissues. To investigate cuticle properties, independent of other  
536 nematode tissues and organs, experiments must probe the stiffness of free cuticles.

### 537 **Physical constraints on feeding influence growth dynamics**

538 Our mechanical feeding model defines a relationship between food availability, food intake rate, food utilization,  
539 and growth rate. We distinguished between food intake rate and pumping rates by modeling the physical  
540 process of feeding. The results of our analysis are consistent with both an oscillation in pumping rates (Singh  
541 and Sulston, 1978) and a slow change in pharyngeal lumen size throughout development (Avery, 2003).

542 Previous research suggested that pumping frequencies within a larval stage are constant with sudden  
543 transitions between lethargus and pumping (Nika et al., 2016). However, we were unable to resolve sudden  
544 transitions because of the continuous smoothing of the kernel regression method used and population effects  
545 (Fig 7B). Previous work has shown that growth rate increases with increasing food availability up to a  
546 saturation limit (Uppaluri and Brangwynne, 2015). Varying bacterial concentration levels in future experiments  
547 would allow us to distinguish whether mechanical control of food intake or metabolic control of food utilization  
548 determine the upper bound on growth rate.

549 Our analysis of the relationship between growth rate and food intake rate quantified the interplay of metabolic  
550 regulation and mechanical food intake. Mechanical food intake provides the upper bound of available food  
551 resources for growth, but metabolic regulation substantially changes how much of this available food is utilized  
552 for volumetric growth across development. Local extrema in metabolic regulation dynamics coincide with the  
553 start of transition times. Within the L2 and L3 stages we observed a decoupling between growth rate and food  
554 intake dynamics (Fig. 8 white region) twice. The first of these time periods corresponds to the times at which  
555 the width-to-length ratio drastically changes and the second corresponds to ecdysis (S10 Fig). We estimated  
556 that throughout larval stages metabolic resources allocated to non-growth processes varies much less than  
557 food resources required for growth and maintenance. The oscillatory behavior of food utilization motivates the  
558 need for further metabolomic experiments to probe metabolic regulatory dynamics. Higher time resolution  
559 experiments on single animals in future experiments may be able to better resolve the existence of sudden  
560 changes in metabolic regulation.

561 In the analysis of both the Stretcher and feeding models, we found that the L1 larval stage has different  
562 dynamics than other larval stages. We observed a decrease in growth rate with no associated decrease in  
563 feeding rate, corresponding to a mid-stage resource reallocation, that does not occur in any other larval stage,  
564 possibly showing the dauer decision (Golden and Riddle, 1984) or the divisions of seam cells. Additionally,  
565 within the L1 stage, the relative stretch measured in width and length did not follow the pattern observed in

566 other larval stages. We observed a mid-stage dip in the width-to-length ratio that is otherwise approximately  
567 constant throughout the L1 stage. As animals reallocate food resources in mid-L1, they also undergo a change  
568 in shape suggesting either directed growth or structural changes to either the cuticle or animal body (Fig 3, Fig  
569 6, S8 Fig). Future experiments exploring the structural properties of cuticles at all larval stages may help to  
570 determine where the L1 shape changes originate.

## 571 **Development comprises complex interactions of growth regulation across diverse scales**

572 Our results demonstrate that *C. elegans* may use physical constraints on animal size and feeding rate to  
573 control growth rate and determine developmental transitions. This type of regulation could be applicable to  
574 organisms with stiff cuticles or other physical barriers to growth, like many species of Ecdysozoa. The control  
575 of whole-organism growth requires cells, tissues, and organs to orchestrate final size and cell number. In *C.*  
576 *elegans*, cell number is precisely defined and invariant from animal to animal (Horvitz and Sulston, 1980), so  
577 the final adult size of an individual must come from cell size as opposed to number. Future studies should  
578 focus on how whole-organism size is determined by the integration of cell, tissue, and organ size. By  
579 incorporating these different developmental scales, the Stretcher model can be refined to completely describe  
580 how physical constraints on parts of the organism impact the whole. *C. elegans* gives investigators a method to  
581 investigate animal-to-animal variation in developmental trajectories across each of these scales.

## 582 **Methods**

### 583 **Worm culture**

584 The canonical laboratory strain N2 was obtained from the *C. elegans* Natural Diversity Resource (Cook et al.,  
585 2016). Animals were cultured at 20°C on 6 cm plates of modified nematode growth media (NGMA), which  
586 contained 1% agar and 0.7% agarose seeded with *E. coli* OP50 bacteria (Andersen et al., 2014).

## 587 **Bacterial food**

588 *E. coli* HB101 bacteria were prepared from cultures grown for 15 hours in Superbroth and then pelleted by  
589 centrifugation. HB101 bacteria were diluted to OD100 in K medium (51 mM NaCl, 32 mM KCl, 3 mM CaCl<sub>2</sub>,  
590 and 3 mM MgSO<sub>4</sub> in distilled water) and stored at -80°C. Bacteria were thawed and fed to animals at a  
591 concentration sufficient to sustain population growth from hatching to adulthood (OD20).

## 592 **Growth of the animals**

593 Populations of animals were propagated on NGMA plates for two generations without starvation. In the third  
594 generation, gravid adults were bleach-synchronized (Stiernagle, 2006). Embryos were resuspended in K  
595 medium, aliquoted into a 500 mL flask at a concentration of one embryo per  $\mu$ L, and allowed to hatch  
596 overnight. The following day, arrested L1s were fed HB101 bacteria at a final concentration of OD20 in a final  
597 flask volume of 100 mL K medium and HB101 food. Animals were grown for three days at 20°C with constant  
598 shaking. Following these three days, adult animals were bleach-synchronized once more and embryos were  
599 aliquoted to seven replicate 500 mL flasks at a concentration of one embryo per  $\mu$ L in 100 mL. The following  
600 morning, six flasks were fed HB101 bacterial food at a final concentration of OD20 in a final flask volume of  
601 100 mL K medium and HB101 food. Two additional flasks were included to control for L1 animal size and  
602 possible clumping of bacterial food: one flask contained L1 larvae but did not have food added and one flask  
603 contained no larvae but the same concentration of HB101 bacteria as the six flasks containing L1 larvae. All  
604 replicate flasks were kept in an incubator at 20°C with shaking for the duration of the experiment. A small  
605 temperature gradient of 1.25°C was recorded in the shaking incubator with the highest temperature readings  
606 on the right side and lowest temperature readings on the left side (S1 File). This slight variation in temperature  
607 contributed to variation in developmental rate among replicates based on position within the incubator  
608 (replicates were placed in numerical order with replicate 1 positioned on the far right side of the incubator).

## 609 **High-throughput measurements of body size and fluorescence**

610 Flasks were sampled each hour beginning one hour after feeding and continuing for 72 consecutive hours. At  
611 each hour, 500  $\mu\text{L}$  was removed from each flask and transferred to a well of a deep 96-well plate. Each flask  
612 was sampled at each time point. Fluorescent polychromatic beads (Polysciences, 19507-5) with a 0.5  $\mu\text{m}$   
613 particle size were added to each well at a final concentration of  $3.64 \times 10^8$  beads/mL and incubated at 20°C for  
614 10 minutes with shaking. Following the bead incubation, 30  $\mu\text{L}$  from each well of the deep 96-well plate was  
615 aliquoted to a 96-well microtiter plate. The process was repeated 11 times to 11 separate wells of the same  
616 microtiter plate with pipetting to mix the well contents from the deep 96-well plate. Animals were then treated  
617 with sodium azide at a final concentration of 50 mM to paralyze and prevent defecation of the ingested beads.  
618 The 96-well plate was imaged with an ImageXpress Nano (Molecular Devices, SanJose, CA) using both 2x  
619 (Nikon MRD00025) and 10x (Nikon MRH00101) objectives. The ImageXpress Nano acquires brightfield  
620 images using a 4.7 megaPixel CMOS camera. Images are stored in 16-bit TIFF format. Finally, animals were  
621 scored using a large-particle flow cytometer (COPAS BIOSORT, Union Biometrica, Holliston MA). The COPAS  
622 BIOSORT sheath flow rate was kept at a constant  $10.3 \pm 0.1$  mL per minute to reduce variability in length  
623 measurements.

## 624 **Image processing**

625 Manual measurements of animal size were performed using the free Java image-processing program ImageJ  
626 (Abràmoff et al., 2004). Well images for the six replicate flasks, excluding controls were loaded into ImageJ  
627 software. Length was measured from head to tail, and width was measured at the widest point of the animal.  
628 Five animals were measured per well across thirty total wells for each hour. Measurements were repeated for  
629 all 72 time points in the assay. Body length and width were used to estimate cross-sectional area  
630 (length\*width). This metric was used to describe animal area for the extent of the text. Volume was calculated  
631 from body length and width by approximating the animal as a cylinder. Pixels were converted to  $\mu\text{m}$  using a  
632 conversion factor of 3.2937 pixels/ $\mu\text{m}$ .

## 633 **Data processing**

634 The COPAS BIOSORT was used to collect measurements of animal length (TOF), optical extinction (EXT),  
635 and fluorescence for every animal in each well. These traits measure properties of nematode development  
636 and, as such, increase as animals progress to adulthood (Andersen et al., 2015). Optical extinction  
637 measurements correspond to the amount of light absorbed over the full length of an animal as it passes  
638 through the instrument. An additional measurement (norm.EXT) can be calculated by normalizing optical  
639 extinction by length. The raw data collected were imported and processed using the *easysorter* R package  
640 (Shimko and Andersen, 2014).

641 The COPAS BIOSORT data were analyzed further using Gaussian finite mixture modeling as implemented in  
642 the *mclust* R package (Scrucca et al., 2016). These probabilistic models assume that data are generated from  
643 a mixture of multivariate normal distributions and, therefore, can be used to classify unstructured data into  
644 meaningful groups. Specifically, the *mclust* package fits a mixture model to data and selects the optimal  
645 number of clusters using an expectation-maximization algorithm and Bayes Information Criteria. For  
646 model-based clustering, log transformed animal length (logTOF) and log transformed optical extinction  
647 (logEXT) were used as inputs for the *Mclust* function. Data from each hour of the experiment was analyzed by  
648 replicate and clusters that did not appear to include majority animal objects were identified and removed as  
649 described previously (Smith et al., 2009). This processing removed non-animal objects such as bacterial  
650 clumps, shed cuticles, and next generation larval animals from the time-course data.

651 We used a numpy polyfit regression of well-median data from the COPAS BIOSORT and image measurements  
652 to convert TOF and norm.EXT data to microns (S5 File, Eq. S7-S9). Only the unit-corrected BIOSORT data  
653 were used for further analysis.



## 654 **Molt analysis**

655 Fluorescence data obtained from the COPAS BIOSORT was used as a proxy for feeding behavior to  
656 distinguish animals in a molt from growing animals. First, fluorescence was normalized by EXT to account for  
657 the ability of larger animals to consume more food and beads. Next, an analysis of variance statistical model  
658 was fit to the fluorescence data normalized by EXT to determine the amount of variance contributed by  
659 replicate and well (Table S1). A local kernel regression smoothing method was then applied to the residuals of  
660 the variance analysis using the *lokern* R package (Hermann, 2016). Residuals were used to address only the  
661 differences over time and ignore minor variation among replicates and wells. The local minima of the  
662 regression function were found by solving for where the first derivative of this function equaled zero. The time  
663 associated with each local minimum was used to represent the timing of each molt. Molts occurred at 14, 25,  
664 36, and 48 hours.

665 To identify periods of time that contained a majority of growing animals, the inflection points of the regression  
666 function were calculated by solving for where the second derivative of the function equaled zero. Time points  
667 between inflection points that did not contain a local fluorescence minimum were considered as growth  
668 periods. These hours were 1-13, 17-22, 27-32, and 39-45 corresponding to L1, L2, L3, and L4 growth periods.

669 Each molt is initiated when animals enter lethargus: a behavioral state where animals cease active feeding. To  
670 classify individual animals as in a molt or growing, we set a quiescence threshold using fluorescence  
671 measurements at each local minimum. The fluorescence measurement at each local minimum was as follows:  
672 0.07, 0.06, 0.06, 0.06. The average of these measurements (0.06) was used as the fluorescence threshold  
673 signifying quiescent behavior. Any individual animals that fell below this threshold fluorescence value were  
674 designated as in a molt and animals above this threshold value were classified as growing.



## 675 **Comparison of model fits**

676 To determine the volume growth model, we fit linear, exponential, and cubic functions to data designated as  
677 growth periods for each larval stage. Both linear and nonlinear functions were fitted using least-squares  
678 regression. Akaike's information criterion (AIC) (Sakamoto et al., 1986) and Bayesian information criterion  
679 (BIC) (Schwarz, 1978) were goodness of fit criteria used to evaluate candidate models. To assess the strength  
680 of evidence for each candidate model, we identified the model with the smallest AIC/BIC value and assessed  
681 the difference between this value and the AIC/BIC of the other two models. The magnitude of the difference  
682 was used to determine the level of support for each candidate model as previously described (Burnham and  
683 Anderson, 2007; Kass and Raftery, 1995). All model fits and analysis were performed using the *stats* R  
684 package.

## 685 **Stretcher and feeding model analysis**

686 To analyze shape dynamics, length and width data from growth time periods were extracted from the full  
687 COPAS BIOSORT population data and analyzed from each replicate separately to avoid issues with replicate  
688 variability. For replicate 2, the hours defining growth periods were 1-13, 16.37-22.39, and 26.93-32.96;  
689 corresponding to L1, L2, and L3. Hours defining larval stages were rounded as data was collected at exact  
690 hour increments. The L4 stage was excluded from the analysis because of the high variability within the  
691 population. We applied a local kernel regression, *lokern* R package ("Lokern: Kernel regression smoothing with  
692 local or global plug-in bandwidth," n.d.), to smooth the population dynamics of length and width. To calculate  
693 mean and standard deviation, the smoothed population measurements were bootstrapped using 2,000  
694 samples with replacement (S5 File, Algorithm S1). To determine cuticle properties throughout larval stages, we  
695 calculated the mean ratio of derivatives of regression width and length. Error for this ratio was calculated using  
696 error propagation to pass the bootstrap variation through the ratio (S5 File, Eq. S24-28).

697 To analyze volumetric growth dynamics and feeding dynamics, volume regression was calculated using a  
698 cylindrical approximation for animal shape (S5 File, Eq. S7-S9) and the same local kernel regression

699 previously described was applied to red fluorescence data. Volume growth rate was calculated using the  
700 python numpy gradient function applied to the volume regressions. An additional moving time window average  
701 (1.4 hours) was applied to smooth numerical errors in the derivative when determining feeding and growth  
702 regime transition points (S13 Fig).

## 703 References

- 704 Abràmoff MD, Magalhães PJ, Ram SJ. 2004. Image processing with ImageJ. *Biophotonics international*  
705 **11**:36–42.
- 706 Andersen EC, Bloom JS, Gerke JP, Kruglyak L. 2014. A variant in the neuropeptide receptor npr-1 is a major  
707 determinant of *Caenorhabditis elegans* growth and physiology. *PLoS Genet* **10**:e1004156.
- 708 Andersen EC, Shimko TC, Crissman JR, Ghosh R, Bloom JS, Seidel HS, Gerke JP, Kruglyak L. 2015. A  
709 Powerful New Quantitative Genetics Platform, Combining *Caenorhabditis elegans* High-Throughput  
710 Fitness Assays with a Large Collection of Recombinant Strains. *G3* **5**:911–920.
- 711 Avery L. 2003. Food transport in the *C. elegans* pharynx. *Journal of Experimental Biology*.  
712 doi:10.1242/jeb.00433
- 713 Baugh LR. 2013. To grow or not to grow: nutritional control of development during *Caenorhabditis elegans* L1  
714 arrest. *Genetics* **194**:539–555.
- 715 Björklund M. 2019. Cell size homeostasis: Metabolic control of growth and cell division. *Biochim Biophys Acta*  
716 *Mol Cell Res* **1866**:409–417.
- 717 Brenner S. 1974. The genetics of *Caenorhabditis elegans*. *Genetics* **77**:71–94.
- 718 Broday L, Hauser CA, Kolotuev I, Ronai Z 'ev. 2007. Muscle-epidermis interactions affect exoskeleton  
719 patterning in *Caenorhabditis elegans*. *Dev Dyn* **236**:3129–3136.
- 720 Burnham KP, Anderson DR. 2007. Model Selection and Multimodel Inference: A Practical  
721 Information-Theoretic Approach. Springer Science & Business Media.
- 722 Byerly L, Cassada RC, Russell RL. 1976. The life cycle of the nematode *Caenorhabditis elegans*. I. Wild-type  
723 growth and reproduction. *Dev Biol* **51**:23–33.
- 724 Cadart C, Monnier S, Grilli J, Sáez PJ, Srivastava N, Attia R, Terriac E, Baum B, Cosentino-Lagomarsino M,  
725 Piel M. 2018. Size control in mammalian cells involves modulation of both growth rate and cell cycle  
726 duration. *Nat Commun* **9**:3275.
- 727 Campos M, Surovtsev IV, Kato S, Paintdakhi A, Beltran B, Ebmeier SE, Jacobs-Wagner C. 2014. A constant  
728 size extension drives bacterial cell size homeostasis. *Cell* **159**:1433–1446.
- 729 Cassada RC, Russell RL. 1975. The dauerlarva, a post-embryonic developmental variant of the nematode  
730 *Caenorhabditis elegans*. *Dev Biol* **46**:326–342.
- 731 Cook DE, Zdraljevic S, Tanny RE, Seo B, Riccardi DD, Noble LM, Rockman MV, Alkema MJ, Braendle C,  
732 Kammenga JE, Wang J, Kruglyak L, Félix M-A, Lee J, Andersen EC. 2016. The Genetic Basis of Natural  
733 Variation in *Caenorhabditis elegans* Telomere Length. *Genetics* **204**:371–383.
- 734 Costa M, Draper BW, Priess JR. 1997. The role of actin filaments in patterning the *Caenorhabditis elegans*  
735 cuticle. *Dev Biol* **184**:373–384.
- 736 Cox GN, Staprans S, Edgar RS. 1981. The cuticle of *Caenorhabditis elegans*. II. Stage-specific changes in  
737 ultrastructure and protein composition during postembryonic development. *Dev Biol* **86**:456–470.
- 738 Dodd W, Tang L, Lone J-C, Wimberly K, Wu C-W, Consalvo C, Wright JE, Pujol N, Choe KP. 2018. A Damage  
739 Sensor Associated with the Cuticle Coordinates Three Core Environmental Stress Responses in  
740 *Caenorhabditis elegans*. *Genetics* **208**:1467–1482.
- 741 Donnan L, John PC. 1983. Cell cycle control by timer and sizer in *Chlamydomonas*. *Nature* **304**:630–633.
- 742 Essmann CL, Elmi M, Shaw M, Anand GM, Pawar VM, Srinivasan MA. 2017. In-vivo high resolution AFM  
743 topographic imaging of *Caenorhabditis elegans* reveals previously unreported surface structures of cuticle  
744 mutants. *Nanomedicine* **13**:183–189.
- 745 Fang-Yen C, Avery L, Samuel ADT. 2009. Two size-selective mechanisms specifically trap bacteria-sized food  
746 particles in *Caenorhabditis elegans*. *Proc Natl Acad Sci U S A* **106**:20093–20096.
- 747 Gilpin W, Uppaluri S, Brangwynne CP. 2015. Worms under Pressure: Bulk Mechanical Properties of *C. elegans*  
748 Are Independent of the Cuticle. *Biophysical Journal*. doi:10.1016/j.bpj.2015.03.020
- 749 Golden JW, Riddle DL. 1984. The *Caenorhabditis elegans* dauer larva: developmental effects of pheromone,  
750 food, and temperature. *Dev Biol* **102**:368–378.
- 751 Hermann E. 2016. lokern: Kernel Regression Smoothing with Local or Global Plug-in Bandwidth. R package

- 752 version 1.1-8. <https://CRAN.R-project.org/package=lokern>
- 753 Holzapfel GA. 2017. Similarities between soft biological tissues and rubberlike materials. *Constitutive Models*
- 754 *for Rubber IV* 607–617.
- 755 Hone DWE, Benton MJ. 2005. The evolution of large size: how does Cope's Rule work? *Trends Ecol Evol*
- 756 **20**:4–6.
- 757 Horvitz HR, Sulston JE. 1980. Isolation and genetic characterization of cell-lineage mutants of the nematode
- 758 *Caenorhabditis elegans*. *Genetics* **96**:435–454.
- 759 Hu PJ. 2018. Dauer. *WormBook*.
- 760 Jorgensen P, Tyers M. 2004. How cells coordinate growth and division. *Curr Biol* **14**:R1014–27.
- 761 Kass RE, Raftery AE. 1995. Bayes Factors. *J Am Stat Assoc* **90**:773.
- 762 Katz SS, Maybrun C, Maul-Newby HM, Frand AR. 2018. Non-canonical apical constriction shapes emergent
- 763 matrices in *C. elegans*. *bioRxiv*. doi:10.1101/189951
- 764 Knight CG, Patel MN, Azevedo RBR, Leroi AM. 2002. A novel mode of ecdysozoan growth in *Caenorhabditis*
- 765 *elegans*. *Evol Dev* **4**:16–27.
- 766 Lokern: Kernel regression smoothing with local or global plug-in bandwidth. n.d.
- 767 <https://CRAN.R-project.org/package=lokern>
- 768 Madaan U, Faure L, Chowdhury A, Ahmed S, Ciccarelli EJ, Gumienny TL, Savage-Dunn C. 2020. Feedback
- 769 regulation of BMP signaling by cuticle collagens. *Mol Biol Cell* **31**:825–832.
- 770 Madaan U, Yzeiraj E, Meade M, Clark JF, Rushlow CA, Savage-Dunn C. 2018. BMP Signaling Determines
- 771 Body Size via Transcriptional Regulation of Collagen Genes in *Caenorhabditis elegans*. *Genetics*
- 772 **210**:1355–1367.
- 773 McKeown C, Praitis V, Austin J. 1998. sma-1 encodes a betaH-spectrin homolog required for *Caenorhabditis*
- 774 *elegans* morphogenesis. *Development* **125**:2087–2098.
- 775 Moerman DG, Williams BD. 2006. Sarcomere assembly in *C. elegans* muscle. *WormBook* 1–16.
- 776 Monsalve GC, Van Buskirk C, Frand AR. 2011. LIN-42/PERIOD controls cyclical and developmental
- 777 progression of *C. elegans* molts. *Curr Biol* **21**:2033–2045.
- 778 Mörck C, Pilon M. 2006. *C. elegans* feeding defective mutants have shorter body lengths and increased
- 779 autophagy. *BMC Dev Biol* **6**:39.
- 780 Moss-Taylor L, Upadhyay A, Pan X, Kim M-J, O'Connor MB. 2019. Body Size and Tissue-Scaling Is Regulated
- 781 by Motoneuron-Derived Activin $\beta$  in *Drosophila melanogaster*. *Genetics* **213**:1447–1464.
- 782 Nika L, Gibson T, Konkus R, Karp X. 2016. Fluorescent Beads Are a Versatile Tool for Staging *Caenorhabditis*
- 783 *elegans* in Different Life Histories. *G3* **6**:1923–1933.
- 784 Osella M, Nugent E, Cosentino Lagomarsino M. 2014. Concerted control of *Escherichia coli* cell division. *Proc*
- 785 *Natl Acad Sci U S A* **111**:3431–3435.
- 786 Page AP, Johnstone IL. 2007a. The cuticle. *WormBook* 1–15.
- 787 Page AP, Johnstone IL. 2007b. The cuticle. *WormBook*.
- 788 Park S-J, Goodman MB, Pruitt BL. 2007. Analysis of nematode mechanics by piezoresistive displacement
- 789 clamp. *Proc Natl Acad Sci U S A* **104**:17376–17381.
- 790 Patterson GI, Padgett RW. 2000. TGF beta-related pathways. Roles in *Caenorhabditis elegans* development.
- 791 *Trends Genet* **16**:27–33.
- 792 Pavelescu I, Vilarrasa-Blasi J, Planas-Riverola A, González-García M-P, Caño-Delgado AI, Ibañes M. 2018. A
- 793 Sizer model for cell differentiation in *Arabidopsis thaliana* root growth. *Mol Syst Biol* **14**:e7687.
- 794 Petzold BC, Park S-J, Ponce P, Roozeboom C, Powell C, Goodman MB, Pruitt BL. 2011. *Caenorhabditis*
- 795 *elegans* body mechanics are regulated by body wall muscle tone. *Biophys J* **100**:1977–1985.
- 796 Pulak R. 2006. Techniques for Analysis, Sorting, and Dispensing of *C. elegans* on the COPAS™ Flow-Sorting
- 797 System In: Strange K, editor. *C. Elegans: Methods and Applications*. Totowa, NJ: Humana Press. pp.
- 798 275–286.
- 799 Sakamoto Y, Ishiguro M, Kitagawa G. 1986. Akaike information criterion statistics. *Dordrecht, The Netherlands:*
- 800 *D Reidel* **81**:26853.
- 801 Schiller HB, Fässler R. 2013. Mechanosensitivity and compositional dynamics of cell-matrix adhesions. *EMBO*
- 802 *Rep* **14**:509–519.
- 803 Schwarz G. 1978. Estimating the Dimension of a Model. *aos* **6**:461–464.

- 804 Scrucca L, Fop M, Murphy TB, Raftery AE. 2016. mclust 5: Clustering, Classification and Density Estimation  
805 Using Gaussian Finite Mixture Models. *R J* **8**:289–317.
- 806 Shimko TC, Andersen EC. 2014. COPASutils: An R Package for Reading, Processing, and Visualizing Data  
807 from COPAS Large-Particle Flow Cytometers. *PLoS ONE*. doi:10.1371/journal.pone.0111090
- 808 Singh RN, Sulston JE. 1978. Some Observations On Moulting in *Caenorhabditis Elegans*. *Nematologica*  
809 **24**:63–71.
- 810 Smith MV, Boyd WA, Kissling GE, Rice JR, Snyder DW, Portier CJ, Freedman JH. 2009. A discrete time model  
811 for the analysis of medium-throughput *C. elegans* growth data. *PLoS One* **4**:e7018.
- 812 Soifer I, Robert L, Amir A. 2016. Single-Cell Analysis of Growth in Budding Yeast and Bacteria Reveals a  
813 Common Size Regulation Strategy. *Curr Biol* **26**:356–361.
- 814 Spence AJ. 2009. Scaling in biology. *Curr Biol* **19**:R57–61.
- 815 Stiernagle T. 2006. Maintenance of *C. elegans*. WormBook.
- 816 Sulston JE, Horvitz HR. 1977. Post-embryonic cell lineages of the nematode, *Caenorhabditis elegans*. *Dev Biol*  
817 **56**:110–156.
- 818 Suman SK, Daday C, Ferraro T, Vuong-Brender T, Tak S, Quintin S, Robin F, Gräter F, Labouesse M. 2019.  
819 The plakin domain of VAB-10/plectin acts as a hub in a mechanotransduction pathway to promote  
820 morphogenesis. *Development* **146**. doi:10.1242/dev.183780
- 821 Sveiczzer A, Novak B, Mitchison JM. 1996. The size control of fission yeast revisited. *J Cell Sci* **109** ( Pt  
822 **12**):2947–2957.
- 823 Taheri-Araghi S, Bradde S, Sauls JT, Hill NS, Levin PA, Paulsson J, Vergassola M, Jun S. 2015. Cell-size  
824 control and homeostasis in bacteria. *Curr Biol* **25**:385–391.
- 825 Towbin BD, Grosshans H. 2021. A folder mechanism ensures size uniformity among *C. elegans* individuals by  
826 coupling growth and development. *bioRxiv*.
- 827 Tuck S. 2014. The control of cell growth and body size in *Caenorhabditis elegans*. *Exp Cell Res* **321**:71–76.
- 828 Turner JJ, Ewald JC, Skotheim JM. 2012. Cell size control in yeast. *Curr Biol* **22**:R350–9.
- 829 Tzur A, Kafri R, LeBleu VS, Lahav G, Kirschner MW. 2009. Cell growth and size homeostasis in proliferating  
830 animal cells. *Science* **325**:167–171.
- 831 Uppaluri S, Brangwynne CP. 2015. A size threshold governs *Caenorhabditis elegans* developmental  
832 progression. *Proc Biol Sci* **282**:20151283.
- 833 Uppaluri S, Weber SC, Brangwynne CP. 2016. Hierarchical Size Scaling during Multicellular Growth and  
834 Development. *Cell Rep* **17**:345–352.
- 835 Vuaridel-Thurre G, Vuaridel AR, Dhar N, McKinney JD. 2020. Computational Analysis of the Mutual  
836 Constraints between Single-Cell Growth and Division Control Models. *Adv Biosyst* **4**:e1900103.
- 837 Wang P, Hayden S, Masui Y. 2000. Transition of the blastomere cell cycle from cell size-independent to  
838 size-dependent control at the midblastula stage in *Xenopus laevis*. *J Exp Zool* **287**:128–144.
- 839 Wang P, Robert L, Pelletier J, Dang WL, Taddei F, Wright A, Jun S. 2010. Robust growth of *Escherichia coli*.  
840 *Curr Biol* **20**:1099–1103.
- 841 Willis L, Huang KC. 2017. Sizing up the bacterial cell cycle. *Nat Rev Microbiol* **15**:606–620.
- 842 Wolfenson H, Bershadsky A, Henis YI, Geiger B. 2011. Actomyosin-generated tension controls the molecular  
843 kinetics of focal adhesions. *J Cell Sci* **124**:1425–1432.
- 844 Wood WB. 1988. The Nematode *Caenorhabditis Elegans*. Cold Spring Harbor Laboratory.
- 845 Yochem J, Lažetić V, Bell L, Chen L, Fay D. 2015. *C. elegans* NIMA-related kinases NEKL-2 and NEKL-3 are  
846 required for the completion of molting. *Dev Biol* **398**:255–266.
- 847 Zaidel-Bar R, Miller S, Kaminsky R, Broday L. 2010. Molting-specific downregulation of *C. elegans* body-wall  
848 muscle attachment sites: the role of RNF-5 E3 ligase. *Biochem Biophys Res Commun* **395**:509–514.
- 849 Zhang H, Landmann F, Zahreddine H, Rodriguez D, Koch M, Labouesse M. 2011. A tension-induced  
850 mechanotransduction pathway promotes epithelial morphogenesis. *Nature* **471**:99–103.



## 851 **Data availability**

852 The authors state that all data necessary to confirm the conclusions of this work are within the text, figures,  
853 and supporting information files. All files and code for analysis and generation of figures and tables are  
854 archived on GitHub (<https://github.com/AndersenLab/C.elegans-growth-manuscript>).

## 855 **Acknowledgements**

856 E.C.A and N.M.M conceived the project. J.N., G.Z., and E.C.A designed, optimized, and performed the  
857 experiments. J.N., H.N.A, E.J.A, I.R.M, J.K.R, I.L.S., and J.A.V. collected manual size measurements of  
858 animals from images. J.N. processed the COPAS BIOSORT data to remove non-animal objects. J.N, C.G., and  
859 S.S. analyzed the results. C.G. and S.S. developed the theory and tested the models. E.C.A and N.M.M  
860 supervised the research and the development of the manuscript. J.N, C.G, and S.S. wrote the first draft of the  
861 manuscript; J.N., C.G., G.Z, N.M.M, E.C.A., and S.S. edited the manuscript. We thank Jiping Wang and Keren  
862 Li for helpful advice about statistical data analysis. We would like to thank members of the Andersen laboratory  
863 and the Mangan group for their helpful comments on the manuscript. For this work, J.N., C.G., G.Z., E.C.A.,  
864 N.M.M, and S.S. received support from the NSF-Simons Center for Quantitative Biology at Northwestern  
865 University (awards Simons Foundation/SFARI 597491-RWC and the National Science Foundation 1764421).  
866 C.G., S.S., and N.M.M. received support from the National Science Foundation RTG: Interdisciplinary Training  
867 in Quantitative Biological Modeling, award 1547394). C.G. was supported in part by the Murphy Scholars  
868 Program of the Robert R. McCormick School of Engineering and Applied Science at Northwestern University.  
869 **Competing interests:** The authors have no competing interests.

870 **Supporting Information Captions**

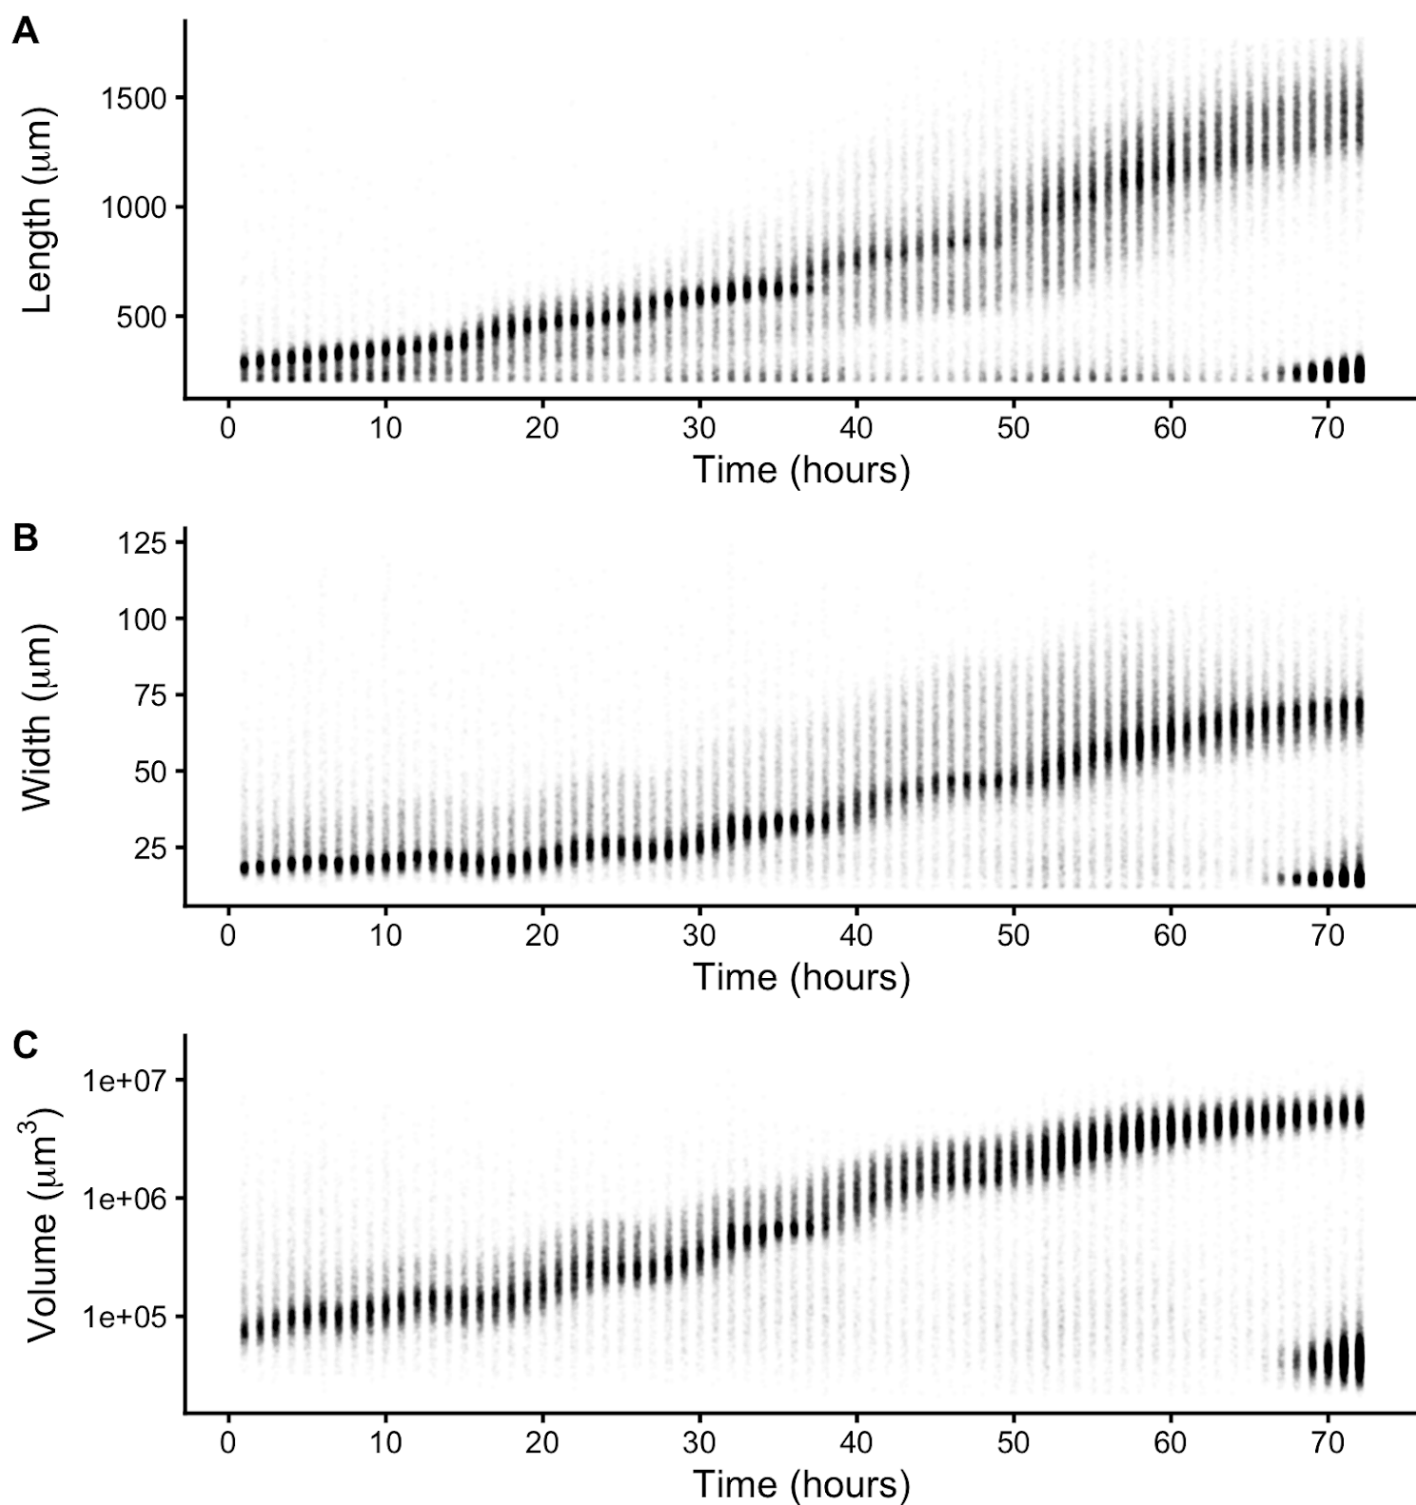

872 **S1 Fig. Raw measurements of animal size.** Raw COPAS BIOSORT data of animal length (A), width (B), and  
873 volume (C) are shown here. After 60 hours, animals have developed to the adult stage. Smaller objects  
874 observed after 65 hours were the next generation of newly hatched L1 larvae laid by the animals that  
875 developed during the time course.

876

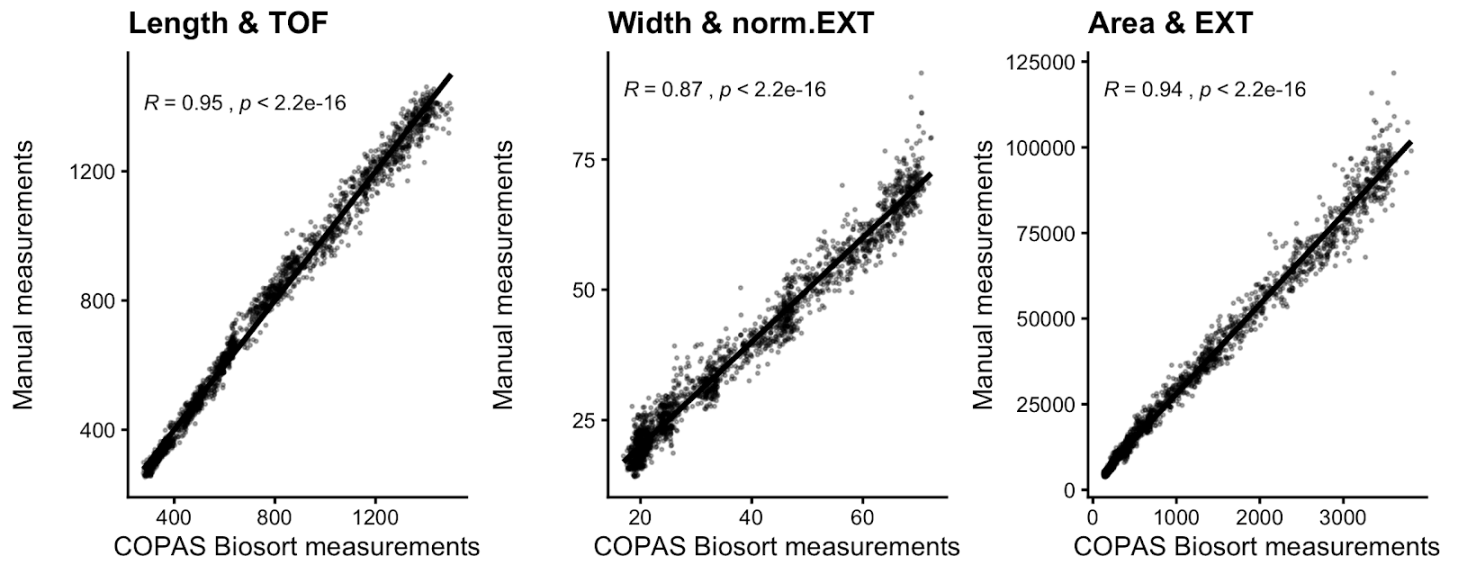

877 **S2 Fig. Correlation analysis of body size measurements.** Manual measurements of animal length, width,  
 878 and estimated area were compared to COPAS BIOSORT measurements of TOF, norm.EXT, and EXT. Kendall  
 879 correlation value is shown in each plot.

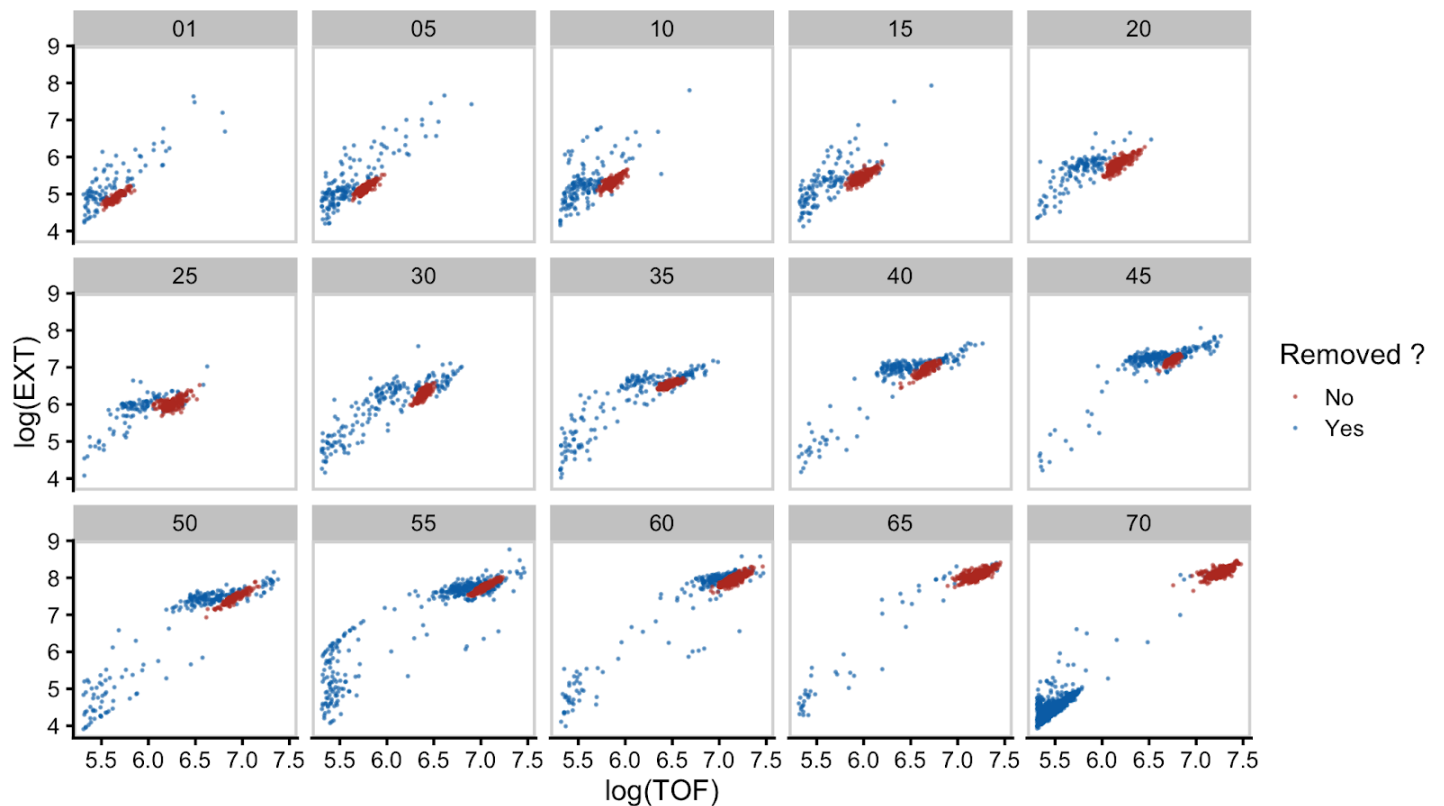

880 **S3 Fig. Mixture modeling of COPAS BIOSORT data was used to prune data.** Mixture models of Gaussian  
 881 distributions were fit to log transformed animal length (x-axis) and log transformed optical extinction (y-axis).  
 882 Data from each hour of the experiment was analyzed and processed to remove clusters that did not include  
 883 animal objects. All replicates were pruned independently; a subset of data from replicate 2 is shown here.  
 884 Panels indicate experimental hours from which data were taken.



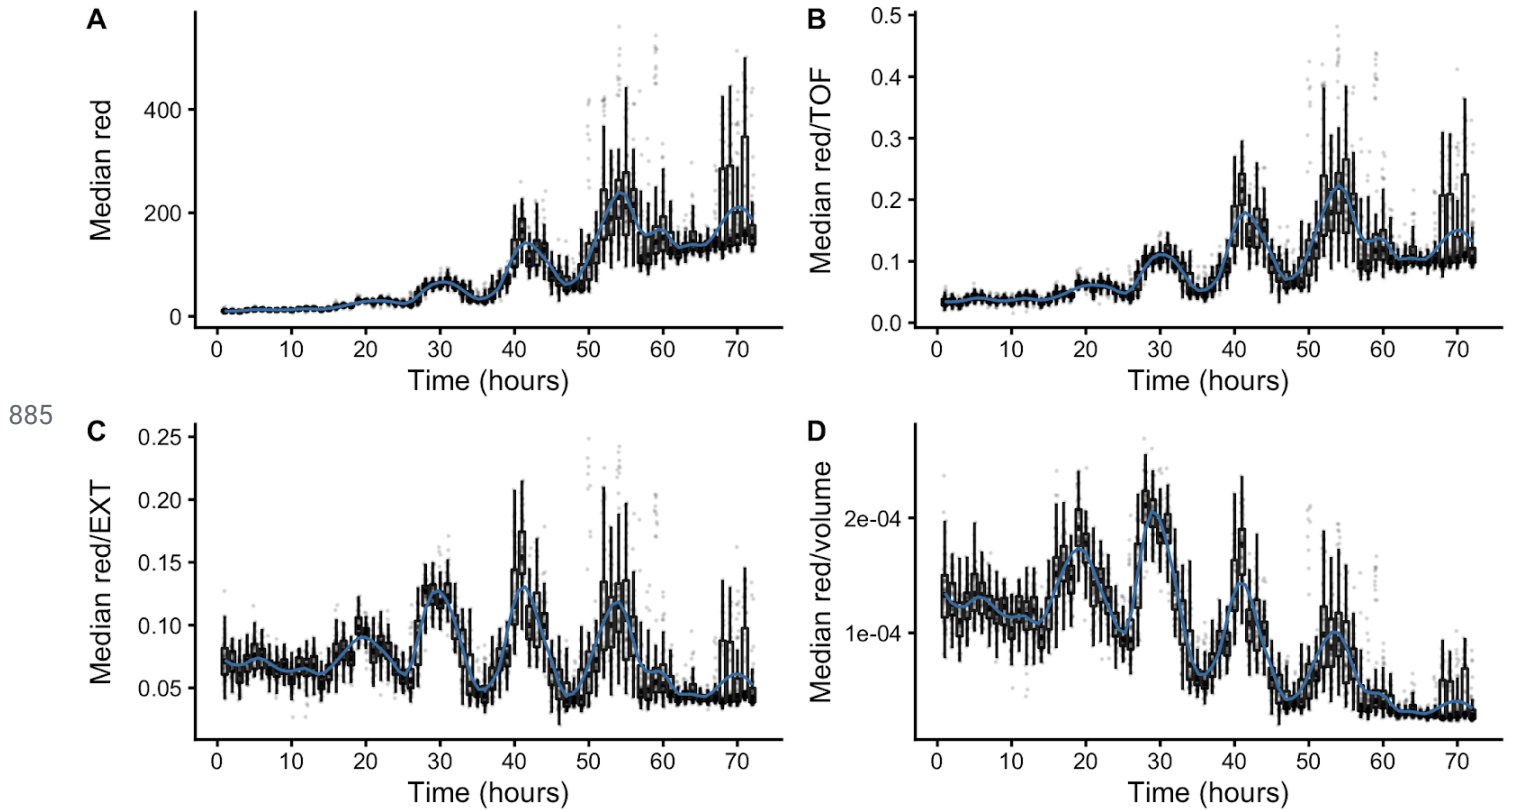

886 **S4 Fig. Fluorescence measurements normalized by body size.** Red fluorescence beads were fed to  
887 animals during experimentation and fluorescence data was collected by the COPAS BIOSORT. Fluctuations in  
888 fluorescence indicate fluctuations in feeding behavior. Fluorescence data was normalized by body size  
889 measurements to account for increases in body size. Dividing fluorescence by area was most successful in  
890 normalizing fluorescence dynamics to account for changes in animal size over time.

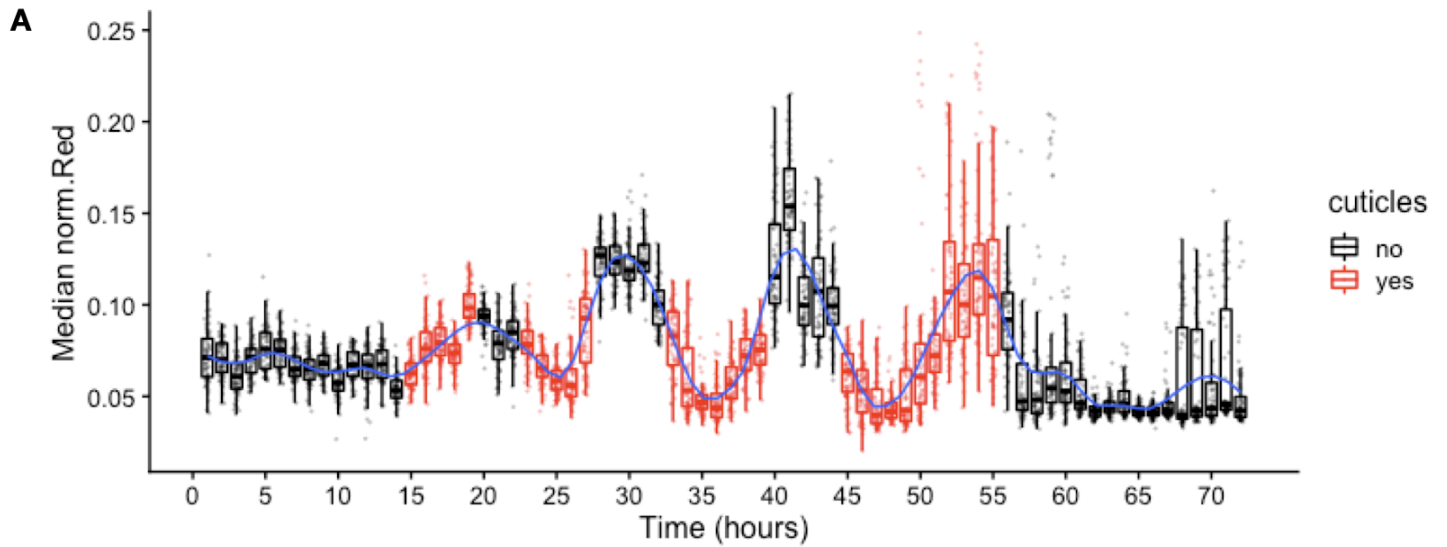

891

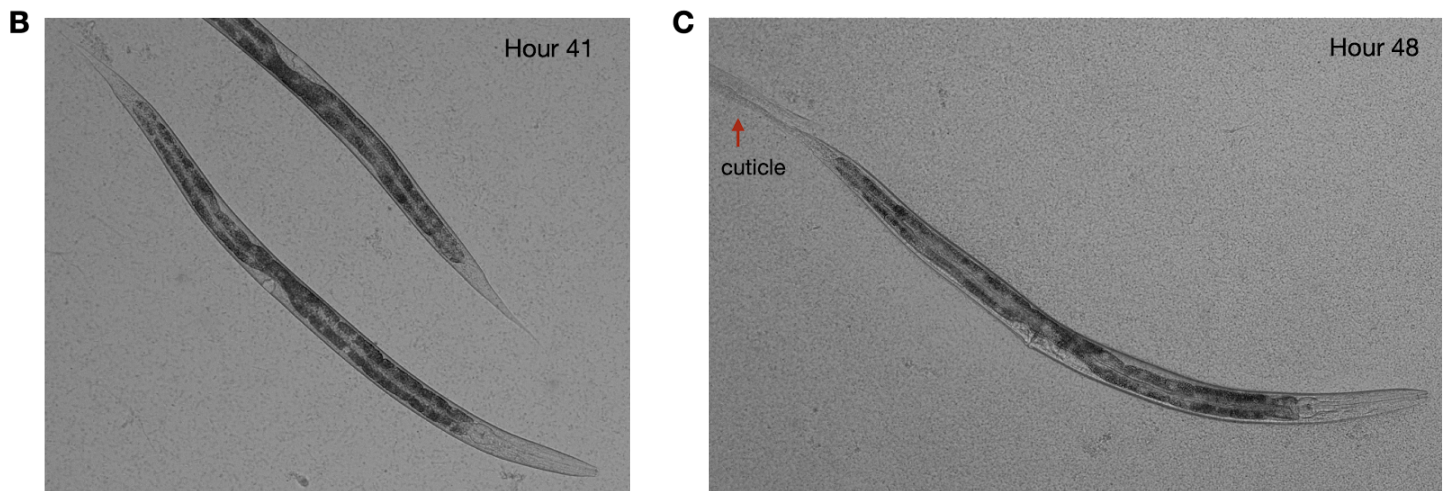

892 **S5 Fig. Cuticles identified during periods of decreased feeding.** Images of wells collected during the  
893 experiment were examined for evidence of shed cuticles. (A) Experimental hours where cuticles were identified  
894 from images overlap with hours where population feeding behavior is low. Cuticles shed from the L4-Adult molt  
895 persisted longer than previous larval stage cuticle debris. (B) Example image of animal without visible cuticle  
896 during a period of elevated feeding. (C) Example image of an animal with visible cuticle indicating completion  
897 of molt during a period of decreased feeding.

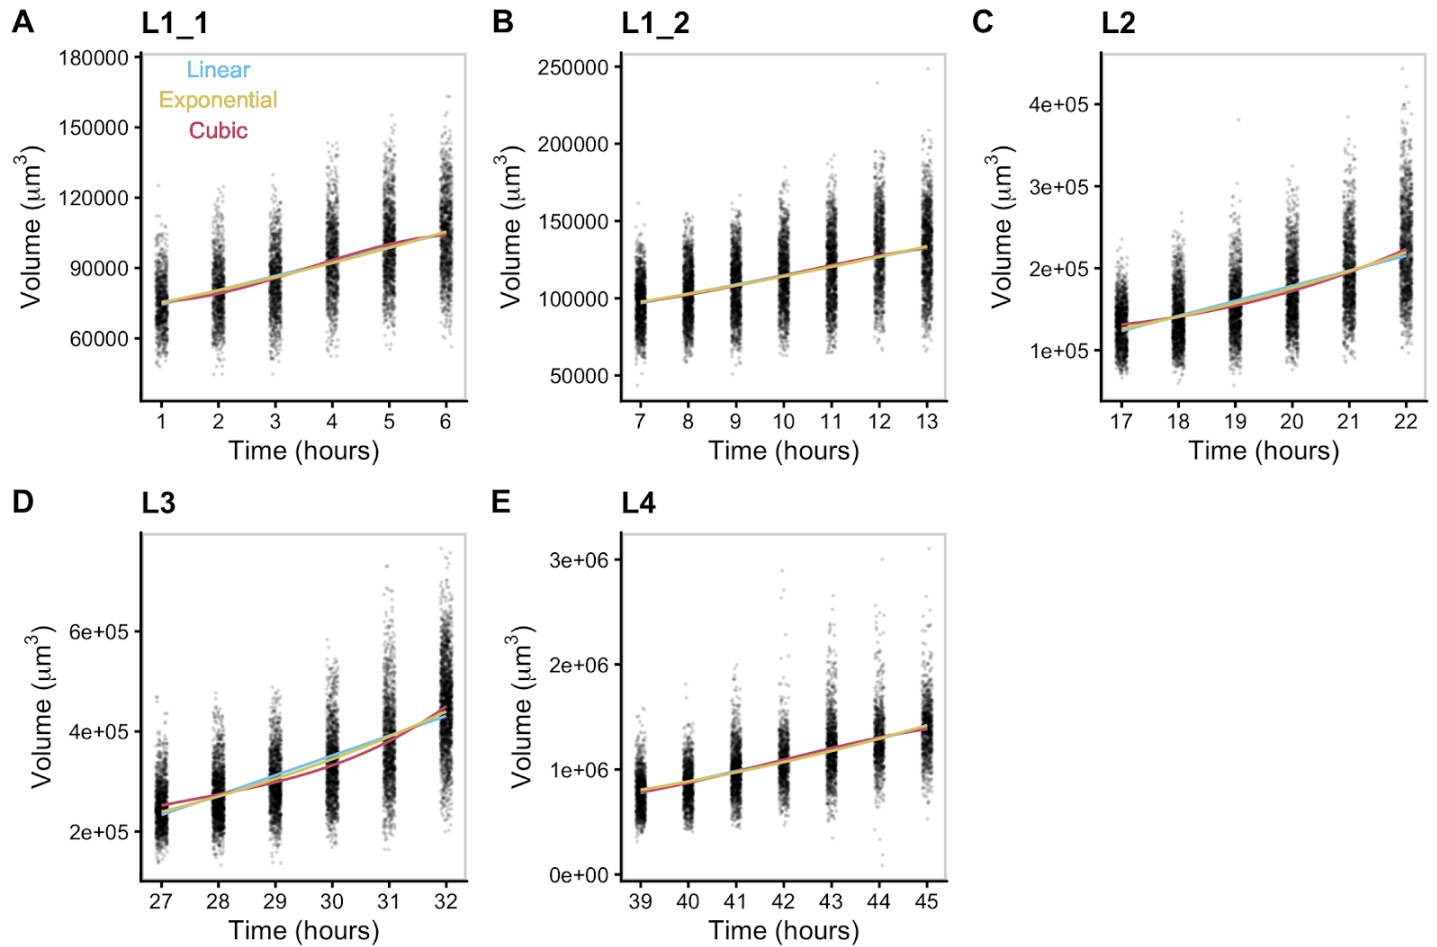

898

899 **S6 Fig. Volume growth data fit with linear, exponential, and cubic models.** Volume data of individuals in  
900 time points defined as growth periods are analyzed for each stage. L1 stage was further separated into two  
901 periods to account for the volume dip that occurs mid-stage.

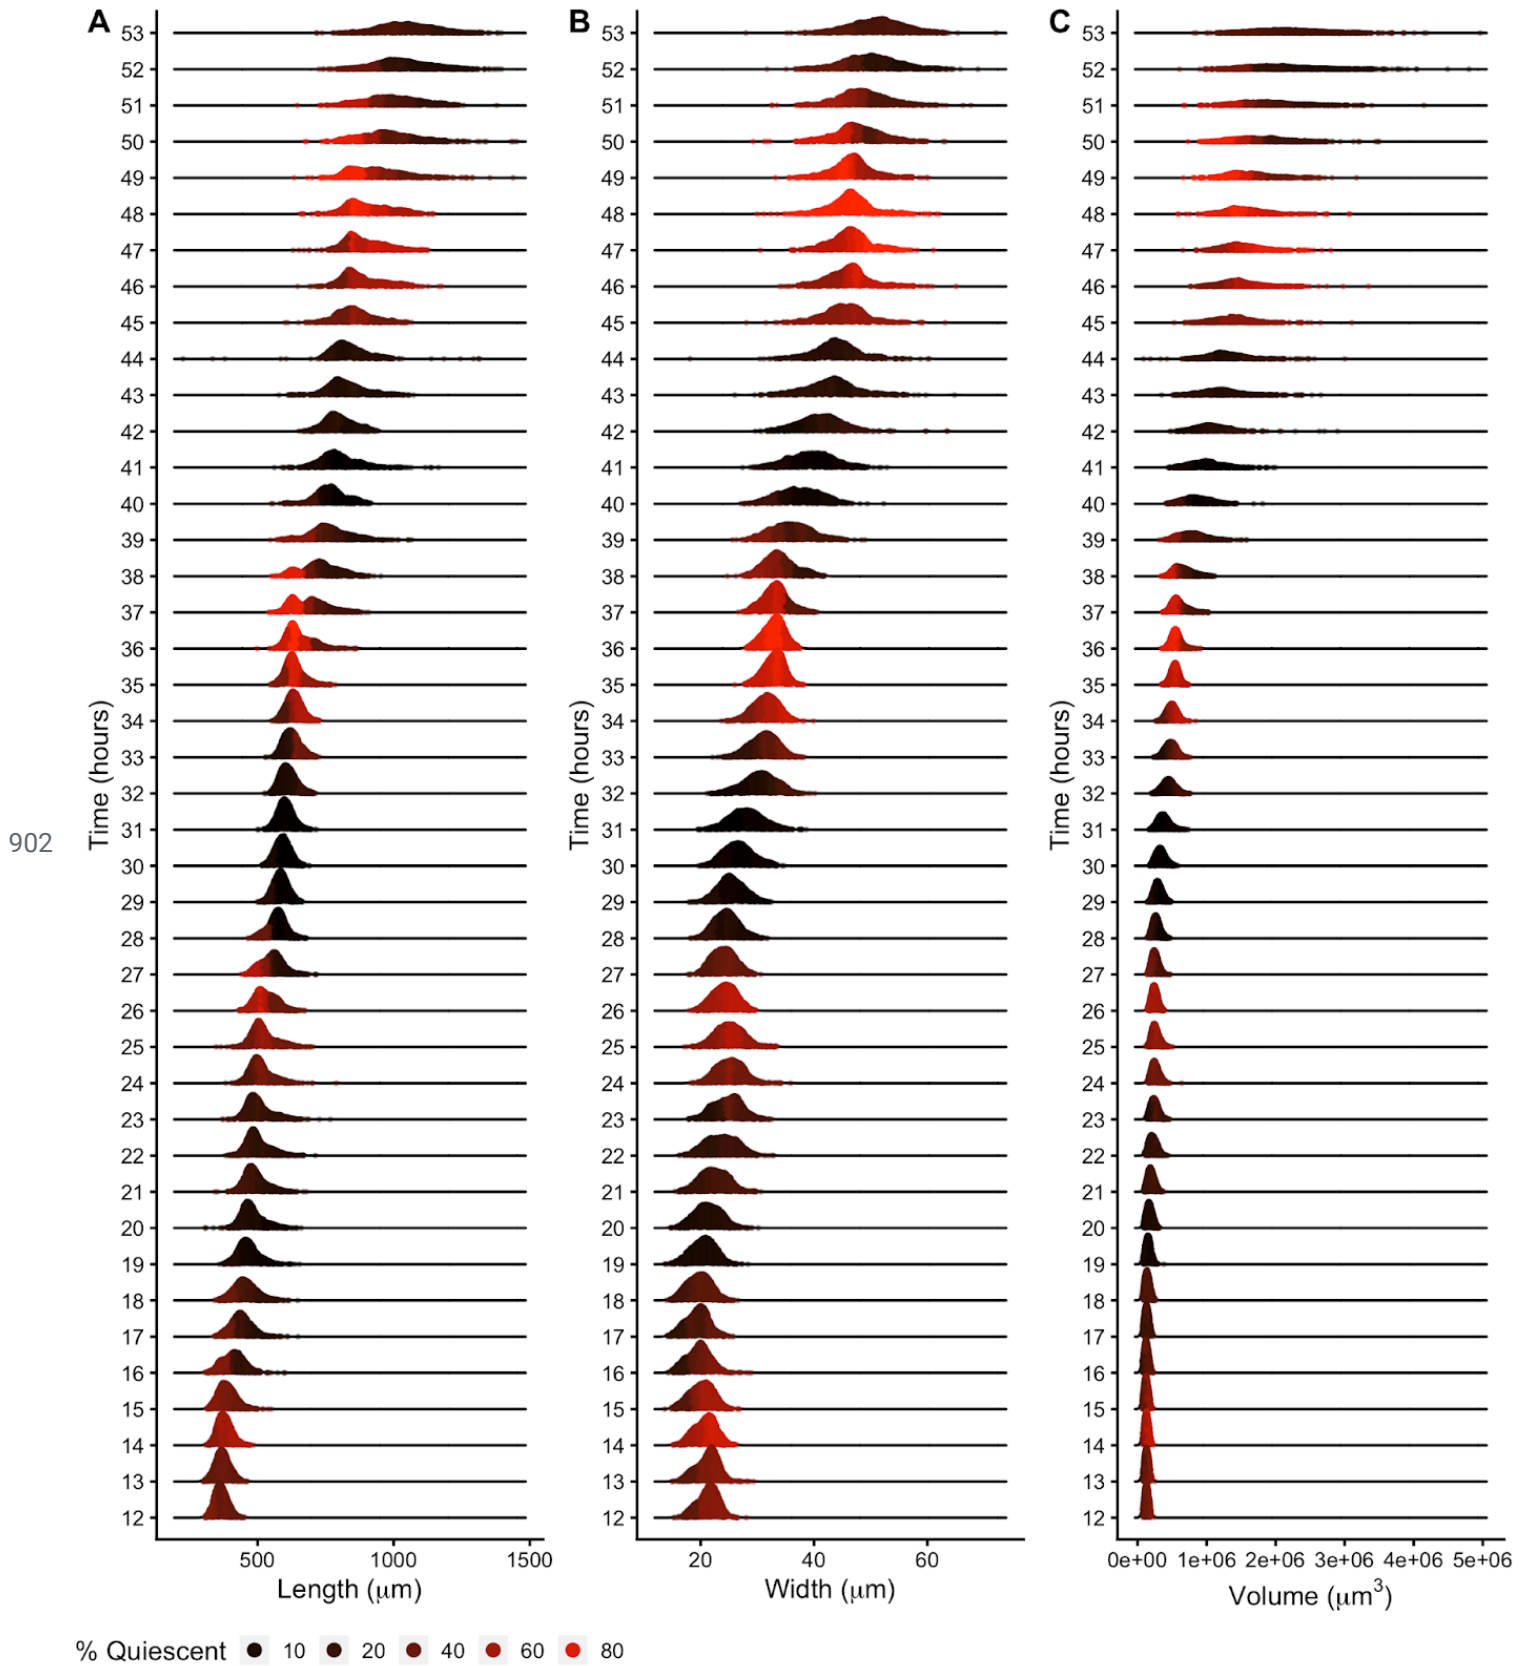

903 **S7 Fig. Density plots of population size dynamics across all larval transitions.** Density curves of length  
904 (A), width (B) and volume (C). Curves are divided into five quantiles and colored by the percentage of  
905 quiescent animals present within that quantile. Molts are estimated to occur at experimental hours 14, 25, 36,  
906 and 48 (see Methods).

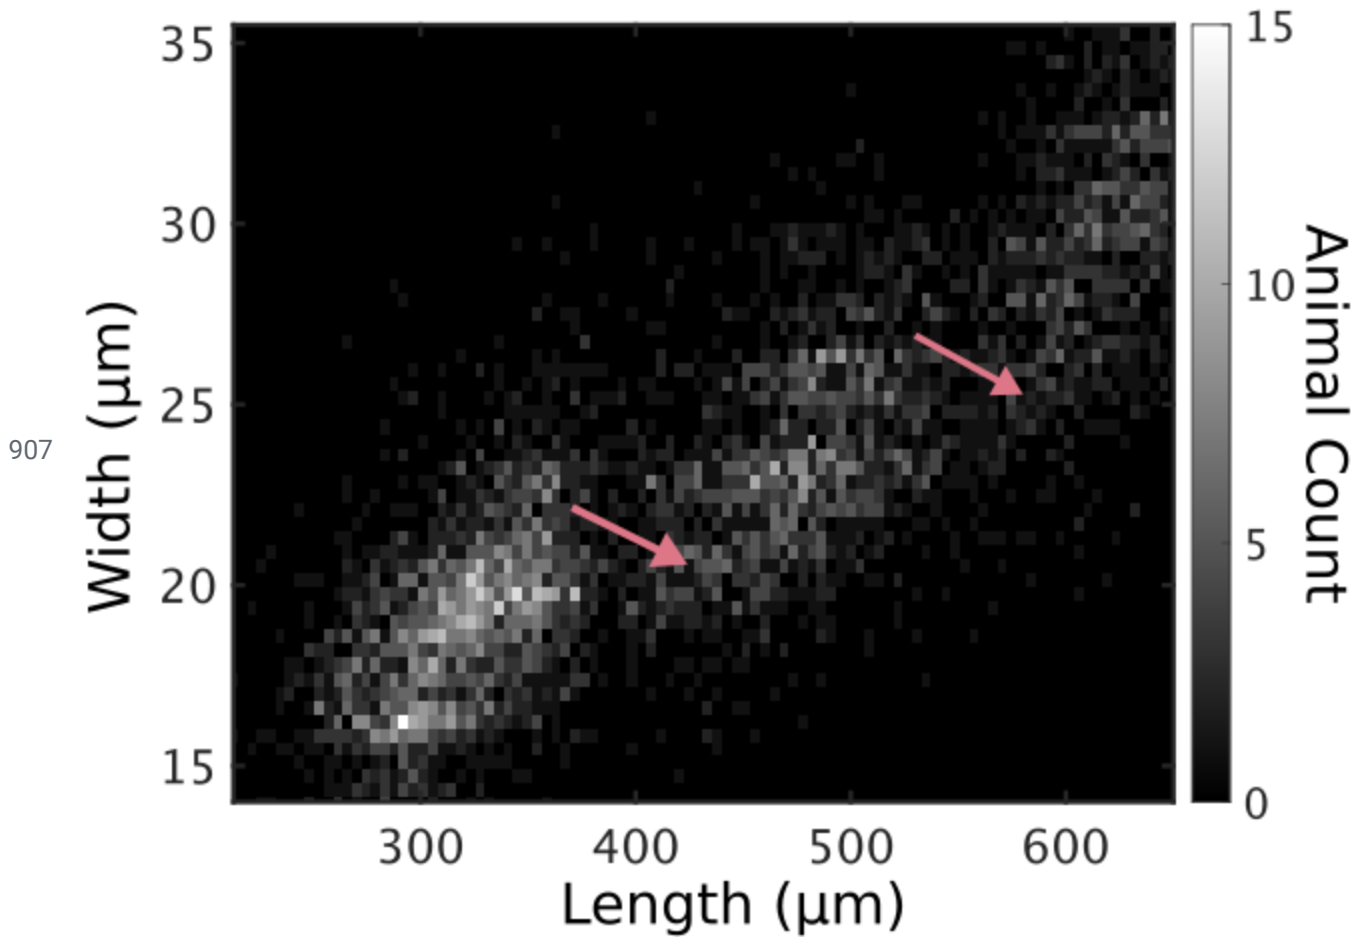

**S8 Fig.**

908 **Animals in all replicates, measured from images.** Animal length and width over *C. elegans* development  
909 captured from image data. Higher noise levels in these measurements preclude accurate regressions to  
910 individual larval stages. Length jumps and width dips are still apparent. Compare with Fig 6.

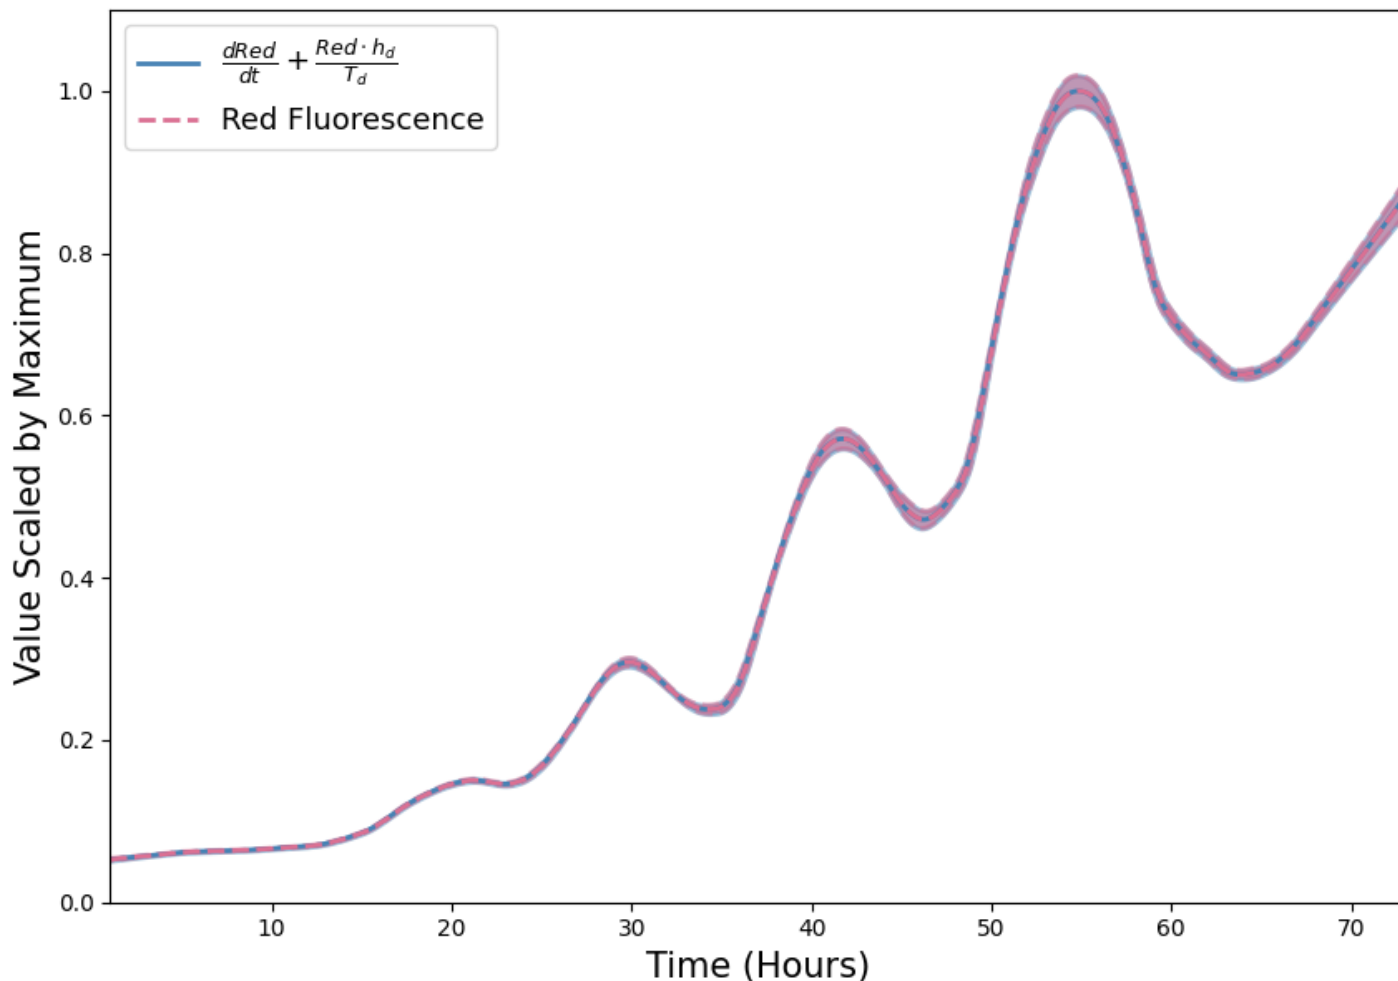

912 **S9 Fig. Comparison of red fluorescence regression and food intake rate with defecation calculation.**  
 913 Regression of red fluorescence (dashed pink) is compared to the intake rate of red beads accounting for  
 914 defecation rate (blue). Overlap of these two curves validates the use of red fluorescence as a proxy for food

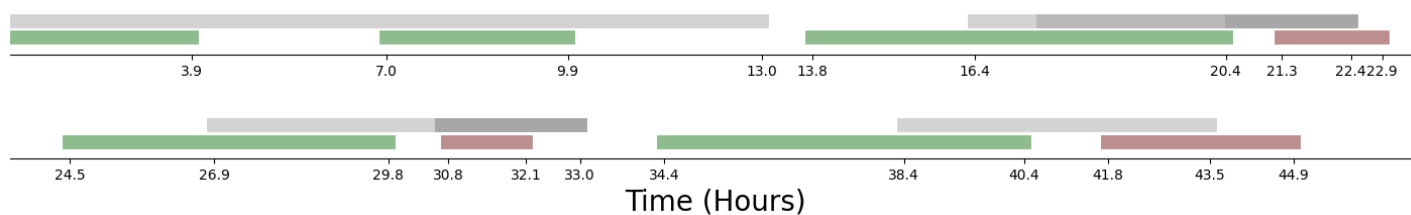

916 **S10 Fig. Timeline of Food Utilization and Stretcher events.** In the first row (grey and white), we mark the  
 917 slopes determined in the Stretcher model. Transition from lighter to darker grey indicates a step increase in  
 918 slope corresponding to a stiffening cuticle in the length direction. White regions denote time between larval  
 919 stages. L2 and L3 are the only stages at which we have useful slope information due to the change in slope  
 920 observed during L1 making transitions difficult to determine and the high level of population desynchronization  
 921 in L4. In the second row (green, red, and white), we mark the food and growth correlations found in Fig 5B.  
 922 Green corresponds to times at which both growth rate and food rate are increasing. Red corresponds to times  
 923 at which both growth rate and food rate are decreasing. White corresponds to times at which growth rate and  
 924 food rate are uncorrelated. Transitions from green to red regions occur at roughly the same times as the  
 925 transition to a stiffer cuticle in the length direction.

926

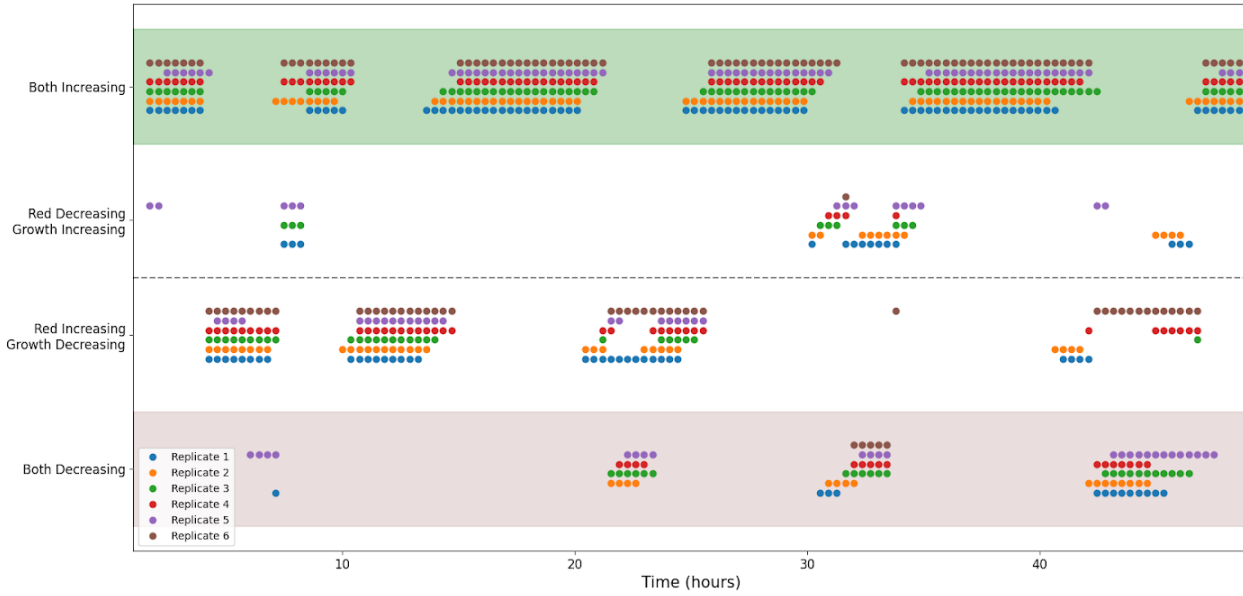

927 **S11 Fig. Analysis of Food intake and growth rate correlation for all replicates.** Summary of analysis in  
928 Fig. 8 for all replicates. Until larval stage L4, most replicates followed the same pattern of transitions from one  
929 growth regime to the next. The time delay at transitions in later replicates can be explained by the temperature  
930 gradient and differences in growth between replicates.



## Fit to Replicate 2

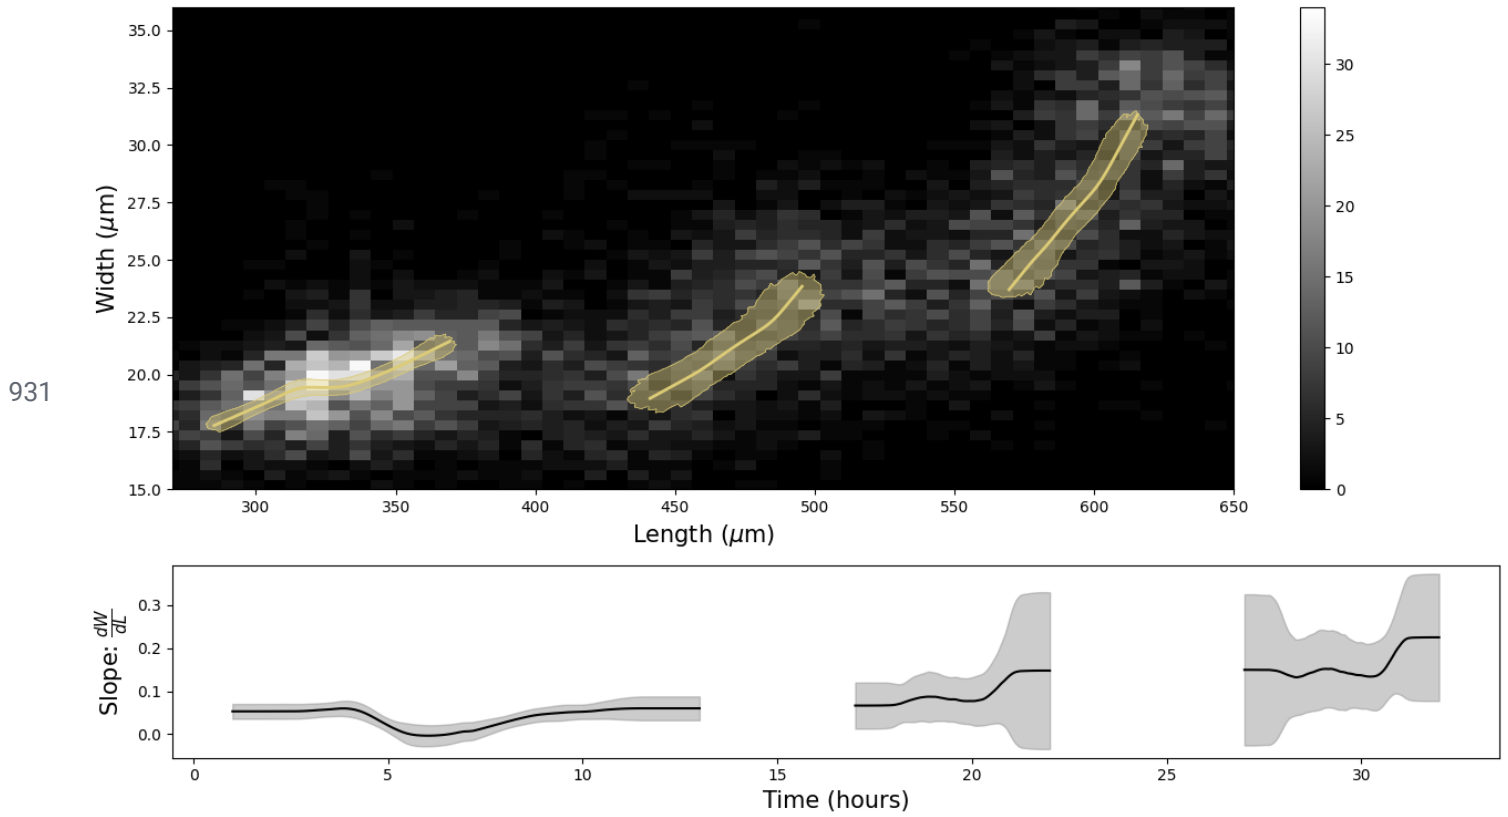

932 **S12 Fig. Stretcher model analysis of replicate 2 COPAS BIOSORT data for different stage thresholding.**  
933 Compare to Fig 5. Larval hours were defined by taking the ceiling of the lower boundary and the floor of the  
934 upper boundary. This rounding method for larval stage definition demonstrates the sensitivity of the analysis to  
935 edge effects. The unexpected step in the L2 larval stage (Fig 5) was significantly reduced with this rounding  
936 method.



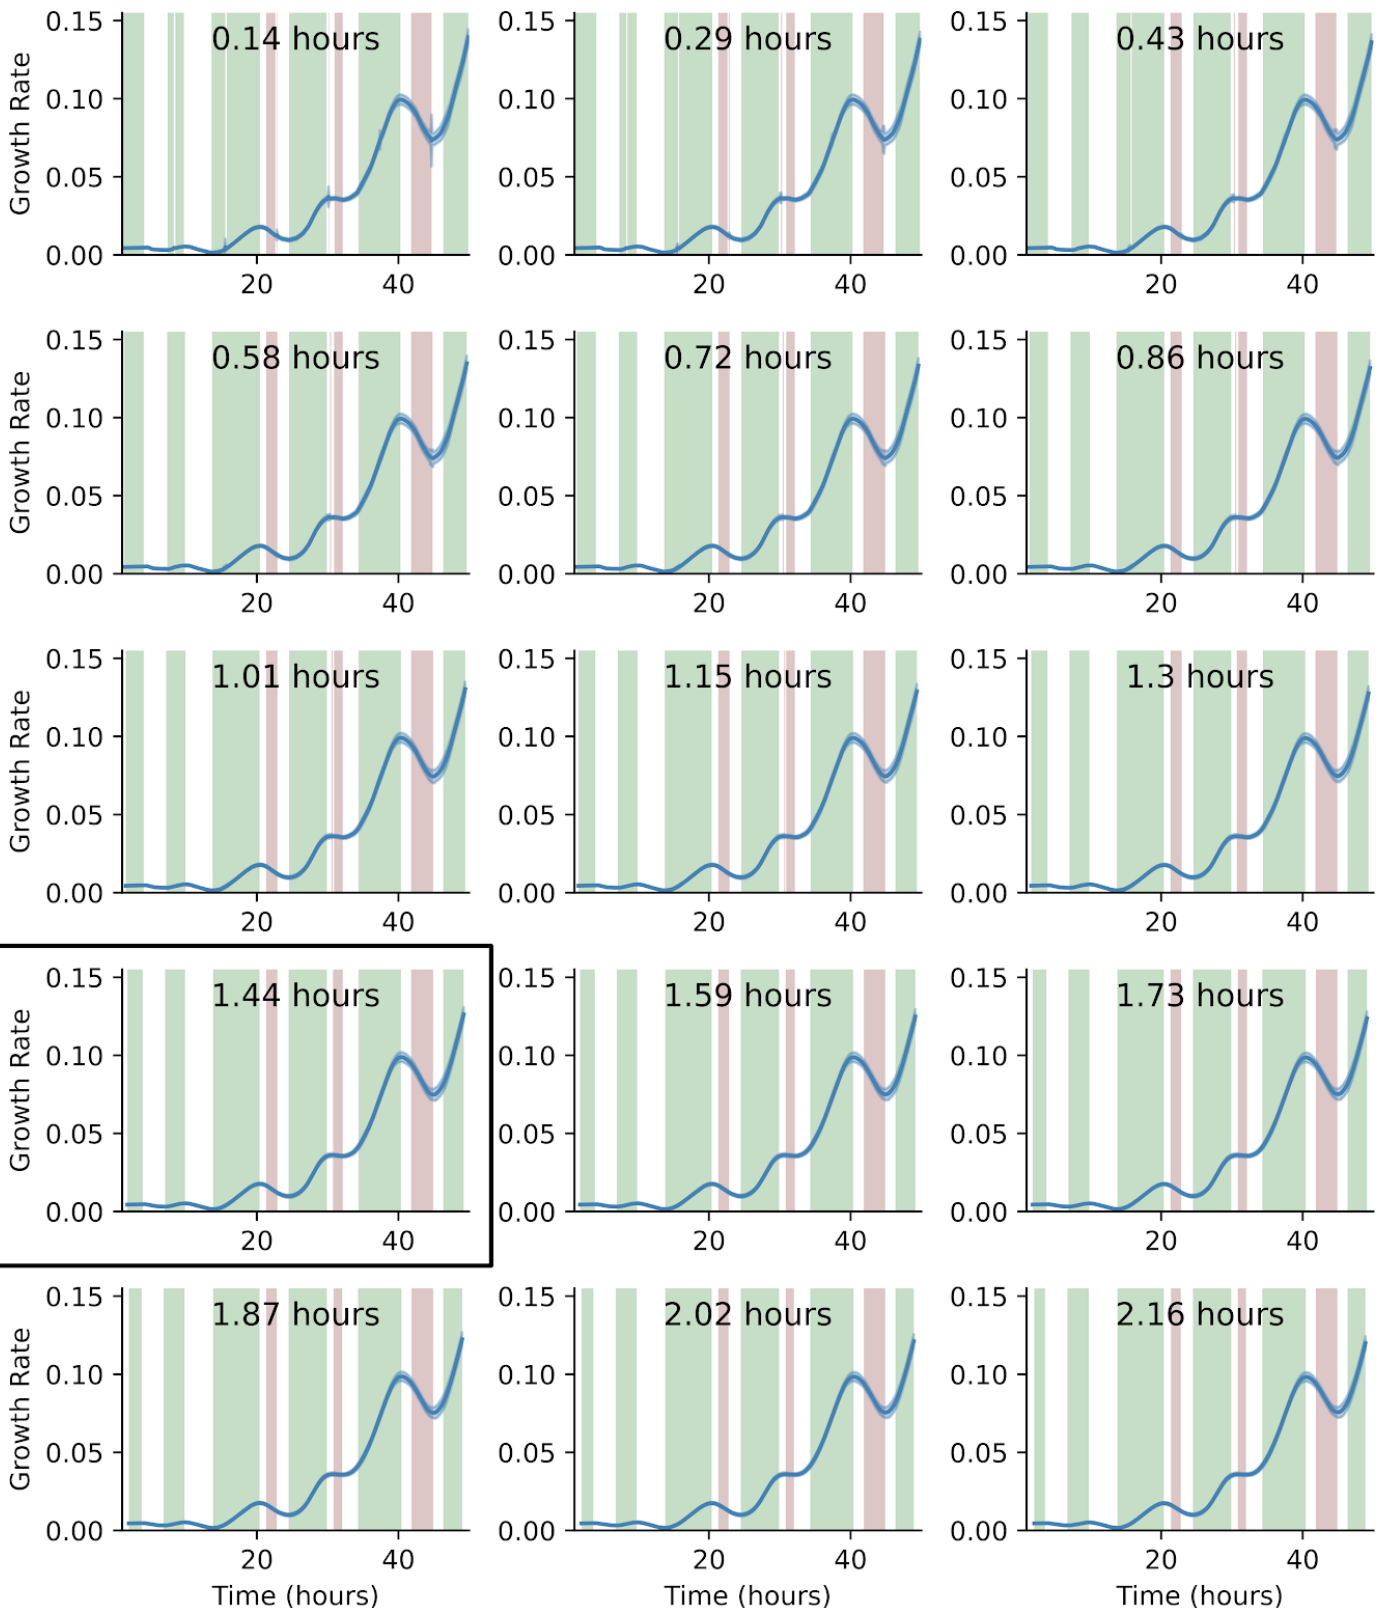

937

938 **S13 Fig. Sensitivity analysis to moving average window size.** Varying lengths of window sizes (0.14 to  
939 2.16 hours) were calculated for the *lokern* growth rate regression. Window size was increased until the growth  
940 rate regression was smoothed. A window size of 1.44 hours (or 0.72 hours on either side of each time point)  
941 was chosen to calculate the start and end times of each regime (Fig 8). Continued increase of window size  
942 past 1.44 hours did not change the pattern of regimes or their boundaries significantly.

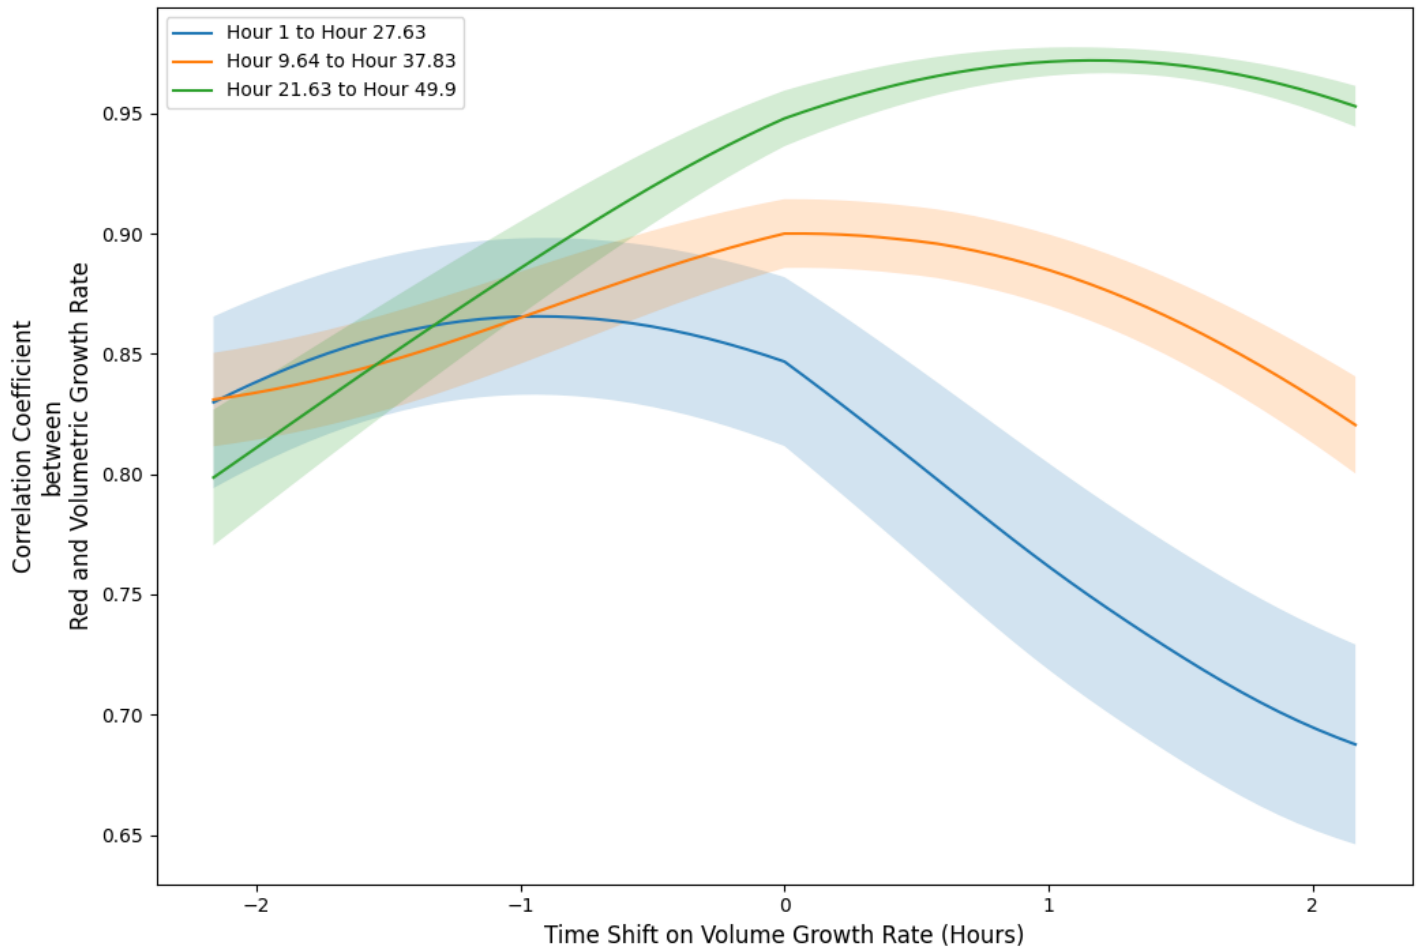

943 **S14 Fig. Time Lag Analysis.** Subsections of food intake rate and growth rate regressions were compared to  
944 determine the existing time lag between the two curves. The time shift is applied to the volume growth rate. A  
945 correlation coefficient was calculated for the new volume growth rate curve and the untouched red  
946 fluorescence regression curve for each bootstrap regression. The solid line corresponds to the mean of all the  
947 correlation coefficients over the bootstrapping iterations and the shaded regions correspond to the standard  
948 deviation. The blue curve corresponds to hours containing L1 and L2, the orange curve corresponds to hours  
949 containing L2 and L3, and the green curve corresponds to hours containing L3 and L4. The time lag at which  
950 the correlation between Red fluorescence and volume growth rate is at a maximum corresponds to the  
951 apparent time lag between the two curves. No single time lag captures the entirety of development.

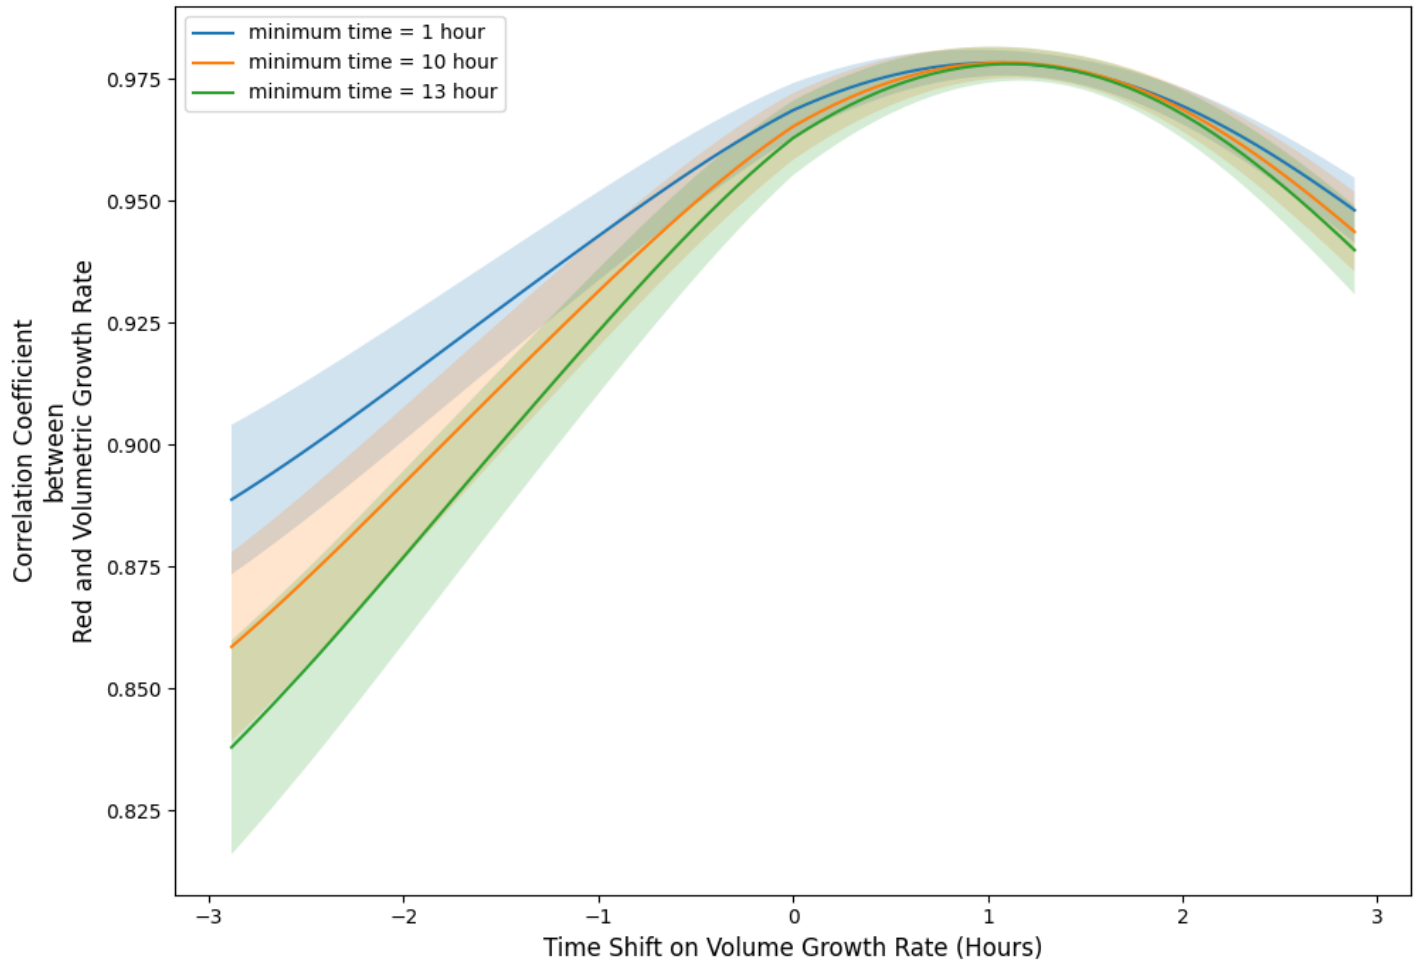

952 **S15 Fig. Time Lag Analysis.** Dynamics over all development for food intake rate and growth rate regressions  
953 were compared to determine the existing time lag between the two curves. The time shift was applied to the  
954 volume growth rate. A correlation coefficient was calculated for the new volume growth rate curve and the  
955 untouched red fluorescence regression curve for each bootstrap regression. The solid line corresponds to the  
956 mean of all the correlation coefficients over the bootstrapping iterations and the shaded regions correspond to  
957 the standard deviation. Due to the qualitatively different dynamics in L1, we calculated correlation for L1-L4  
958 (blue), the second half of L1 -L4 (orange), and L2-L4 (green). All curves show that there is an overall time shift  
959 of +1 hour (meaning changes in volume growth rate precede changes in food intake rate), matching the L3-L4  
960 curve in S14 Fig but still a <90% correlation with no time lag.

### Response = Norm.Red

| <i>Terms</i> | <i>Df</i> | <i>Sum Sq</i> | <i>Mean Sq</i> | <i>F value</i> | <i>Pr(&gt;F)</i> | <i>% Var Explained</i> |
|--------------|-----------|---------------|----------------|----------------|------------------|------------------------|
| hour         | 1         | 439.46        | 439.46         | 217762.01      | 0                | 54.34                  |
| replicate    | 6         | 165.82        | 27.64          | 13694.48       | 0                | 20.51                  |
| well         | 10        | 0.32          | 0.03           | 15.62          | 0                | 0.04                   |
| Residuals    | 100619    | 203.06        | 0              | NA             | NA               | 25.11                  |

### Response = Length

| <i>Terms</i> | <i>Df</i> | <i>Sum Sq</i> | <i>Mean Sq</i> | <i>F value</i> | <i>Pr(&gt;F)</i> | <i>% Var Explained</i> |
|--------------|-----------|---------------|----------------|----------------|------------------|------------------------|
| hour         | 1         | 86190107879   | 86190107879    | 8223506        | 0                | 98.4                   |
| replicate    | 6         | 349438944     | 58239824       | 5557           | 0                | 0.4                    |
| well         | 10        | 834970        | 83497          | 8              | 0                | 0                      |
| Residuals    | 100619    | 1054582098    | 10481          | NA             | NA               | 1.2                    |

### Response = Width

| <i>Terms</i> | <i>Df</i> | <i>Sum Sq</i> | <i>Mean Sq</i> | <i>F value</i> | <i>Pr(&gt;F)</i> | <i>% Var Explained</i> |
|--------------|-----------|---------------|----------------|----------------|------------------|------------------------|
| hour         | 1         | 209090438.47  | 209090438.47   | 6950760.3      | 0                | 97.99                  |
| replicate    | 6         | 1266985.87    | 211164.31      | 7019.7         | 0                | 0.59                   |
| well         | 10        | 1495.32       | 149.53         | 4.97           | 0                | 0                      |
| Residuals    | 100619    | 3026786.99    | 30.08          | NA             | NA               | 1.42                   |

### Response = Volume

| <i>Terms</i> | <i>Df</i> | <i>Sum Sq</i>      | <i>Mean Sq</i>     | <i>F value</i> | <i>Pr(&gt;F)</i> | <i>% Var Explained</i> |
|--------------|-----------|--------------------|--------------------|----------------|------------------|------------------------|
| hour         | 1         | 621712474191714688 | 621712474191714688 | 843342         | 0                | 84.08                  |
| replicate    | 6         | 43356968850687072  | 7226161475114512   | 9802           | 0                | 5.86                   |
| well         | 10        | 152458715405862    | 15245871540586     | 21             | 0                | 0.02                   |
| Residuals    | 100619    | 74176459811167296  | 737201321929       | NA             | NA               | 10.03                  |

961 **S1 Table. Results of analysis of variance models fit to COPAS BIOSORT data.** Analysis of variance tests  
 962 were used to quantify the amount of variance in our data contributed by the sampling technique. The sampling  
 963 technique involved unbiased sampling of animals from six replicate populations and subsequent distribution  
 964 into multiple wells of a microtiter plate for analysis. We quantified the amount of variance contributed by

965 replicate and well. We find that the variance explained by well is nearly negligible whereas replicate contributes  
 966 minor variance in some measurements. Given this information, we deem the generated summary statistics an  
 967 appropriate representation of the population.

| Stage | $\Delta AIC$ |             |       | $\Delta BIC$ |             |       | Best model by AIC | Best model by BIC |
|-------|--------------|-------------|-------|--------------|-------------|-------|-------------------|-------------------|
|       | Linear       | Exponential | Cubic | Linear       | Exponential | Cubic |                   |                   |
| L1_1  | 17           | 21          | 0     | 4            | 9           | 0     | Cubic             | Likely Cubic      |
| L1_2  | 2            | 4           | 0     | 0            | 2           | 12    | Can't distinguish | Can't distinguish |
| L2    | 142          | 43          | 0     | 128          | 28          | 0     | Cubic             | Cubic             |
| L3    | 374          | 145         | 0     | 360          | 131         | 0     | Cubic             | Cubic             |
| L4    | 4            | 44          | 0     | 0            | 40          | 10    | Likely Cubic      | Linear            |

968 **S2 Table. Model fit criteria used to assess candidate growth models.** To determine the level of support for  
 969 each model, the candidate model with the smallest raw AIC/BIC was identified and compared to other AIC/BIC  
 970 values. If the delta value was greater than 6, the model with the smallest AIC/BIC value was denoted as the  
 971 best model. If the delta value was less than 6 but greater than 2, the model with the smallest AIC/BIC value  
 972 was determined to likely be the best model. If the delta value was less than 2, we are unable to distinguish the  
 973 model of best fit.

### Green Regions

| <i>Stage</i> | <i>Food Intake Dynamical Range (AFU)</i> | <i>Food to Growth Dynamical Range - Lower Estimate (AFU)</i> | <i>Food to Growth Dynamical Range - Higher Estimate (AFU)</i> |
|--------------|------------------------------------------|--------------------------------------------------------------|---------------------------------------------------------------|
| L1 (1)       | 1                                        | 0                                                            | 0                                                             |
| L1 (2)       | 1                                        | 2                                                            | 2                                                             |
| L2           | 15                                       | 12                                                           | 15                                                            |
| L3           | 29                                       | 21                                                           | 27                                                            |
| L4           | 65                                       | 54                                                           | 69                                                            |

### Red Regions

| <i>Stage</i> | <i>Food Intake Dynamical Range (AFU)</i> | <i>Food to Growth Dynamical Range - Lower Estimate (AFU)</i> | <i>Food to Growth Dynamical Range - Higher Estimate (AFU)</i> |
|--------------|------------------------------------------|--------------------------------------------------------------|---------------------------------------------------------------|
| L1           | --                                       | --                                                           | --                                                            |
| L2           | 1                                        | 4                                                            | 5                                                             |
| L3           | 6                                        | 3                                                            | 4                                                             |
| L4           | 16                                       | 27                                                           | 35                                                            |

### White Regions Preceding Molt

| <i>Stage</i> | <i>Food Intake Dynamical Range (AFU)</i> | <i>Food to Growth Dynamical Range - Lower Estimate (AFU)</i> | <i>Food to Growth Dynamical Range - Higher Estimate (AFU)</i> |
|--------------|------------------------------------------|--------------------------------------------------------------|---------------------------------------------------------------|
| L1 -> L2     | 2                                        | 3                                                            | 4                                                             |
| L2 -> L3     | 3                                        | 1                                                            | 2                                                             |
| L3 -> L4     | 5                                        | 2                                                            | 3                                                             |
| L4 -> Adult  | 5                                        | 2                                                            | 3                                                             |

### Whole Larval Stage

| <i>Stage</i> | <i>Food Intake Dynamical Range (AFU)</i> | <i>Food to Growth Dynamical Range - Lower Estimate (AFU)</i> | <i>Food to Growth Dynamical Range - Higher Estimate (AFU)</i> |
|--------------|------------------------------------------|--------------------------------------------------------------|---------------------------------------------------------------|
| L1           | 4                                        | 2                                                            | 3                                                             |
| L2           | 19                                       | 12                                                           | 15                                                            |
| L3           | 29                                       | 21                                                           | 28                                                            |
| L4           | 70                                       | 52                                                           | 67                                                            |

974 **S3 Table.** Comparison of dynamical ranges between total food intake and food used for growth.

975 **S1 File. Incubator temperature data.** Temperature recordings of each position within the shaking incubator

976 used for the growth experiment. (CSV)

977 **S2 File. COPAS BIOSORT growth data.** Raw growth data collected from the COPAS BIOSORT and  
978 processed using the *easysorter* R package to compile information from each well. (CSV)

979 **S3 File. Pruned COPAS BIOSORT growth data.** Processed data from the COPAS BIOSORT following  
980 implementation of the *mclust* R package and removal of clusters containing non-animal objects. (CSV)

981 **S4 File. Image growth data.** Manual measurements of animal size acquired from images. (CSV)

982 **S5 File. Model derivations.**

## 1 Model Derivations

### 2 Bootstrapping Algorithm

3 To calculate a robust regression of the measured COPAS BIOSORT data we bootstrap the regression using  
4 case-resampling (Davison and Hinkley 1997, pages 261-266). Each iteration of the algorithm (**Algorithm**  
5 **S1**) involves resampling the data of interest with replacement and maintaining the size of the sample. At  
6 each iteration the lokern regression is calculated for Red, Length, and Width data. Additionally any desired  
7 function (for example, volume, pumping frequency times pharynx fraction, or derivatives) of these regressions  
8 is calculated at each iteration. Regressions at each iteration are saved and the mean and variance of these  
9 regressions at each regression time point are used to determine the statistics of the regression.

---

#### **Algorithm S1** Regression Bootstrapping with Case Resampling

---

Ndata = # animals in sample;  
iterations = # resamplings;

**for**  $i = 0$  to iterations **do**

Resample Ndata points with replacement. Collect Red, Length, Width data;

Apply lokern regression to resampled Red, Length, Width;

Calculate desired functions of Red, Length, Width regressions;

Save Red, Length, Width, and combined regressions;

**end for**

Calculate Standard deviation at each regression time point of saved regressions;

---

### 10 Derivation of eating model

11 We begin by defining the instantaneous rate of food intake as a function of the flow rate of media through  
12 the buccal cavity and the cross sectional area of the buccal cavity.

$$\frac{dV_{food}}{dt} = A_{buccal} \quad (S1)$$

13 We then make the assumption that the uptake of media fills the pharyngeal lumen we have

$$\frac{dV_{food}}{dt} = C \frac{dV_{lumen}}{dt} \quad (S2)$$

14 We average both sides of the equation under the assumption that the pumping period is significantly  
15 shorter than the time scale of growth



$$\frac{1}{T} \int_0^T \frac{dV_{food}}{dt} dt = \frac{1}{T} \int_0^T C A_{buccal} dt \quad (S3)$$

16 The integral on the right hand side is the total food intake during a single pumping period.

$$\frac{1}{T} \int_0^T \frac{dV_{food}}{dt} dt = \frac{1}{T} \Delta V_{food} \quad (S4)$$

17 We then take into account that food is not transported to the gut in the same step as its uptake. Thus  
18 the total food intake during a single pump can be calculated by the amount of food that fills the fully opened  
19 pharyngeal lumen

$$\frac{1}{T} \int_0^T \frac{dV_{food}}{dt} dt = \frac{C}{T} V_{lumen:max} \quad (S5)$$

20 We then replace the average on the right hand side with the average food intake rate over the pumping  
21 period. For simplicity and because we will deal entirely with the average food intake rate, we do not use a  
22 different notation for this average rate.

$$\frac{dV_{food}}{dt} = \frac{C}{T} V_{lumen:max} = C f(t) V_{lumen:max} \quad (S6)$$

## 23 Transformation of sorter measurements to volume units

24 To utilize sorter measurements and convert them to meaningful units we define a linear transformation from  
25 the correlation plots (S1 Fig)

$$L = a_1 TOF + b_1 \quad (S7)$$

$$W = a_2 norm.EXT + b_2. \quad (S8)$$

26 Using Equations (S7) and (S8) we can approximate the volume of any object that passes through the  
27 sorter by the expression

$$V = \frac{\pi}{4} (a_1 TOF + b_1) (a_2 norm.EXT + b_2)^2. \quad (S9)$$

## 28 Defecation analysis

29 We use the defecation results found in (Liu and Thomas 1994) to determine if red fluorescent measurements  
30 can be used as a proxy for food intake rate as opposed to the instantaneous food volume in the gut. Defecation  
31 in adults happens very regularly, with a period of  $T_d = 45 \pm 3s$ , with  $h_d = 43 \pm 10\%$  of their intestinal volume  
32 being expelled each time. The volume expelled is well mixed. Defining  $V_f$  as the current amount of food in  
33 the nematode gut. We can use conservation of mass to state that the rate of change in the amount of food  
34 in the gut is equal to the rate of food intake through eating less the defecation rate and the rate at which  
35 food volume is metabolized into cell products:

$$\frac{dV_f}{dt} = \frac{dV_f}{dt} \Big|_{\text{eating}} - \frac{dV_f}{dt} \Big|_{\text{defecating}} - \frac{dV_f}{dt} \Big|_{\text{metabolized}} \quad (\text{S10})$$

36 Using red fluorescence as a proxy for food intake we can ignore the metabolism term as the fluorescent  
37 beads are not metabolized.

$$\frac{dV_f}{dt} = \frac{dV_f}{dt} \Big|_{\text{eating}} - \frac{dV_f}{dt} \Big|_{\text{defecating}} \quad (\text{S11})$$

38 Equation (S11) states that the rate of change of the volume of fluorescent beads in the gut is equal to  
39 the difference between the intake of red fluorescent beads minus the defecation rate of red fluorescent beads.  
40 Using the results of (Liu and Thomas 1994) for the second term, and defining  $V_{f:\text{max}}$  as the volume of food  
41 in the gut just prior to defecation,  $h_d$  as the fraction of food expelled during a single defecation cycle, and  
42  $T_d$  as the period of defecation. We average Equation (S11) over short time periods to remove the pumping  
43 and defecation period oscillations.

$$\frac{dV_{\text{red:max}}}{dt} = \frac{dV_{\text{red}}}{dt} \Big|_{\text{eating}} - \frac{V_{\text{red:max}} h_d}{T_d} \quad (\text{S12})$$

44 On the left hand side, the instantaneous rate of the gut red fluorescence in Equation (S11) is replaced  
45 by the rate of change of the maximum or “full” gut fluorescence. The second term on the right hand side  
46 of Equation (S11) has been replaced by the average defecation rate over a cycle calculated by multiplying  
47 the full gut fluorescence by the fraction expelled and dividing by the defecation period. We solve Equation  
48 (S12) for the average eating rate.

$$\frac{dV_{\text{red}}}{dt} \Big|_{\text{eating}} = \frac{dV_{\text{red:max}}}{dt} + \frac{V_{\text{red:max}} h_d}{T_d} \quad (\text{S13})$$

49 We take the local regression of the red fluorescence to determine  $V_{\text{red:max}}(t)$ . This value is plugged into

50 the second term on the right hand side of Equation (S13) and its derivative is used to approximate the first  
51 term on the right hand side of Equation (S13). We take the adult values of  $h_d$  and  $T_d$  (Liu and Thomas  
52 1994) as a first approximation. Figure (S6) demonstrates a comparison of the red fluorescence and the red  
53 intake rate with defecation taken into account at the constant adult rates and quantities. We have scaled  
54 both the pink curve denoting red fluorescence and the blue curve denoting red intake rate by their maximum.  
55 This scaling allows us to see that the two curves are only a multiplicative factor apart up to error bars. This  
56 allows us to use the red measurement as a proxy for both red and food intake rates.

## 57 Food Allocation Breakdown Calculation

58 We calculate an example of resource allocation breakdown. We begin with the expression in Equation (8) of  
59 the main text relating food intake rate and animal growth rate and repeated here:

$$\frac{dV_{worm}}{dt} = \eta(t)\alpha(t)\frac{dV_{food}}{dt} \quad (S14)$$

60 Here  $\eta(t)$  is metabolic efficiency and is characteristic of the nematodes and food source used.  $\alpha(t)$  is the  
61 fraction of total ingested food allocated towards growth.

62 We make an additional assumption that food needed to maintain life is proportional to animal volume:

$$\frac{dV_{food:maint}}{dt} = \beta V_{worm}(t) \quad (S15)$$

63 Here we define  $\frac{dV_{food:maint}}{dt}$  as the rate of food intake required to maintain life and  $\beta$  is the constant of  
64 proportionality that relates animal size to required maintenance food levels. We assume that  $\beta$  is a constant  
65 over developmental time and depends on the food source available.

66 From the analysis from the previous section we can use red fluorescence as a proxy for food intake rate  
67 such that

$$\frac{dV_{food}}{dt} \propto Red \quad (S16)$$

$$\frac{dV_{worm}}{dt} \propto \eta(t)\alpha(t)Red \quad (S17)$$

$$\eta(t)\alpha(t) \propto \left(\frac{dV_{worm}}{dt}\right)/Red \quad (S18)$$

68 The constant of proportionality in Equation (S18) is unknown due to the unknown relationship between  
69 food volume and red fluorescence. We make the assumption that metabolic efficiency is constant over time

70 and any variation in the value calculated by Equation (S18) is due to changes in  $\alpha(t)$ , the allocation of food  
71 toward growth.

72 To calculate an estimate for the breakdown of food allocation, we assume a set of constants of propor-  
73 tionality for Equations (S15) and (S18). We assume that at the time at which the  $\eta(t)\alpha(t)$  curve is at its  
74 maximum (hour 40), 10% of food resources are allocated towards maintenance, 70% (low growth estimate) or  
75 90% (high growth estimate) are allocated towards growth, and the remainder is allocated to other metabolic  
76 processes. The resulting scaling factors are applied over developmental time to calculate an estimated food  
77 allocation breakdown and presented in Figure (8) of the main text.

## 78 Derivation of Stretcher Model

79 We model the cuticle as a thin walled pressure vessel made of orthotropic, linear materials to capture the  
80 relationship between how much the cuticle stretches and the force applied to the cuticle. The relationship  
81 between the amount of stretch and the amount of applied pressure is described by the matrix:

$$\begin{bmatrix} \varepsilon_L \\ \varepsilon_{Circ} \end{bmatrix} = \begin{bmatrix} \frac{1}{E_L} & \frac{-v_{cl}}{E_c} \\ \frac{-v_{lc}}{E_L} & \frac{1}{E_c} \end{bmatrix} \begin{bmatrix} \sigma_L \\ \sigma_{Circ} \end{bmatrix} \quad (\text{S19})$$

82 Here  $E_L$  and  $E_C$  are the Young's modulus in the length and circumferential direction, and  $v_{cl}$  and  $v_{lc}$   
83 are the appropriate Poisson's ratios. These material properties can be measured experimentally. Normalized  
84 stretch,  $\varepsilon$ , is defined as the change in size normalized by the initial size of a cuticle in length (L) and  
85 circumference (Circ) (**Equations S20 - S21**). Here  $\sigma$  is the normalized force applied along the length and  
86 circumferential directions of the cuticle (**Equations S23 - S24**).

$$\varepsilon_L = \frac{\Delta L}{L_0} \quad (\text{S20})$$

$$\varepsilon_{Circ} = \frac{\Delta Circ}{Circ_0} \quad (\text{S21})$$

87 Here  $L_0$  and  $Circ_0$  are the length and circumference of the cuticle at the onset of stretch, or in other words  
88 at the start of a larval stage. Experimentally we measure width, not circumference, but the circumference  
89 of a circle is proportional to the width of the circle, so we can replace the circumference with the measured  
90 width:

$$\frac{\Delta Circ}{Circ_0} = \frac{\pi \Delta W}{\pi W_0} = \frac{\Delta W}{W_0} \quad (\text{S22})$$

91 By approximating *C. elegans* as cylindrical, and assuming the only force working on the cuticle is isotropic  
92 internal pressure, we can determine the normalized force in terms of pressure and geometric properties:

$$\sigma_L = \frac{r}{2t} \Delta p \quad (\text{S23})$$

$$\sigma_{Circ} = \frac{r}{t} \Delta p \quad (\text{S24})$$

93 Where  $r$  is the radius of the cylinder and  $t$  is the thickness of the cuticle. We can now rewrite Equation  
94 (S19) in terms of measurable quantities (length and width) by multiplying out the matrices making the  
95 appropriate substitutions.

$$\Delta L = \frac{L_0 r}{t} \left( \frac{1}{2E_L} - \frac{v_{cl}}{E_c} \right) \Delta p = a_L \Delta p \quad (\text{S25})$$

$$\Delta W = \frac{W_0 r}{t} \left( \frac{1}{E_C} - \frac{v_{lc}}{E_L} \right) \Delta p = a_W \Delta p \quad (\text{S26})$$

Here we compress the coefficients fixed by material and geometric properties into one constant

$$a_L = \frac{L_0 r}{t} \left( \frac{1}{2E_L} - \frac{v_{cl}}{E_c} \right) \quad (\text{S27})$$

$$a_W = \frac{W_0 r}{t} \left( \frac{1}{E_C} - \frac{v_{lc}}{E_L} \right) \quad (\text{S28})$$

## 96 Stretcher Slope Calculations

97 The Stretcher model predicts a constant ratio between stretch in width,  $\Delta W$ , and stretch in length,  $\Delta L$ .  
98 These measures of stretch are changes in the length and width measurements over some period of time. To  
99 see how the ratio of  $\frac{\Delta W}{\Delta L}$  changes throughout a larval stage, we need to measure the stretch instantaneously.  
100 To do this we take advantage of the derivative approximation

$$\Delta W \approx \frac{dW}{dt} \Delta t \quad (\text{S29})$$

$$\Delta L \approx \frac{dL}{dt} \Delta t \quad (\text{S30})$$

101 Equations (S29, S30) are combined in the ratio found in Equation (3) to give:

$$\frac{\Delta W}{\Delta L} \approx \frac{W'(t)}{L'(t)} \quad (\text{S31})$$

102 Here  $W' = \frac{dW}{dt}$  and  $L' = \frac{dL}{dt}$ . We differentiate the time series from the local regressions of length and  
103 width data. The ratio of derivatives gives the instantaneous stretch ratio as it changes over time. Due to  
104 the numerical difficulty of calculating both derivatives and ratios with accuracy, we expect large error bars  
105 for this ratio. To estimate the size of error bars we apply a first order error propagation formula to Equation  
106 (S31).

$$\sigma_{Ratio}^2 \approx \left| \frac{\partial Ratio}{\partial(W')} \right|^2 \sigma_{(W')}^2 + \left| \frac{\partial Ratio}{\partial(L')} \right|^2 \sigma_{(L')}^2 + 2 \frac{\partial Ratio}{\partial(W')} \frac{\partial Ratio}{\partial(L')} \sigma_{(W')(L')} \quad (\text{S32})$$

$$\sigma_{Ratio}^2 \approx \left| \frac{1}{L'} \right|^2 \sigma_{(W')}^2 + \left| \frac{-(W')^2}{(L')^3} \right|^2 \sigma_{(L')}^2 - 2 \frac{W'}{(L')^3} \sigma_{(W')(L')} \quad (\text{S33})$$

107 The variance in Equation (S33) is calculated for each time point in the regressions of length and width.  
108 We resample the data for each larval stage 2,000 times with replacement (see Methods for larval stage  
109 determination). For each of these resampled sets of data, we numerically differentiate the length and width  
110 regression to determine an estimate of the length and width derivatives over time. At each time point the  
111 mean regression length and width derivatives are used in place of  $W'$  and  $L'$ . The covariance matrix for the  
112 length and width derivatives is calculated at each time point using the 2,000 resampled regressions in the  
113 bootstrap analysis and used as the variance terms in Equation (S33).
